# Supplementary material
Source: ML conference proceedings conference paper supplement (https://openaccess.thecvf.com/content/CVPR_2019/html/Hu_Listen_to_the_CVPR_2019_paper.html)
Supplement: Supplementary file 2 [file Hu_Listen_to_the_CVPR_2019_supplemental.pdf]

Archive with 159 entries (139 files):
- 3386-supp/
- 3386-supp/examples/
- 3386-supp/examples/the modified scheme w.r.t. audio length/
- 3386-supp/examples/the modified scheme w.r.t. audio length/fifth lesson/
- 3386-supp/examples/the modified scheme w.r.t. audio length/fifth lesson/bottom-left.jpg
- 3386-supp/examples/the modified scheme w.r.t. audio length/fifth lesson/bottom-left.wav
- 3386-supp/examples/the modified scheme w.r.t. audio length/fifth lesson/bottom-right.jpg
- 3386-supp/examples/the modified scheme w.r.t. audio length/fifth lesson/bottom-right.wav
- 3386-supp/examples/the modified scheme w.r.t. audio length/fifth lesson/center.jpg
- 3386-supp/examples/the modified scheme w.r.t. audio length/fifth lesson/center.wav
- 3386-supp/examples/the modified scheme w.r.t. audio length/fifth lesson/upper-left.jpg
- 3386-supp/examples/the modified scheme w.r.t. audio length/fifth lesson/upper-left.wav
- 3386-supp/examples/the modified scheme w.r.t. audio length/fifth lesson/upper-right.jpg
- 3386-supp/examples/the modified scheme w.r.t. audio length/fifth lesson/upper-right.wav
- 3386-supp/examples/the modified scheme w.r.t. audio length/first lesson/
- 3386-supp/examples/the modified scheme w.r.t. audio length/first lesson/circle.jpg
- 3386-supp/examples/the modified scheme w.r.t. audio length/first lesson/circle.wav
- 3386-supp/examples/the modified scheme w.r.t. audio length/first lesson/square.jpg
- 3386-supp/examples/the modified scheme w.r.t. audio length/first lesson/square.wav
- 3386-supp/examples/the modified scheme w.r.t. audio length/first lesson/triangle.jpg
- 3386-supp/examples/the modified scheme w.r.t. audio length/first lesson/triangle.wav
- 3386-supp/examples/the modified scheme w.r.t. audio length/fourth lesson/
- 3386-supp/examples/the modified scheme w.r.t. audio length/fourth lesson/120.jpg
- 3386-supp/examples/the modified scheme w.r.t. audio length/fourth lesson/120.wav
- 3386-supp/examples/the modified scheme w.r.t. audio length/fourth lesson/150.jpg
- 3386-supp/examples/the modified scheme w.r.t. audio length/fourth lesson/150.wav
- 3386-supp/examples/the modified scheme w.r.t. audio length/fourth lesson/180.jpg
- 3386-supp/examples/the modified scheme w.r.t. audio length/fourth lesson/180.wav
- 3386-supp/examples/the modified scheme w.r.t. audio length/fourth lesson/210.jpg
- 3386-supp/examples/the modified scheme w.r.t. audio length/fourth lesson/210.wav
- 3386-supp/examples/the modified scheme w.r.t. audio length/fourth lesson/90.jpg
- 3386-supp/examples/the modified scheme w.r.t. audio length/fourth lesson/90.wav
- 3386-supp/examples/the modified scheme w.r.t. audio length/second lesson/
- 3386-supp/examples/the modified scheme w.r.t. audio length/second lesson/1.jpg
- 3386-supp/examples/the modified scheme w.r.t. audio length/second lesson/1.wav
- 3386-supp/examples/the modified scheme w.r.t. audio length/second lesson/2.jpg
- 3386-supp/examples/the modified scheme w.r.t. audio length/second lesson/2.wav
- 3386-supp/examples/the modified scheme w.r.t. audio length/second lesson/3.jpg
- 3386-supp/examples/the modified scheme w.r.t. audio length/second lesson/3.wav
- 3386-supp/examples/the modified scheme w.r.t. audio length/second lesson/4.jpg
- 3386-supp/examples/the modified scheme w.r.t. audio length/second lesson/4.wav
- 3386-supp/examples/the modified scheme w.r.t. audio length/third lesson/
- 3386-supp/examples/the modified scheme w.r.t. audio length/third lesson/-22.jpg
- 3386-supp/examples/the modified scheme w.r.t. audio length/third lesson/-22.wav
- 3386-supp/examples/the modified scheme w.r.t. audio length/third lesson/-45.jpg
- 3386-supp/examples/the modified scheme w.r.t. audio length/third lesson/-45.wav
- 3386-supp/examples/the modified scheme w.r.t. audio length/third lesson/0.jpg
- 3386-supp/examples/the modified scheme w.r.t. audio length/third lesson/0.wav
- 3386-supp/examples/the modified scheme w.r.t. audio length/third lesson/22.jpg
- 3386-supp/examples/the modified scheme w.r.t. audio length/third lesson/22.wav
- 3386-supp/examples/the modified scheme w.r.t. audio length/third lesson/45.jpg
- 3386-supp/examples/the modified scheme w.r.t. audio length/third lesson/45.wav
- 3386-supp/examples/the modified scheme w.r.t. audio length/third lesson/90.jpg
- 3386-supp/examples/the modified scheme w.r.t. audio length/third lesson/90.wav
- 3386-supp/examples/the modified scheme w.r.t. PF function/
- 3386-supp/examples/the modified scheme w.r.t. PF function/fifth lesson/
- 3386-supp/examples/the modified scheme w.r.t. PF function/fifth lesson/bottom-left.jpg
- 3386-supp/examples/the modified scheme w.r.t. PF function/fifth lesson/bottom-left.wav
- 3386-supp/examples/the modified scheme w.r.t. PF function/fifth lesson/bottom-right.jpg
- 3386-supp/examples/the modified scheme w.r.t. PF function/fifth lesson/bottom-right.wav
- 3386-supp/examples/the modified scheme w.r.t. PF function/fifth lesson/center.jpg
- 3386-supp/examples/the modified scheme w.r.t. PF function/fifth lesson/center.wav
- 3386-supp/examples/the modified scheme w.r.t. PF function/fifth lesson/upper-left.jpg
- 3386-supp/examples/the modified scheme w.r.t. PF function/fifth lesson/upper-left.wav
- 3386-supp/examples/the modified scheme w.r.t. PF function/fifth lesson/upper-right.jpg
- 3386-supp/examples/the modified scheme w.r.t. PF function/fifth lesson/upper-right.wav
- 3386-supp/examples/the modified scheme w.r.t. PF function/first lesson/
- 3386-supp/examples/the modified scheme w.r.t. PF function/first lesson/circle.jpg
- 3386-supp/examples/the modified scheme w.r.t. PF function/first lesson/circle.wav
- 3386-supp/examples/the modified scheme w.r.t. PF function/first lesson/square.jpg
- 3386-supp/examples/the modified scheme w.r.t. PF function/first lesson/square.wav
- 3386-supp/examples/the modified scheme w.r.t. PF function/first lesson/triangle.jpg
- 3386-supp/examples/the modified scheme w.r.t. PF function/first lesson/triangle.wav
- 3386-supp/examples/the modified scheme w.r.t. PF function/fourth lesson/
- 3386-supp/examples/the modified scheme w.r.t. PF function/fourth lesson/120.jpg
- 3386-supp/examples/the modified scheme w.r.t. PF function/fourth lesson/120.wav
- 3386-supp/examples/the modified scheme w.r.t. PF function/fourth lesson/150.jpg
- 3386-supp/examples/the modified scheme w.r.t. PF function/fourth lesson/150.wav
- 3386-supp/examples/the modified scheme w.r.t. PF function/fourth lesson/180.jpg
- 3386-supp/examples/the modified scheme w.r.t. PF function/fourth lesson/180.wav
- 3386-supp/examples/the modified scheme w.r.t. PF function/fourth lesson/210.jpg
- 3386-supp/examples/the modified scheme w.r.t. PF function/fourth lesson/210.wav
- 3386-supp/examples/the modified scheme w.r.t. PF function/fourth lesson/90.jpg
- 3386-supp/examples/the modified scheme w.r.t. PF function/fourth lesson/90.wav
- 3386-supp/examples/the modified scheme w.r.t. PF function/second lesson/
- 3386-supp/examples/the modified scheme w.r.t. PF function/second lesson/1.jpg
- 3386-supp/examples/the modified scheme w.r.t. PF function/second lesson/1.wav
- 3386-supp/examples/the modified scheme w.r.t. PF function/second lesson/2.jpg
- 3386-supp/examples/the modified scheme w.r.t. PF function/second lesson/2.wav
- 3386-supp/examples/the modified scheme w.r.t. PF function/second lesson/3.jpg
- 3386-supp/examples/the modified scheme w.r.t. PF function/second lesson/3.wav
- 3386-supp/examples/the modified scheme w.r.t. PF function/second lesson/4.jpg
- 3386-supp/examples/the modified scheme w.r.t. PF function/second lesson/4.wav
- 3386-supp/examples/the modified scheme w.r.t. PF function/third lesson/
- 3386-supp/examples/the modified scheme w.r.t. PF function/third lesson/-22.jpg
- 3386-supp/examples/the modified scheme w.r.t. PF function/third lesson/-22.wav
- 3386-supp/examples/the modified scheme w.r.t. PF function/third lesson/-45.jpg
- 3386-supp/examples/the modified scheme w.r.t. PF function/third lesson/-45.wav
- 3386-supp/examples/the modified scheme w.r.t. PF function/third lesson/0.jpg
- 3386-supp/examples/the modified scheme w.r.t. PF function/third lesson/0.wav
- 3386-supp/examples/the modified scheme w.r.t. PF function/third lesson/22.jpg
- 3386-supp/examples/the modified scheme w.r.t. PF function/third lesson/22.wav
- 3386-supp/examples/the modified scheme w.r.t. PF function/third lesson/45.jpg
- 3386-supp/examples/the modified scheme w.r.t. PF function/third lesson/45.wav
- 3386-supp/examples/the modified scheme w.r.t. PF function/third lesson/90.jpg
- 3386-supp/examples/the modified scheme w.r.t. PF function/third lesson/90.wav
- 3386-supp/examples/the primary encoding scheme/
- 3386-supp/examples/the primary encoding scheme/fifth lesson/
- 3386-supp/examples/the primary encoding scheme/fifth lesson/bottom-left.jpg
- 3386-supp/examples/the primary encoding scheme/fifth lesson/bottom-left.wav
- 3386-supp/examples/the primary encoding scheme/fifth lesson/bottom-right.jpg
- 3386-supp/examples/the primary encoding scheme/fifth lesson/bottom-right.wav
- 3386-supp/examples/the primary encoding scheme/fifth lesson/center.jpg
- 3386-supp/examples/the primary encoding scheme/fifth lesson/center.wav
- 3386-supp/examples/the primary encoding scheme/fifth lesson/upper-left.jpg
- 3386-supp/examples/the primary encoding scheme/fifth lesson/upper-left.wav
- 3386-supp/examples/the primary encoding scheme/fifth lesson/upper-right.jpg
- 3386-supp/examples/the primary encoding scheme/fifth lesson/upper-right.wav
- 3386-supp/examples/the primary encoding scheme/first lesson/
- 3386-supp/examples/the primary encoding scheme/first lesson/circle.jpg
- 3386-supp/examples/the primary encoding scheme/first lesson/circle.wav
- 3386-supp/examples/the primary encoding scheme/first lesson/square.jpg
- 3386-supp/examples/the primary encoding scheme/first lesson/square.wav
- 3386-supp/examples/the primary encoding scheme/first lesson/triangle.jpg
- 3386-supp/examples/the primary encoding scheme/first lesson/triangle.wav
- 3386-supp/examples/the primary encoding scheme/fourth lesson/
- 3386-supp/examples/the primary encoding scheme/fourth lesson/120.jpg
- 3386-supp/examples/the primary encoding scheme/fourth lesson/120.wav
- 3386-supp/examples/the primary encoding scheme/fourth lesson/150.jpg
- 3386-supp/examples/the primary encoding scheme/fourth lesson/150.wav
- 3386-supp/examples/the primary encoding scheme/fourth lesson/180.jpg
- 3386-supp/examples/the primary encoding scheme/fourth lesson/180.wav
- 3386-supp/examples/the primary encoding scheme/fourth lesson/210.jpg
- 3386-supp/examples/the primary encoding scheme/fourth lesson/210.wav
- 3386-supp/examples/the primary encoding scheme/fourth lesson/90.jpg
- 3386-supp/examples/the primary encoding scheme/fourth lesson/90.wav
- 3386-supp/examples/the primary encoding scheme/second lesson/
- 3386-supp/examples/the primary encoding scheme/second lesson/1.jpg
- 3386-supp/examples/the primary encoding scheme/second lesson/1.wav
- 3386-supp/examples/the primary encoding scheme/second lesson/2.jpg
- 3386-supp/examples/the primary encoding scheme/second lesson/2.wav
- 3386-supp/examples/the primary encoding scheme/second lesson/3.jpg
- 3386-supp/examples/the primary encoding scheme/second lesson/3.wav
- 3386-supp/examples/the primary encoding scheme/second lesson/4.jpg
- 3386-supp/examples/the primary encoding scheme/second lesson/4.wav
- 3386-supp/examples/the primary encoding scheme/third lesson/
- 3386-supp/examples/the primary encoding scheme/third lesson/-22.jpg
- 3386-supp/examples/the primary encoding scheme/third lesson/-22.wav
- 3386-supp/examples/the primary encoding scheme/third lesson/-45.jpg
- 3386-supp/examples/the primary encoding scheme/third lesson/-45.wav
- 3386-supp/examples/the primary encoding scheme/third lesson/0.jpg
- 3386-supp/examples/the primary encoding scheme/third lesson/0.wav
- 3386-supp/examples/the primary encoding scheme/third lesson/22.jpg
- 3386-supp/examples/the primary encoding scheme/third lesson/22.wav
- 3386-supp/examples/the primary encoding scheme/third lesson/45.jpg
- 3386-supp/examples/the primary encoding scheme/third lesson/45.wav
- 3386-supp/examples/the primary encoding scheme/third lesson/90.jpg
- 3386-supp/examples/the primary encoding scheme/third lesson/90.wav
- 3386-supp/material.pdf
