# Supplementary material
Source: ML conference proceedings conference paper supplement (https://openaccess.thecvf.com/content/CVPR_2019/html/Hu_Listen_to_the_CVPR_2019_paper.html)

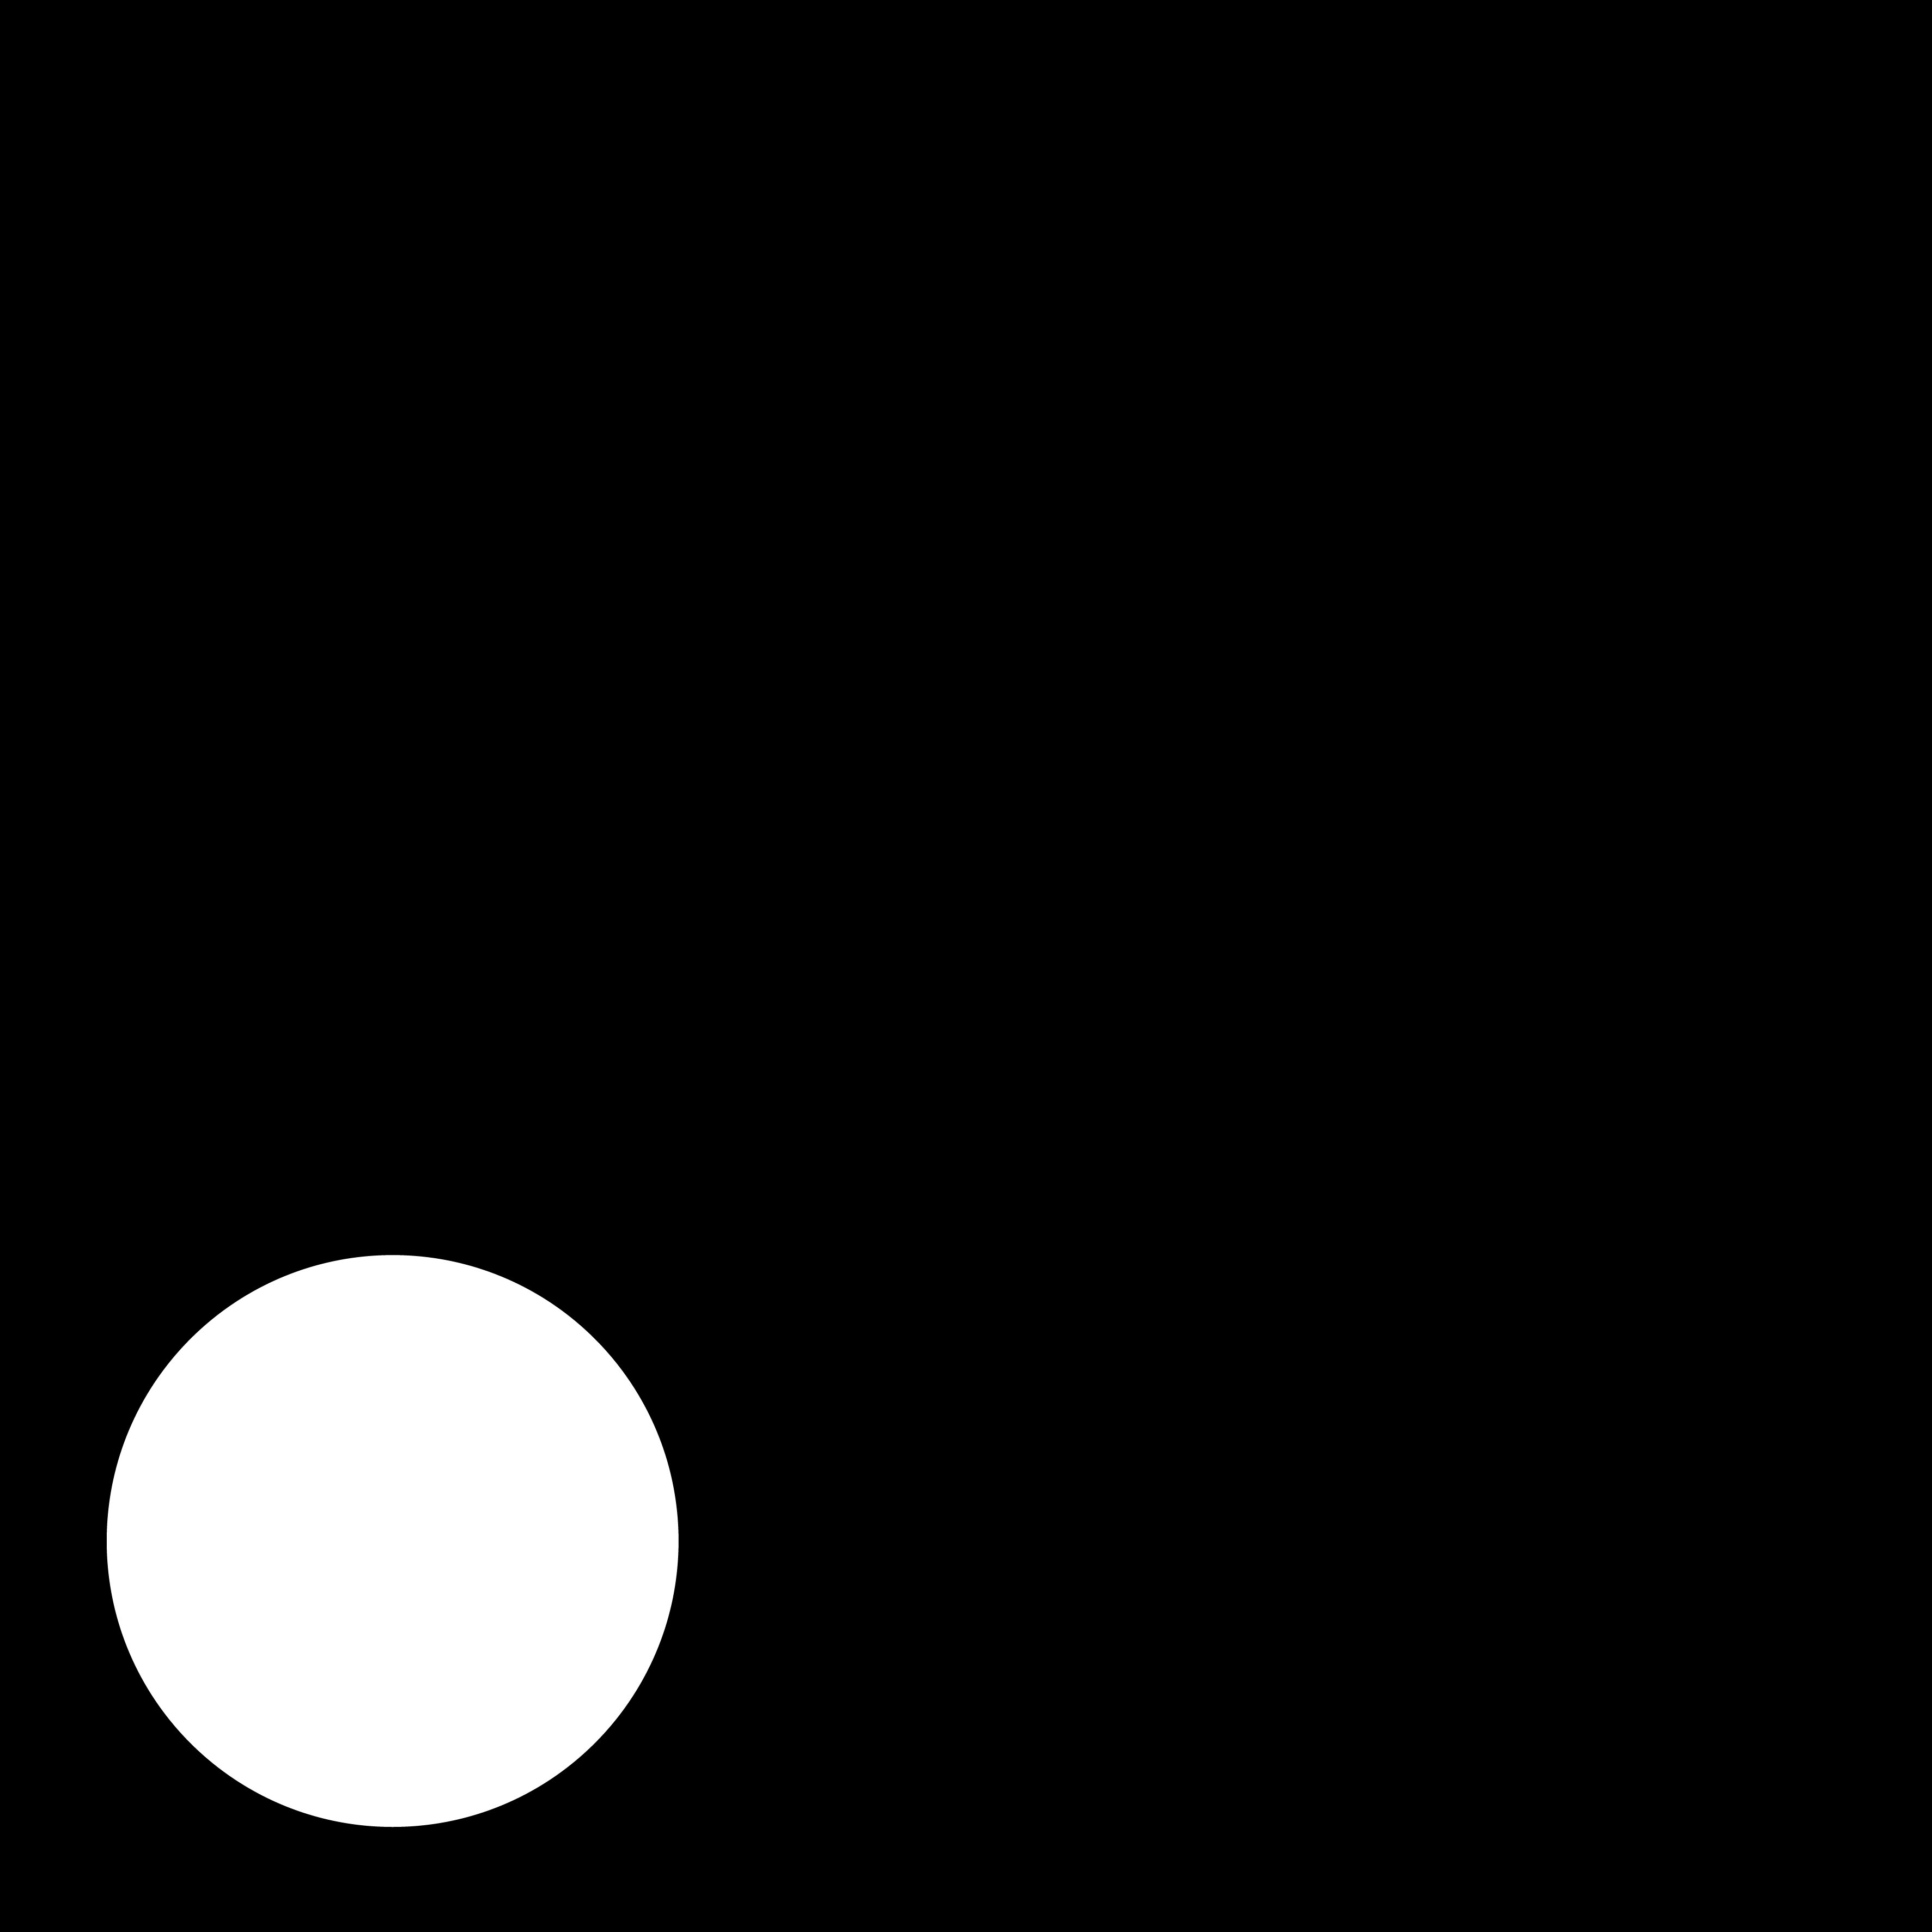

Supplement: Supplementary file 2 [file Hu_Listen_to_the_CVPR_2019_supplemental.pdf › 3386-supp/examples/the modified scheme w.r.t. audio length/fifth lesson/bottom-left.jpg]

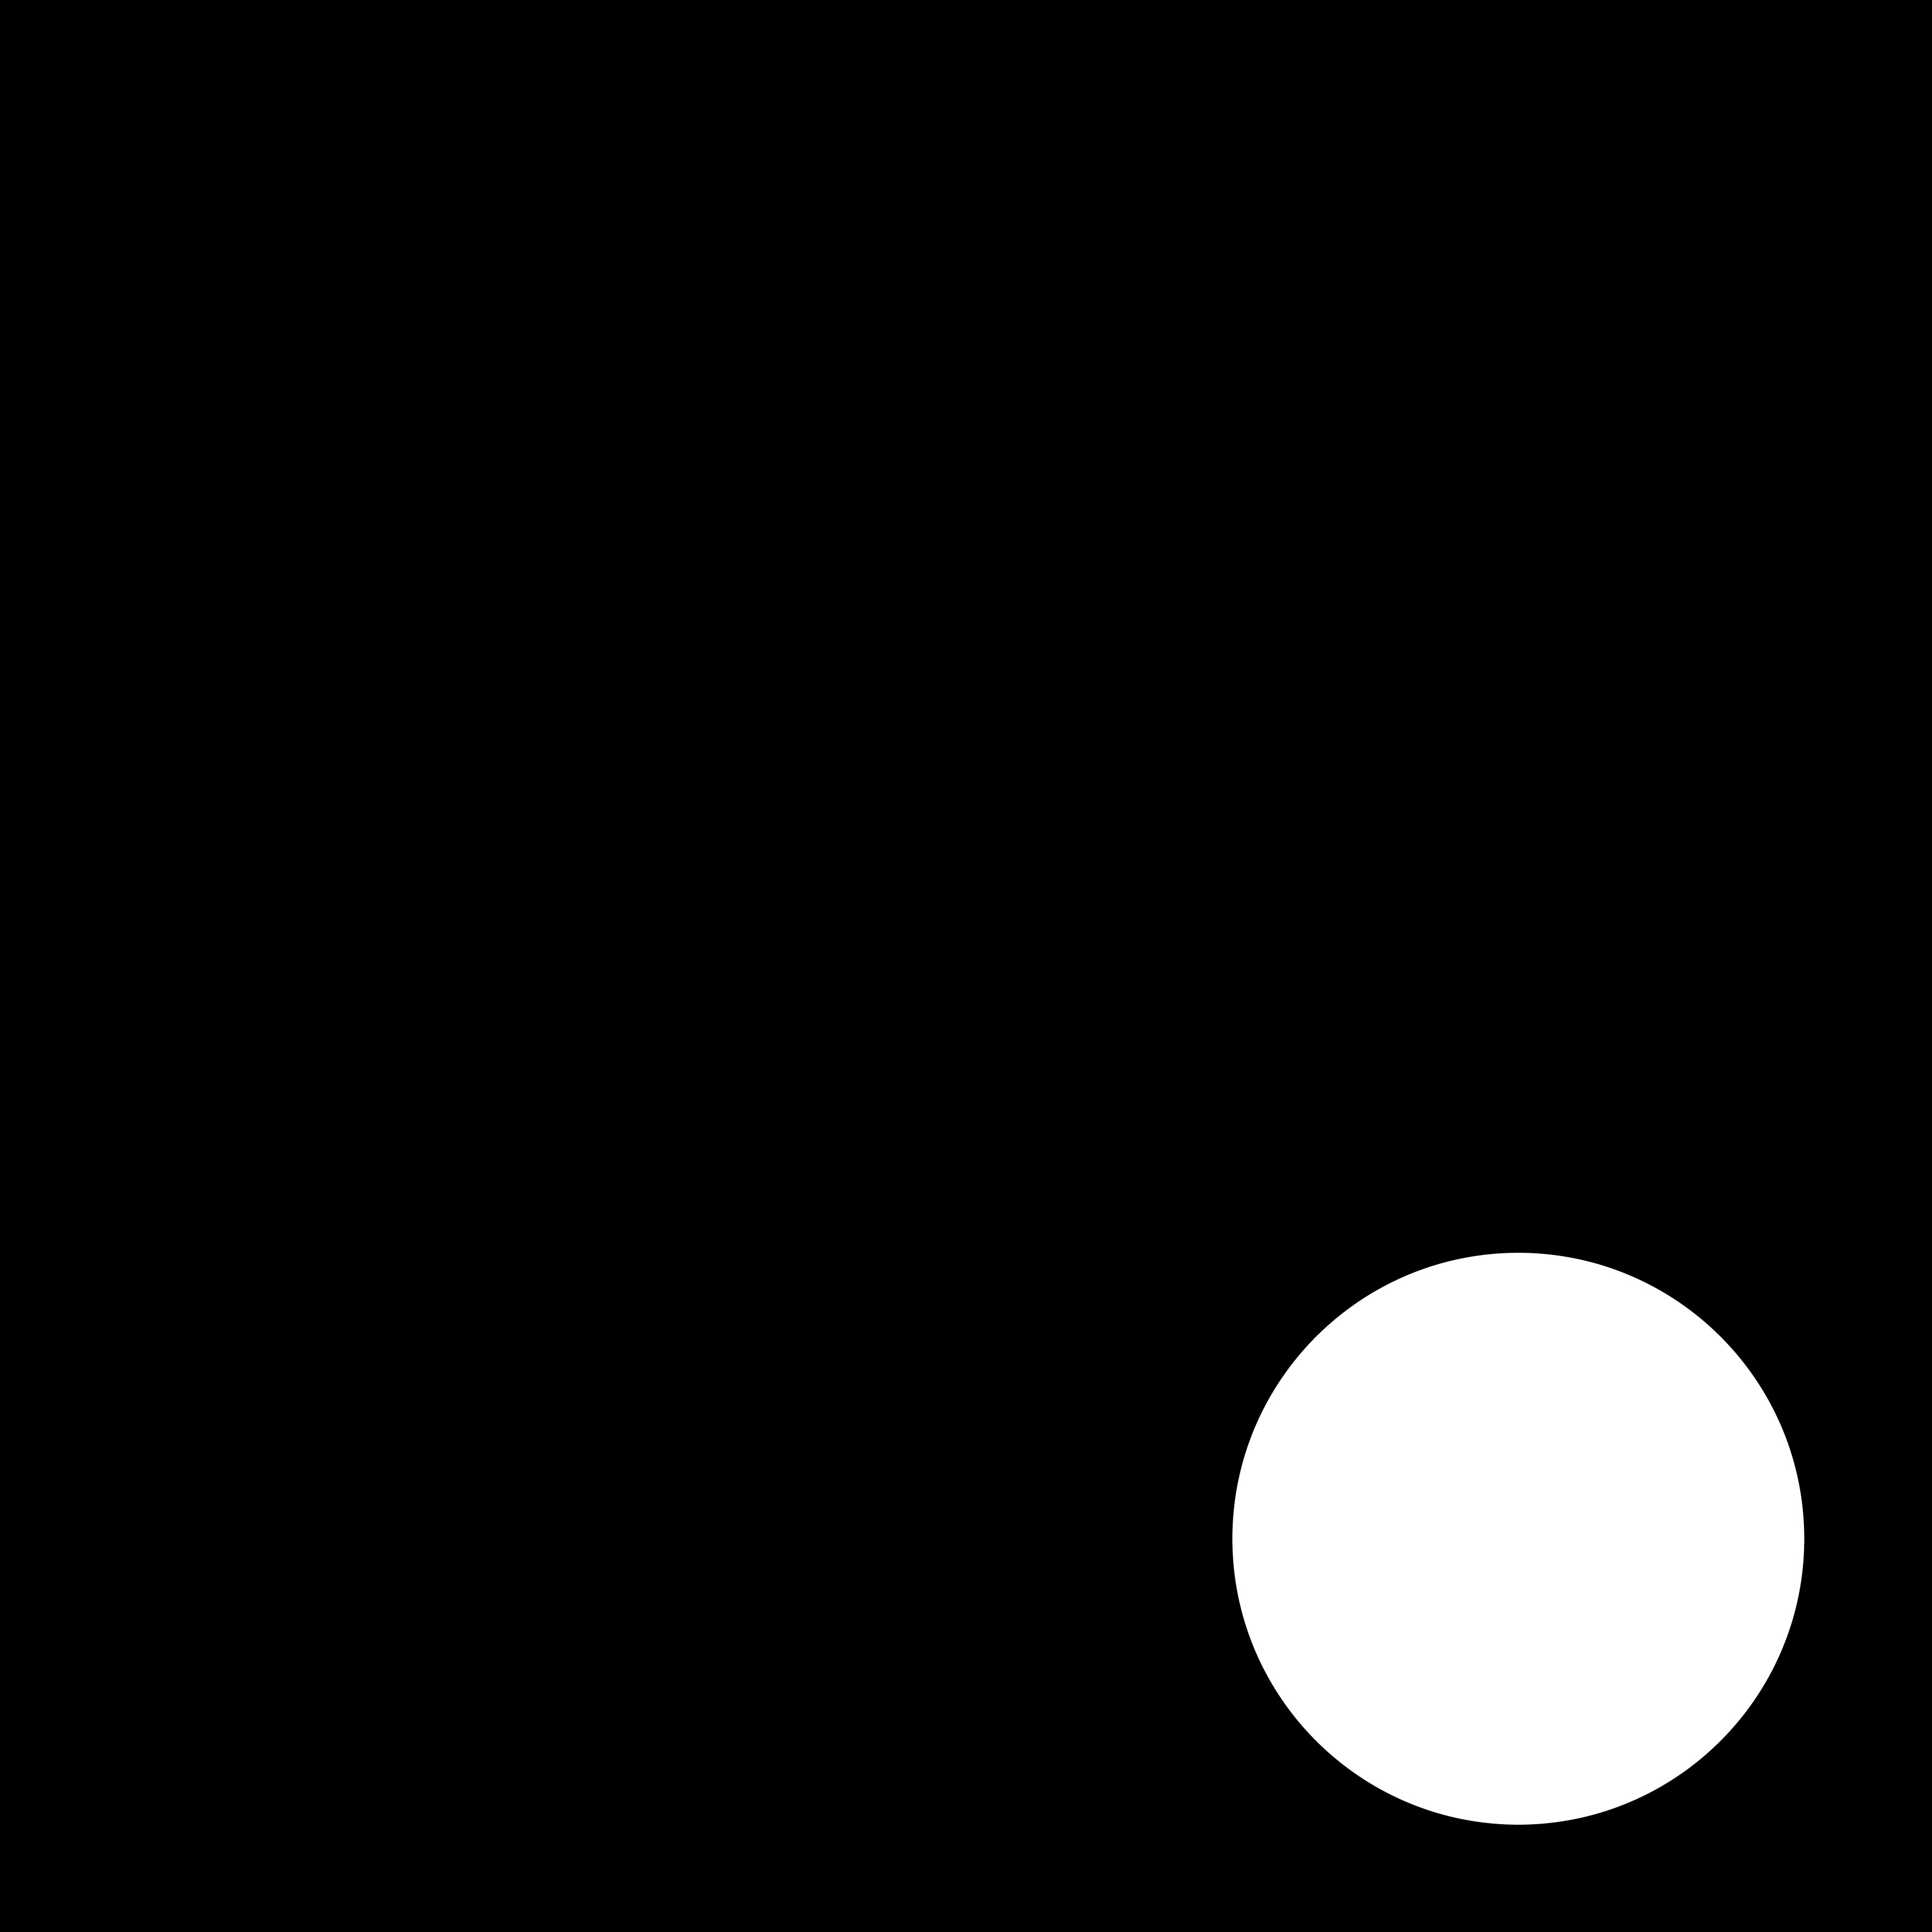

Supplement: Supplementary file 2 [file Hu_Listen_to_the_CVPR_2019_supplemental.pdf › 3386-supp/examples/the modified scheme w.r.t. audio length/fifth lesson/bottom-right.jpg]

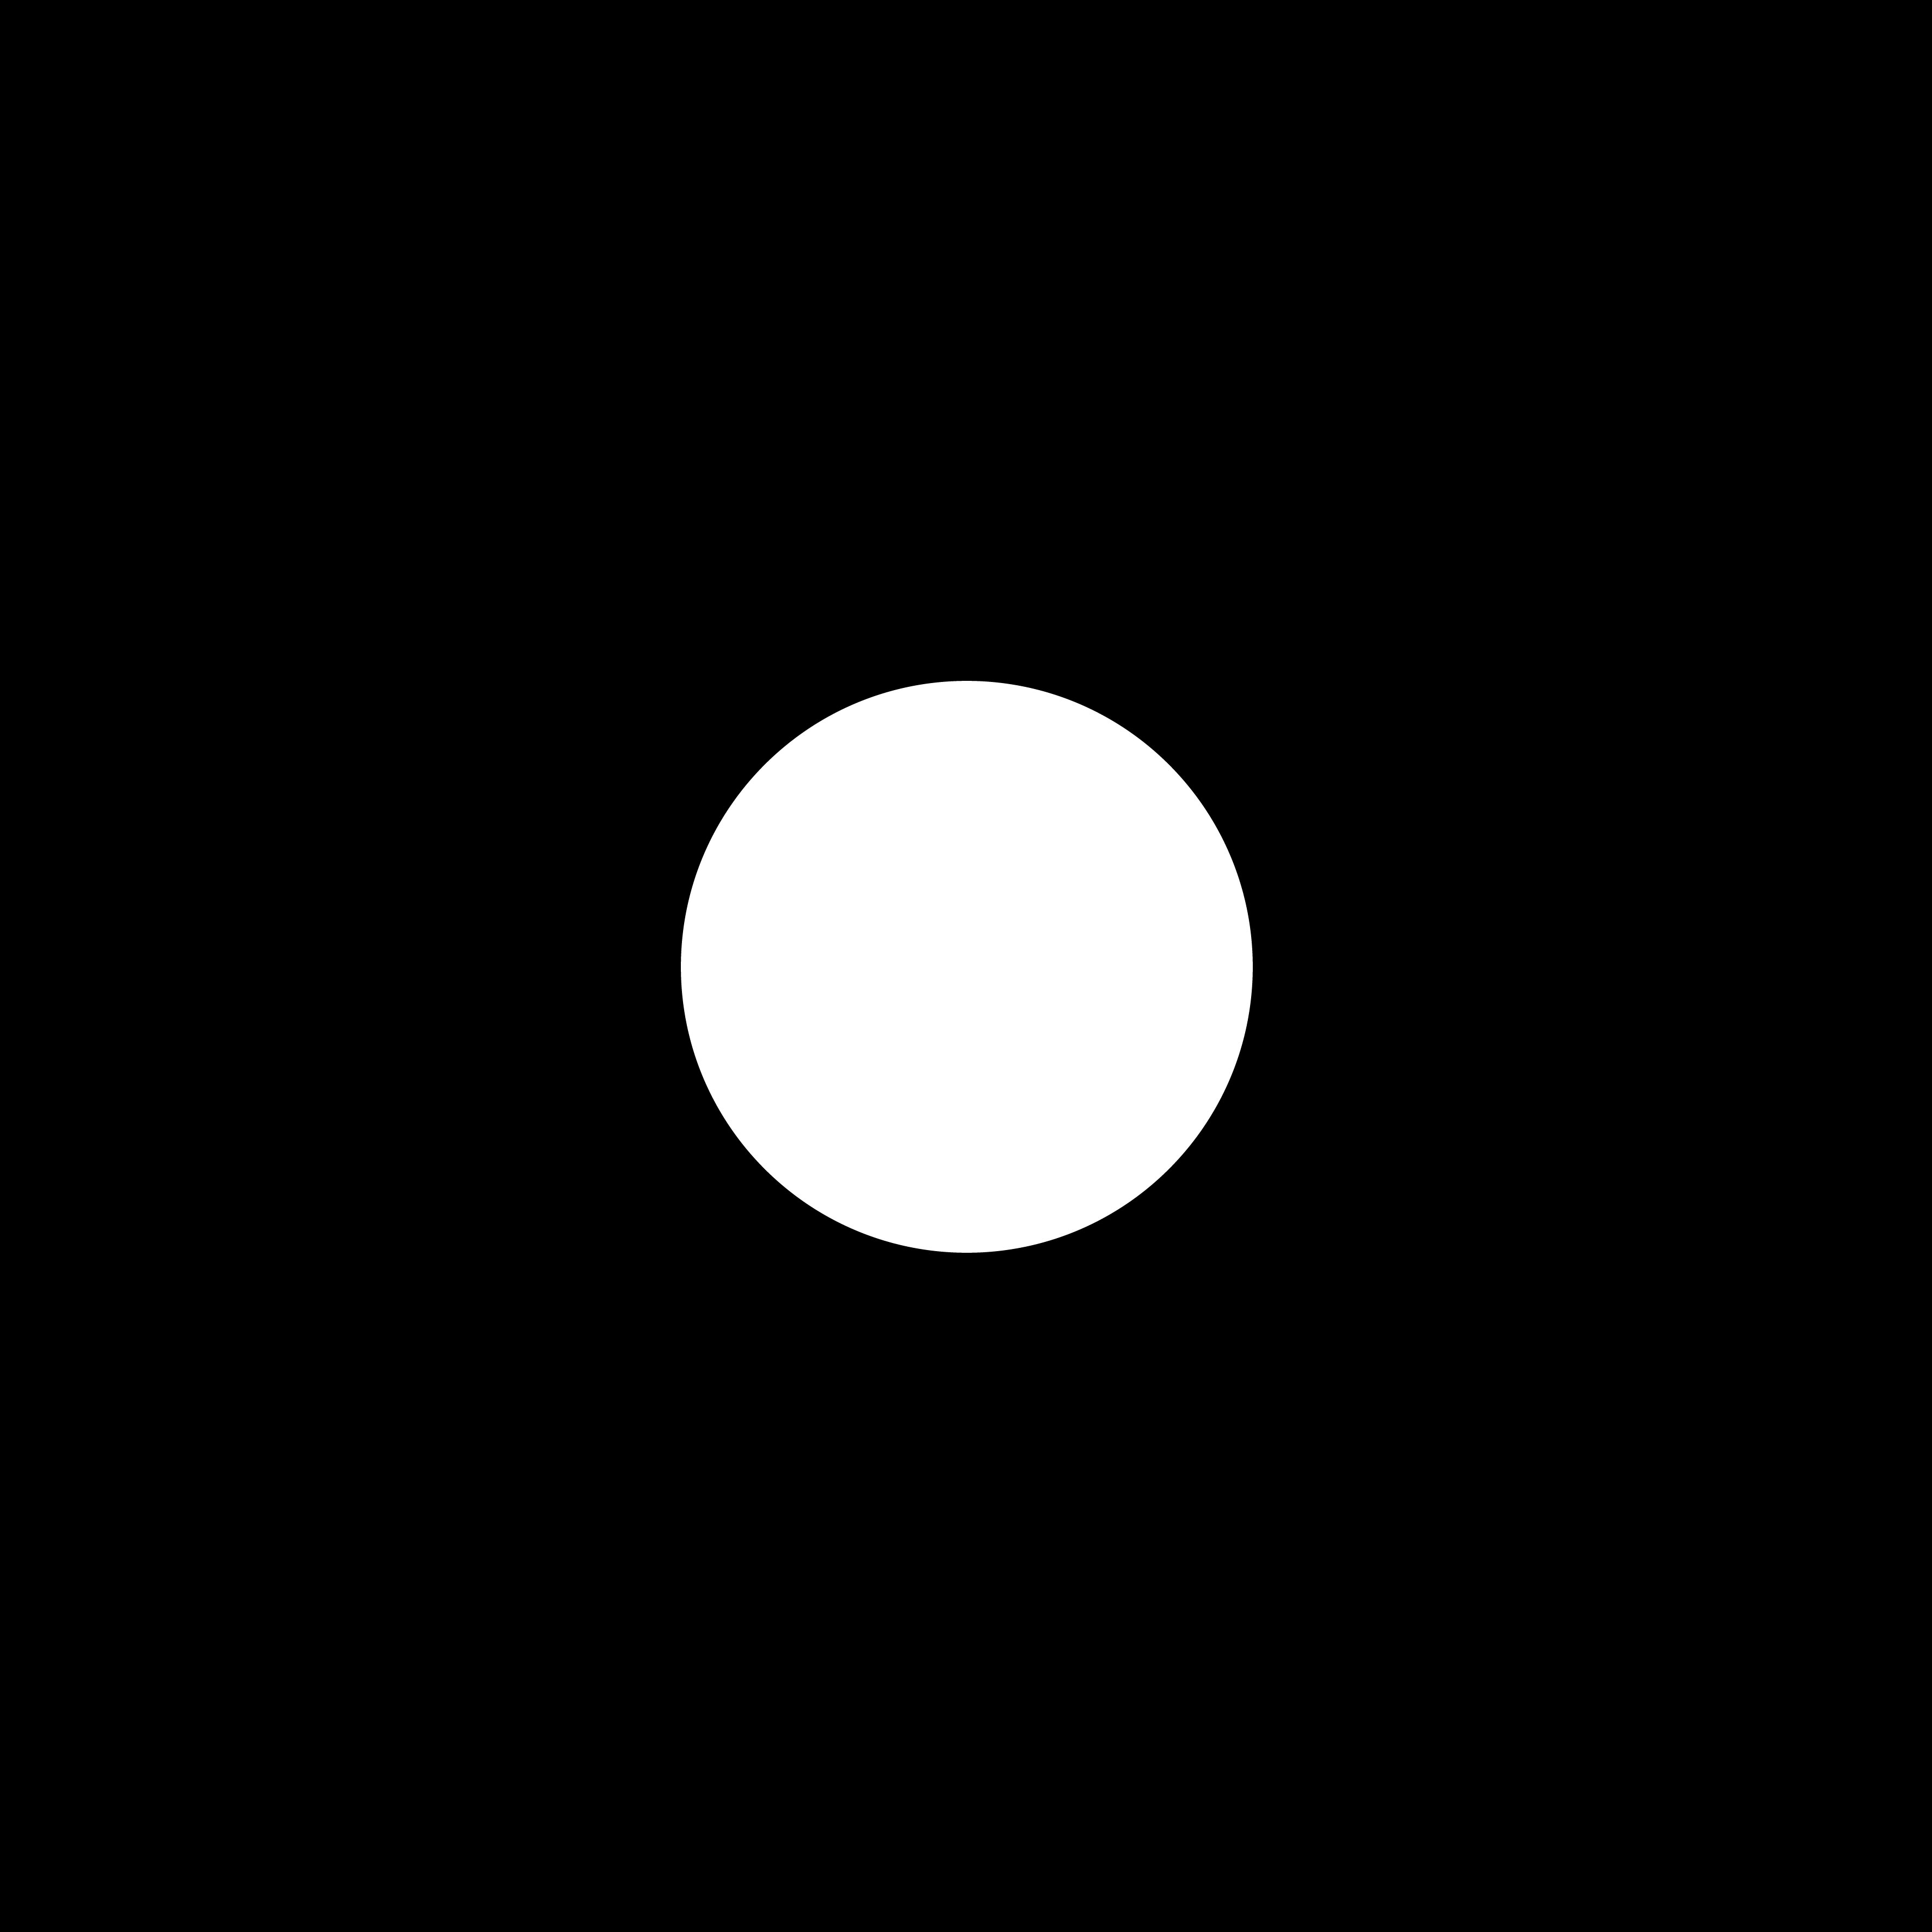

Supplement: Supplementary file 2 [file Hu_Listen_to_the_CVPR_2019_supplemental.pdf › 3386-supp/examples/the modified scheme w.r.t. audio length/fifth lesson/center.jpg]

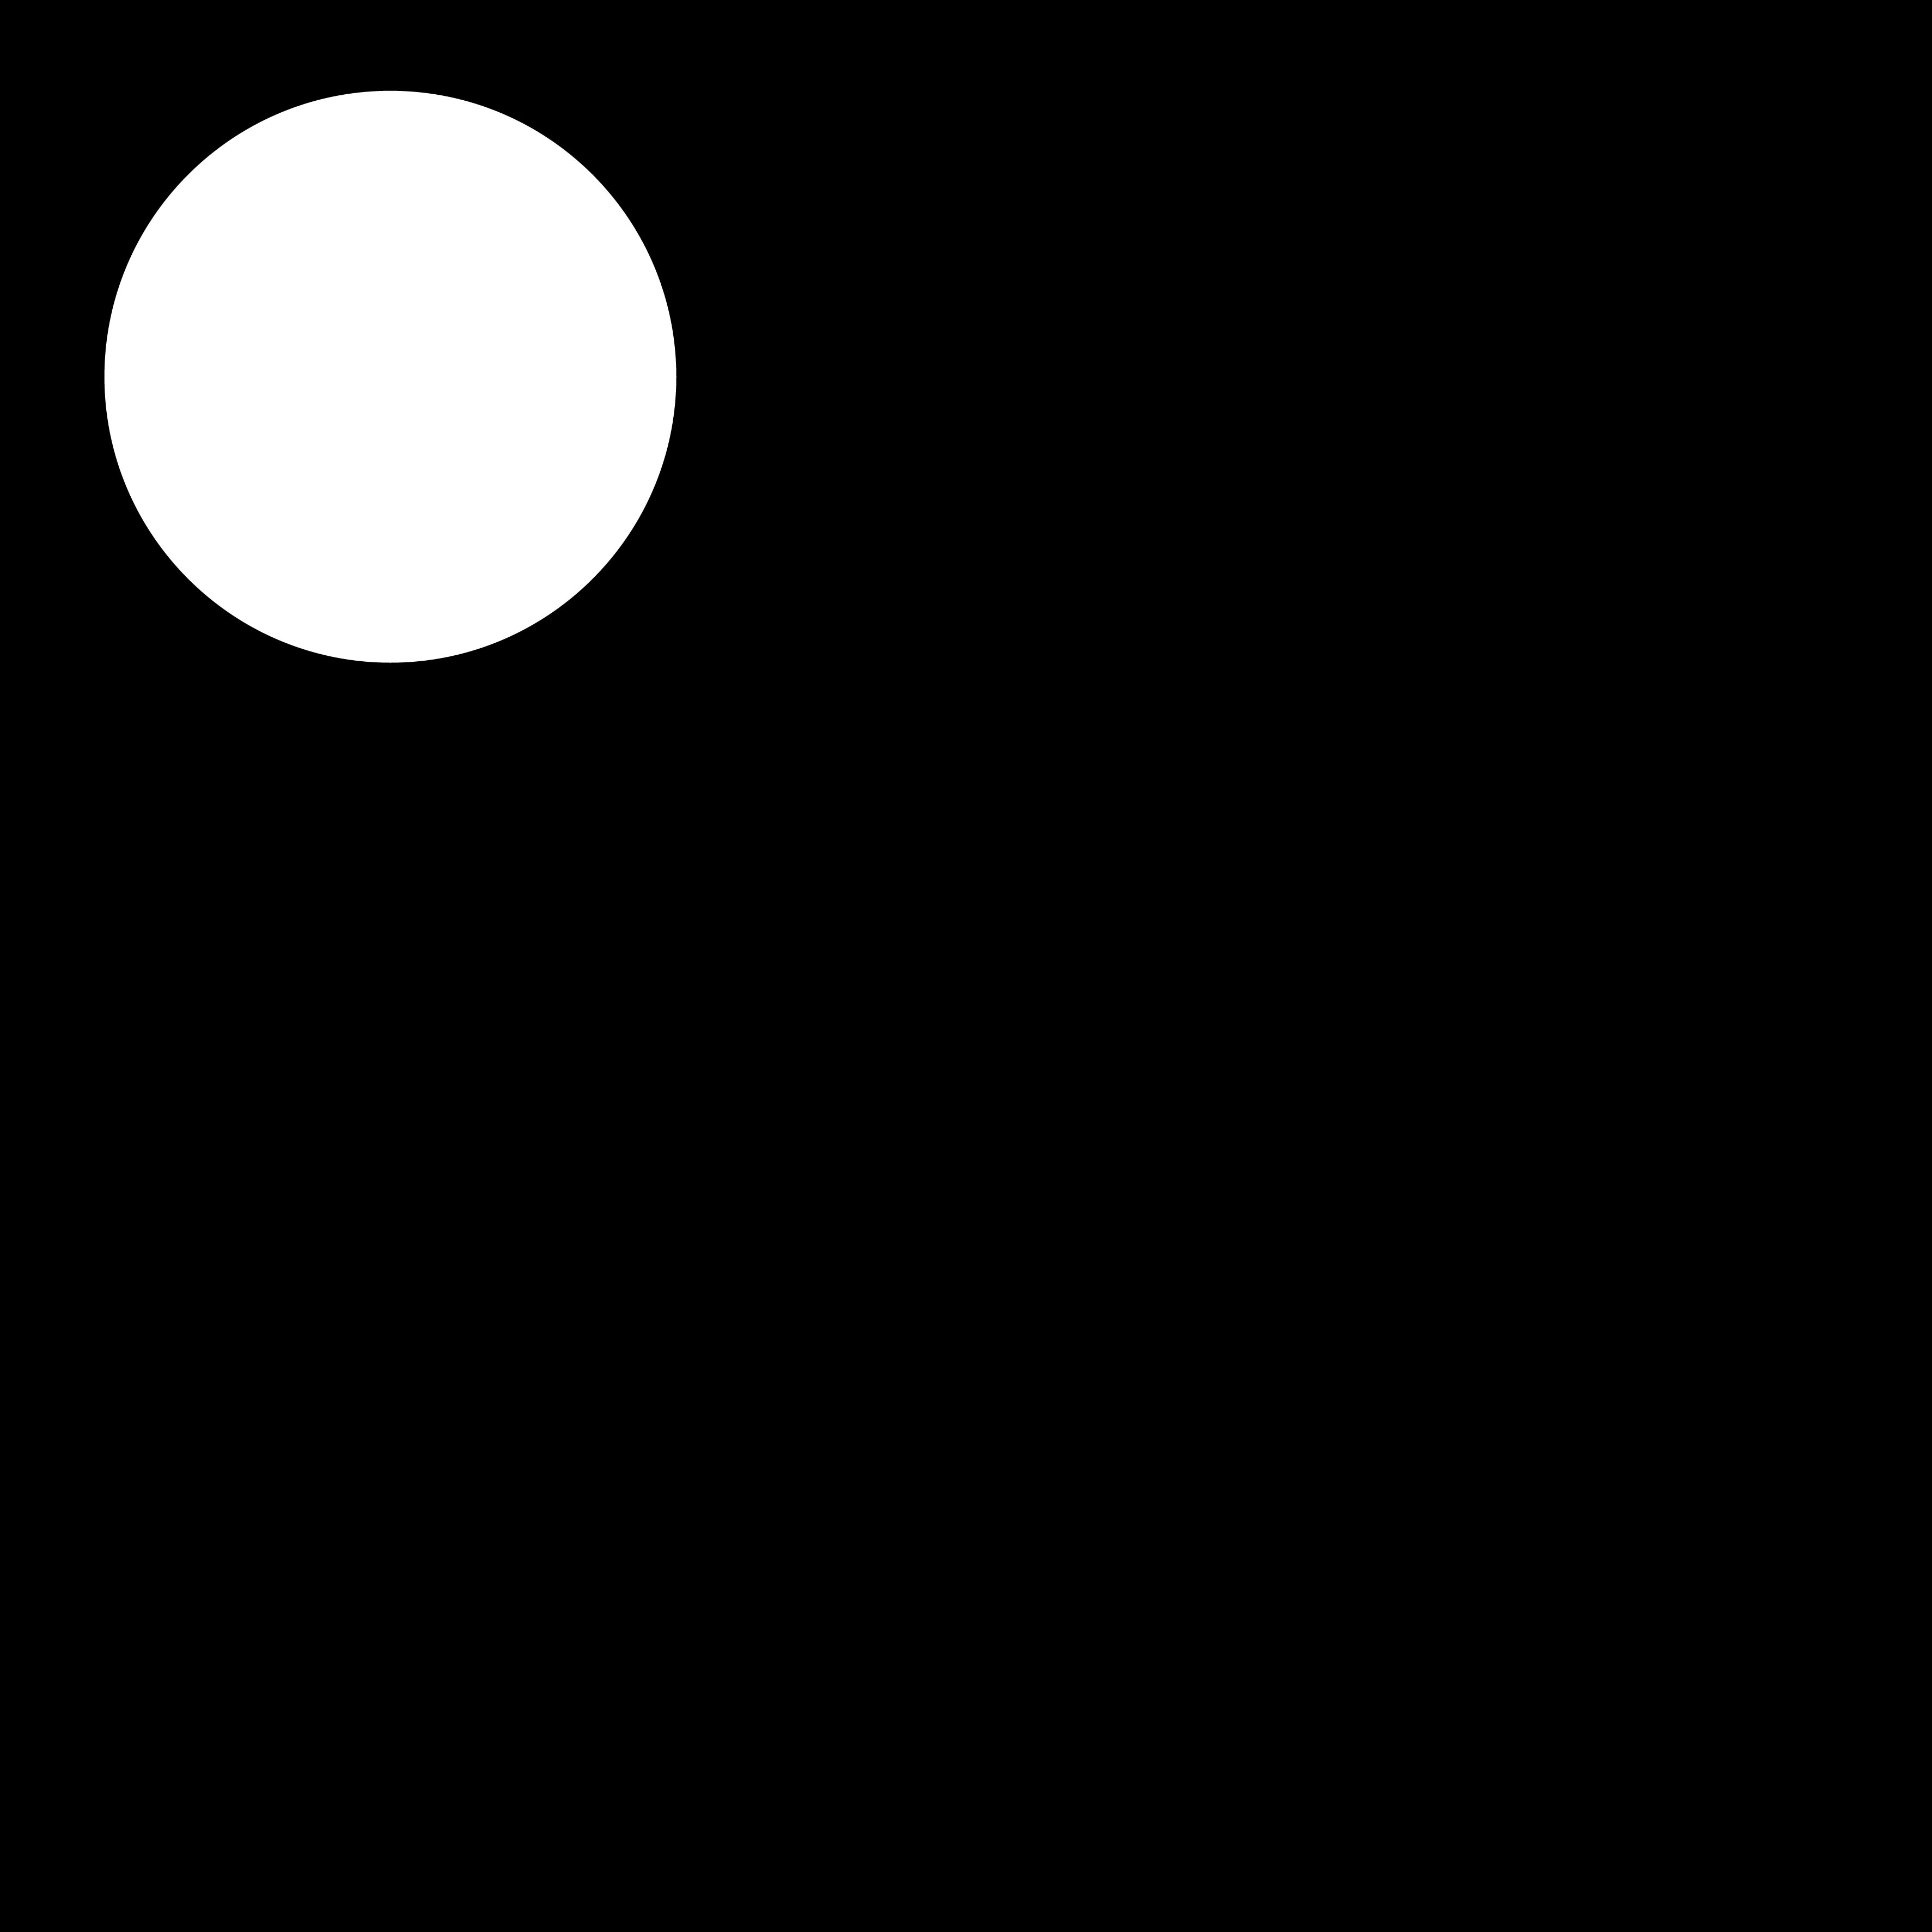

Supplement: Supplementary file 2 [file Hu_Listen_to_the_CVPR_2019_supplemental.pdf › 3386-supp/examples/the modified scheme w.r.t. audio length/fifth lesson/upper-left.jpg]

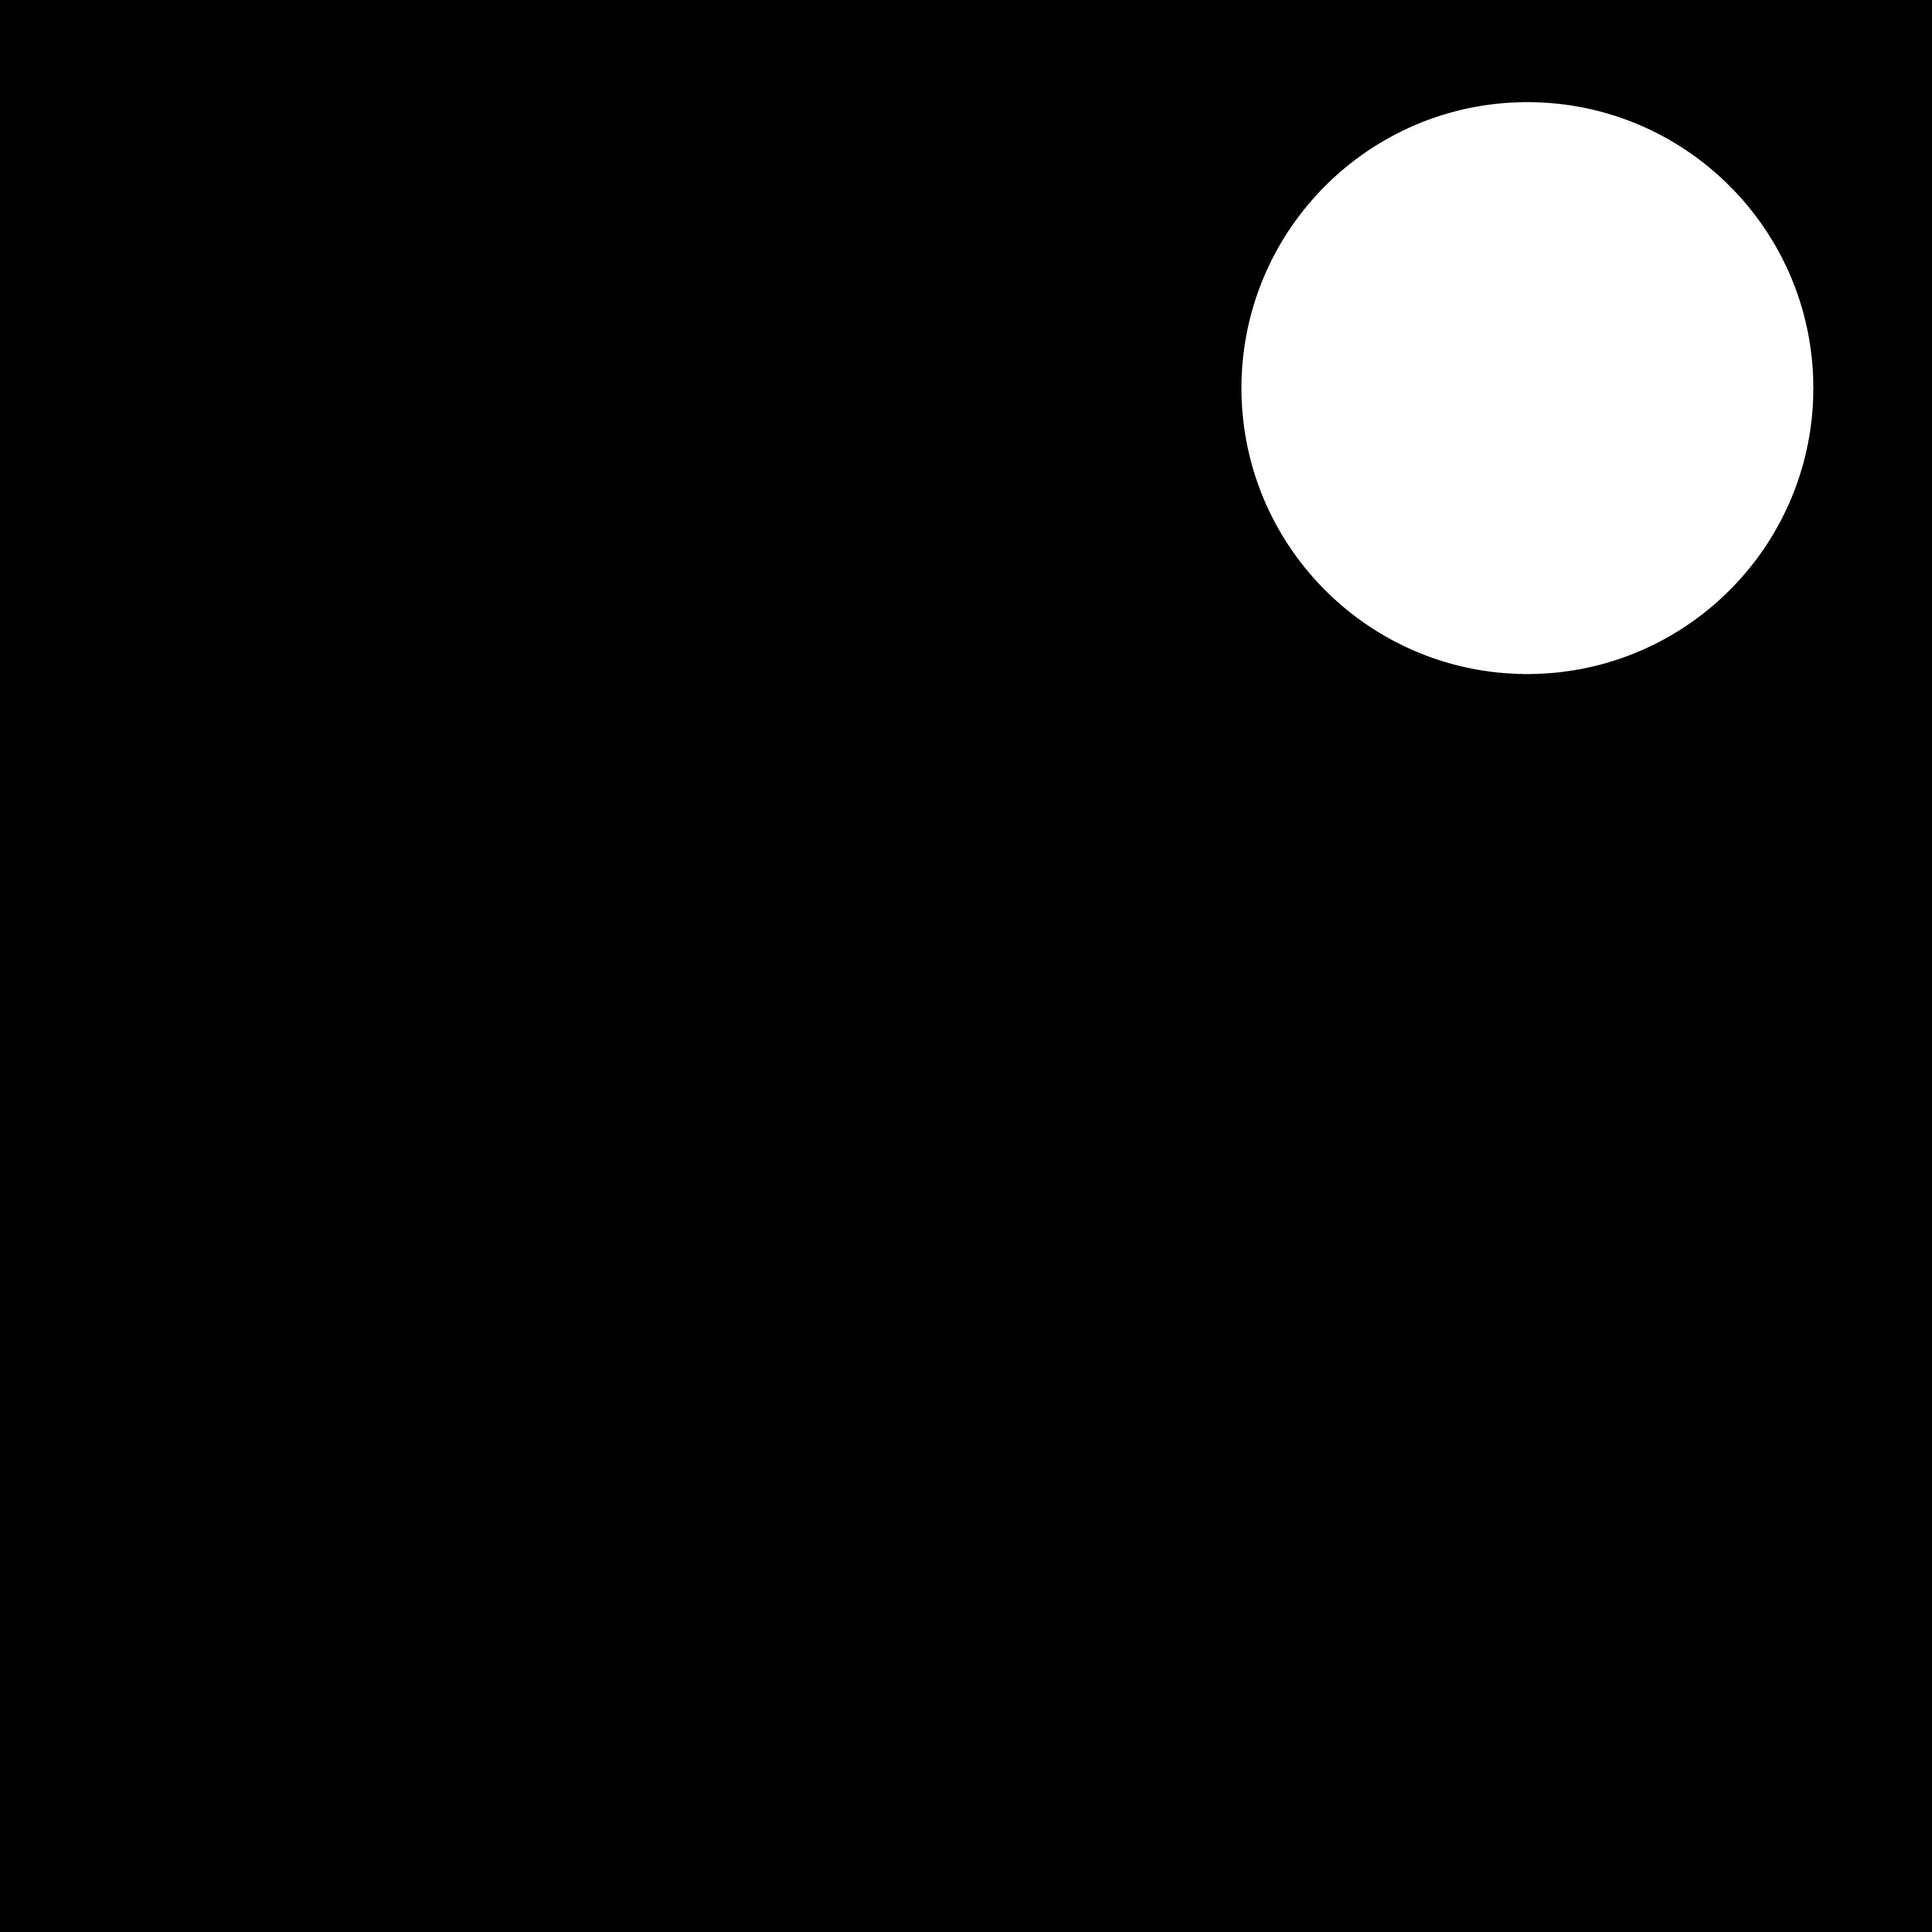

Supplement: Supplementary file 2 [file Hu_Listen_to_the_CVPR_2019_supplemental.pdf › 3386-supp/examples/the modified scheme w.r.t. audio length/fifth lesson/upper-right.jpg]

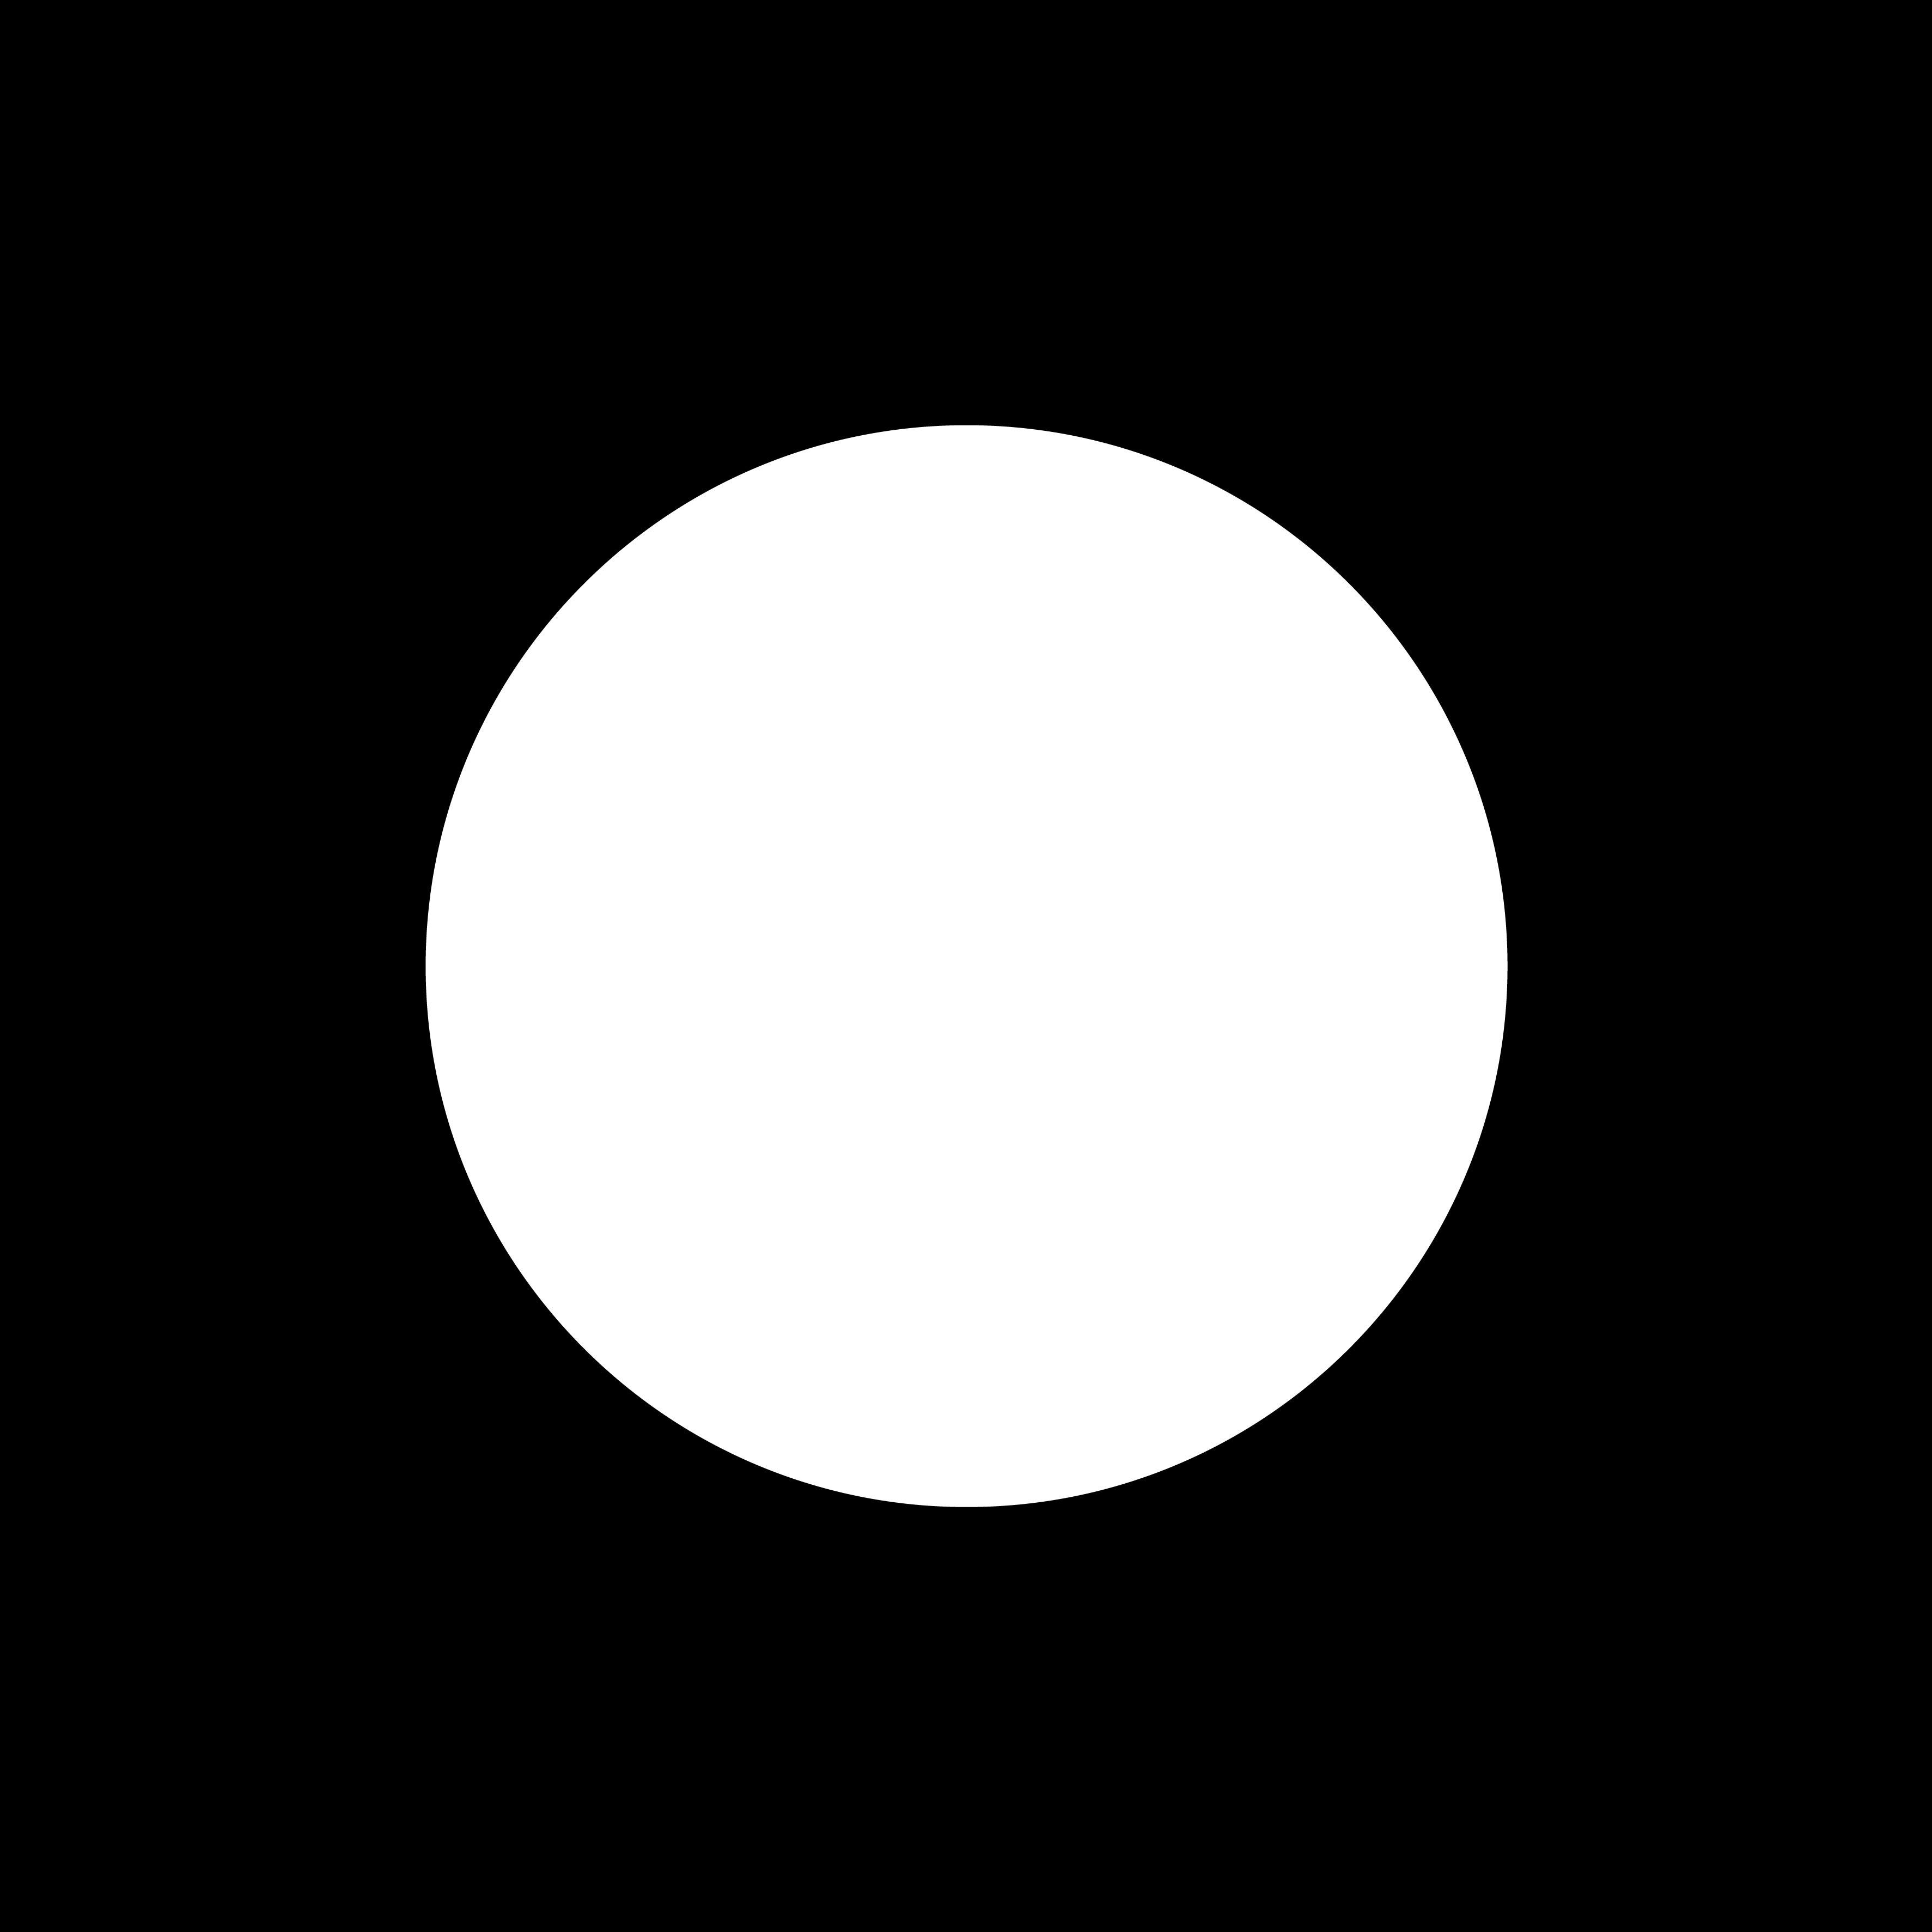

Supplement: Supplementary file 2 [file Hu_Listen_to_the_CVPR_2019_supplemental.pdf › 3386-supp/examples/the modified scheme w.r.t. audio length/first lesson/circle.jpg]

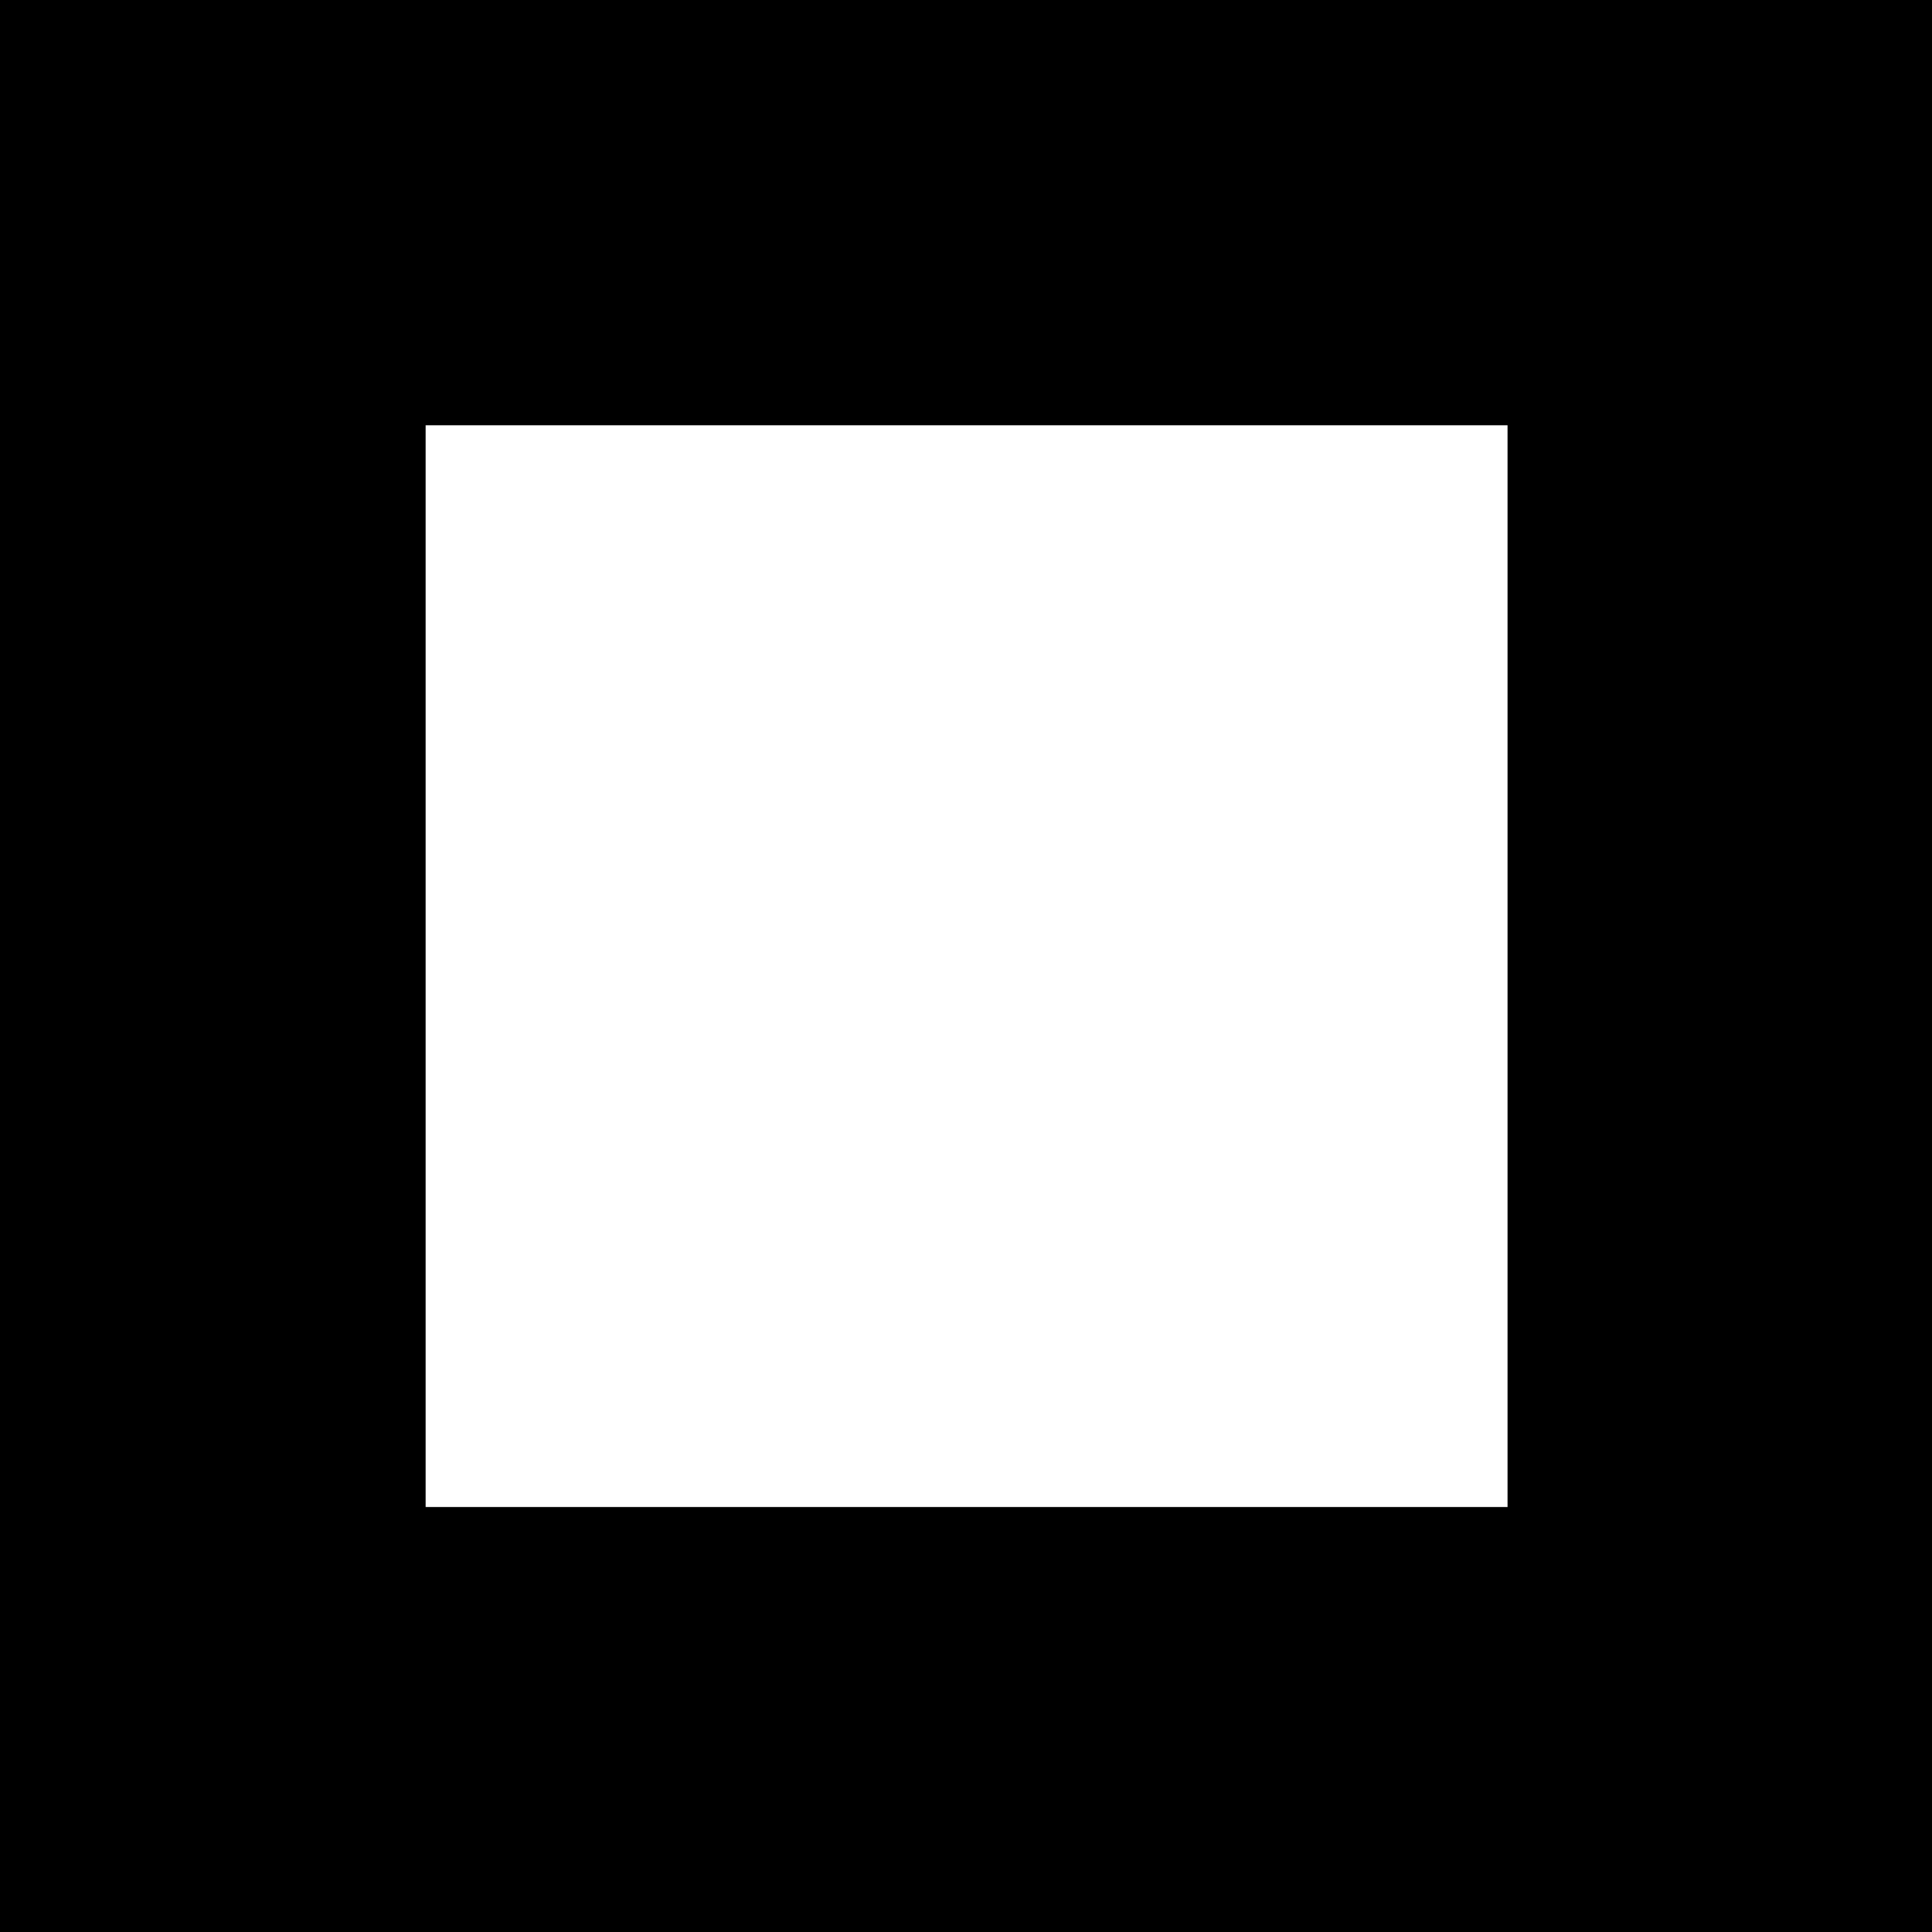

Supplement: Supplementary file 2 [file Hu_Listen_to_the_CVPR_2019_supplemental.pdf › 3386-supp/examples/the modified scheme w.r.t. audio length/first lesson/square.jpg]

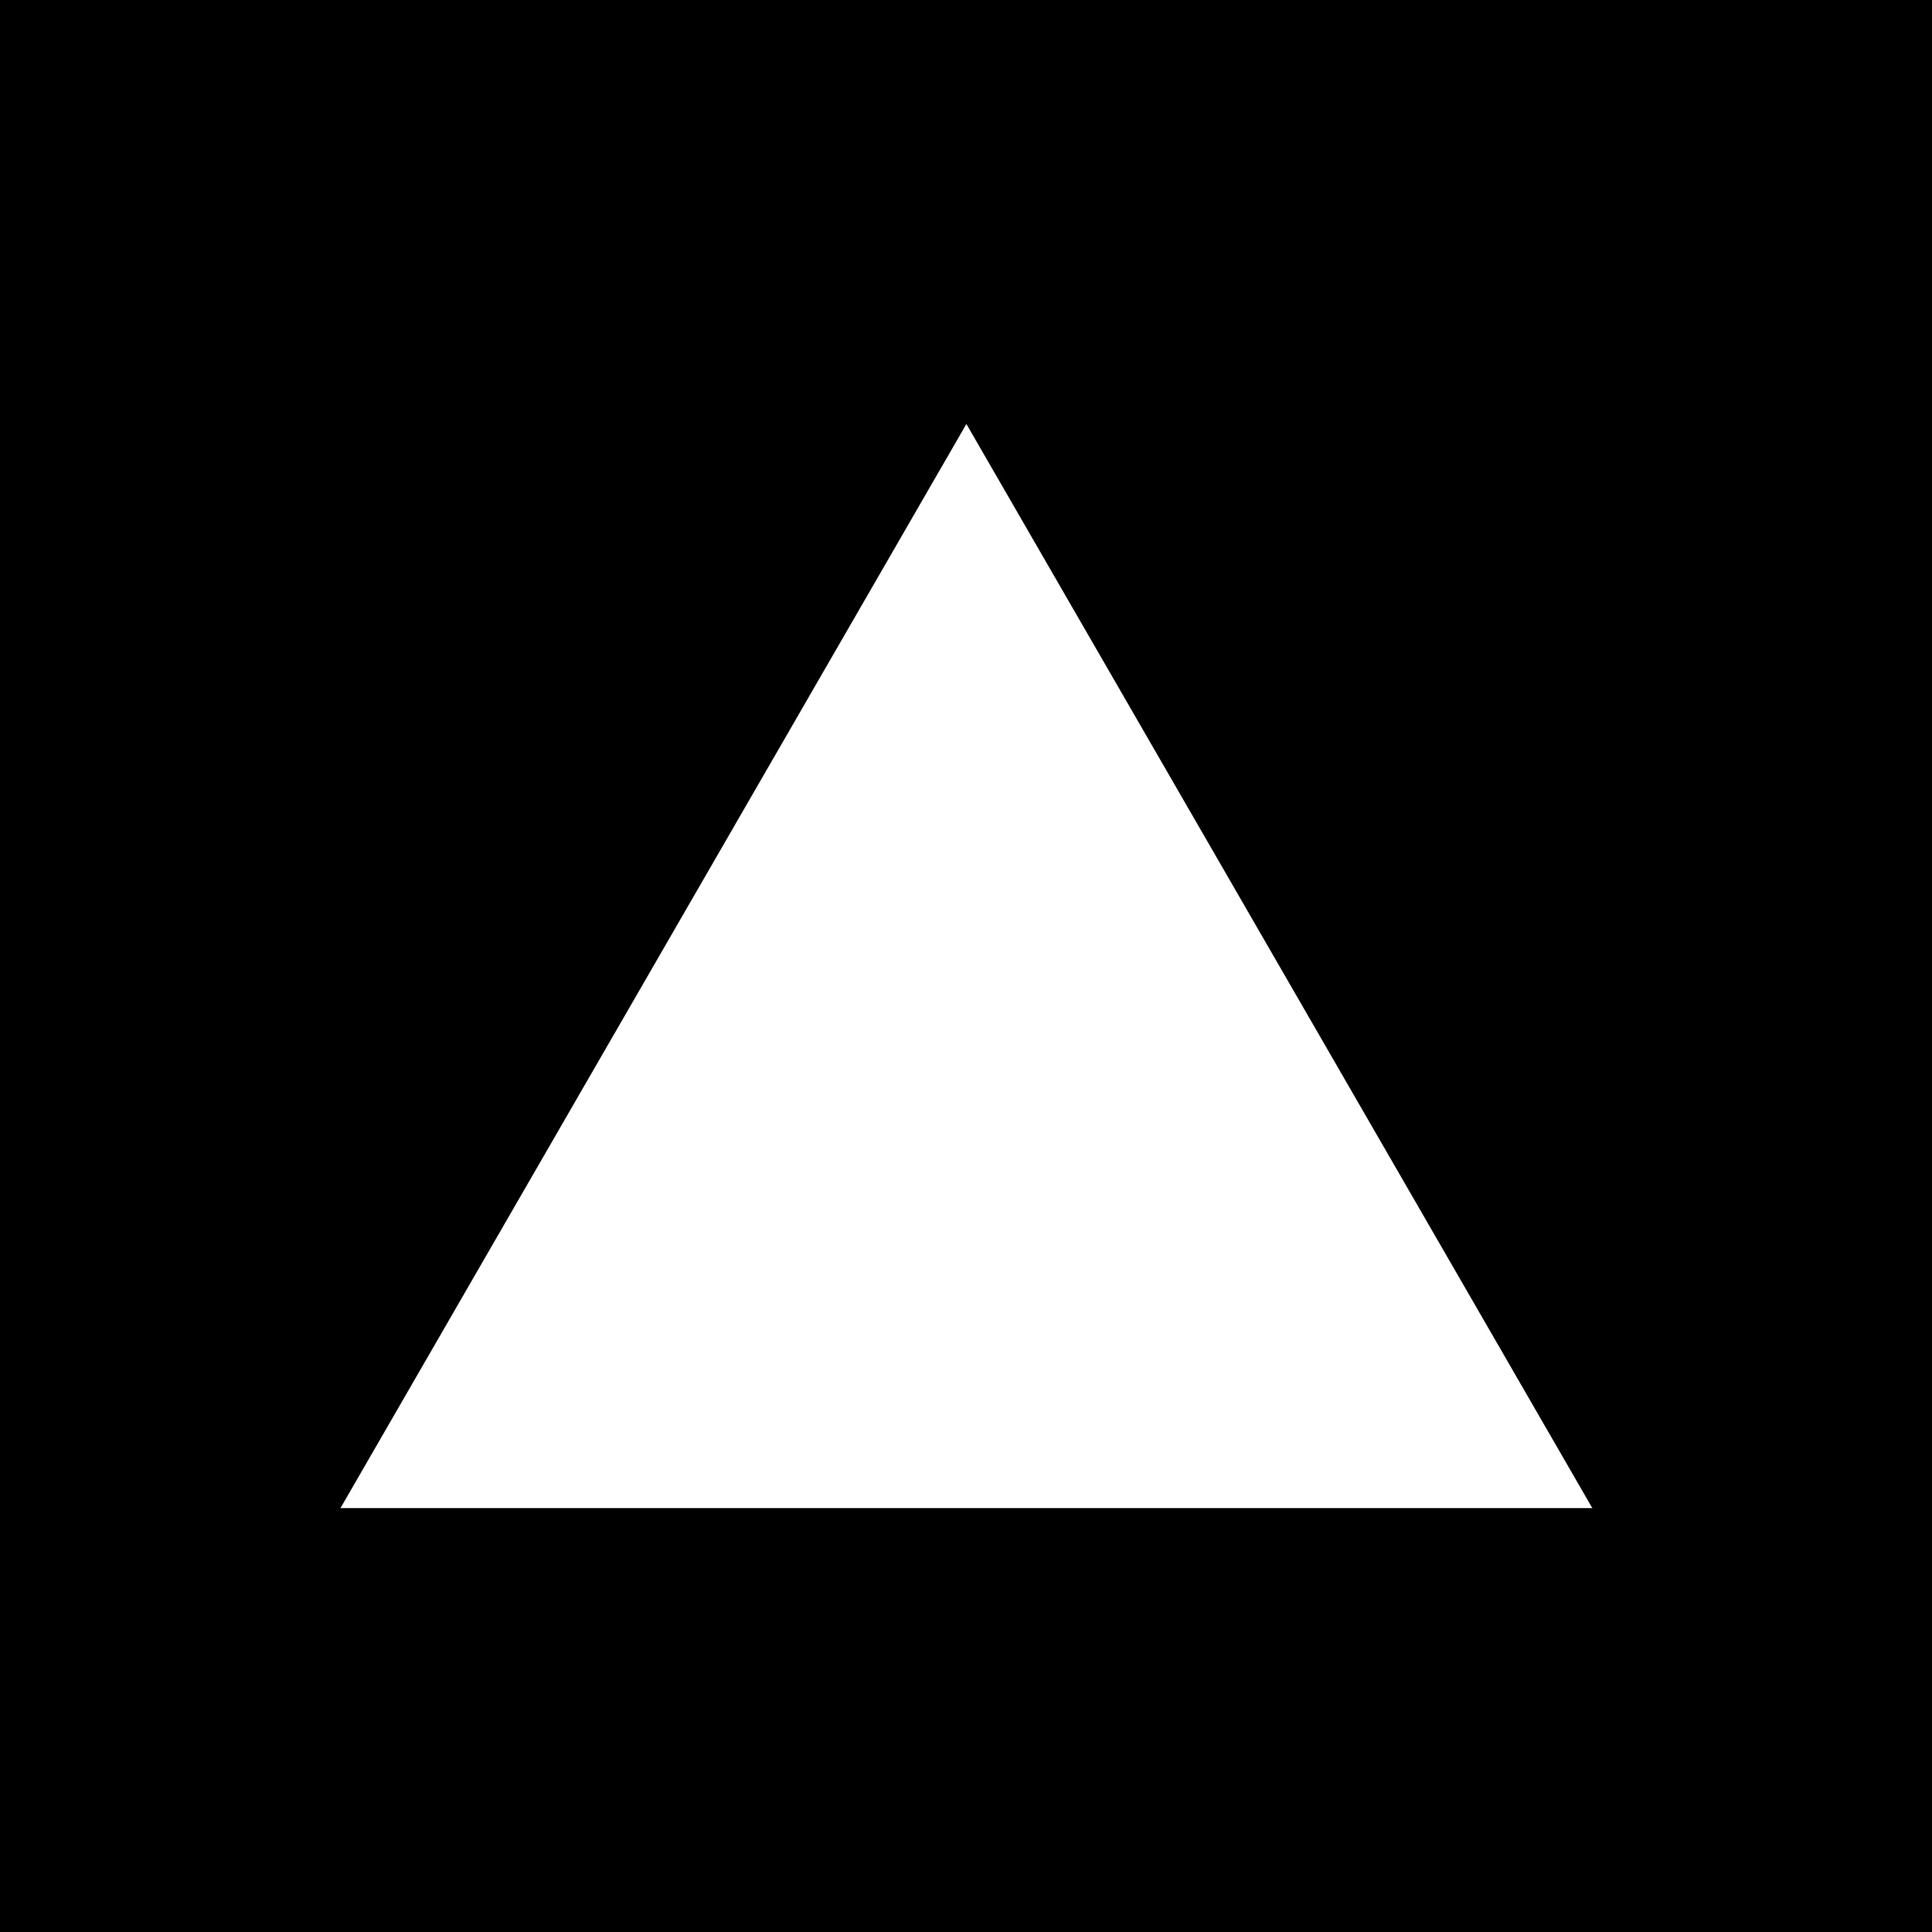

Supplement: Supplementary file 2 [file Hu_Listen_to_the_CVPR_2019_supplemental.pdf › 3386-supp/examples/the modified scheme w.r.t. audio length/first lesson/triangle.jpg]

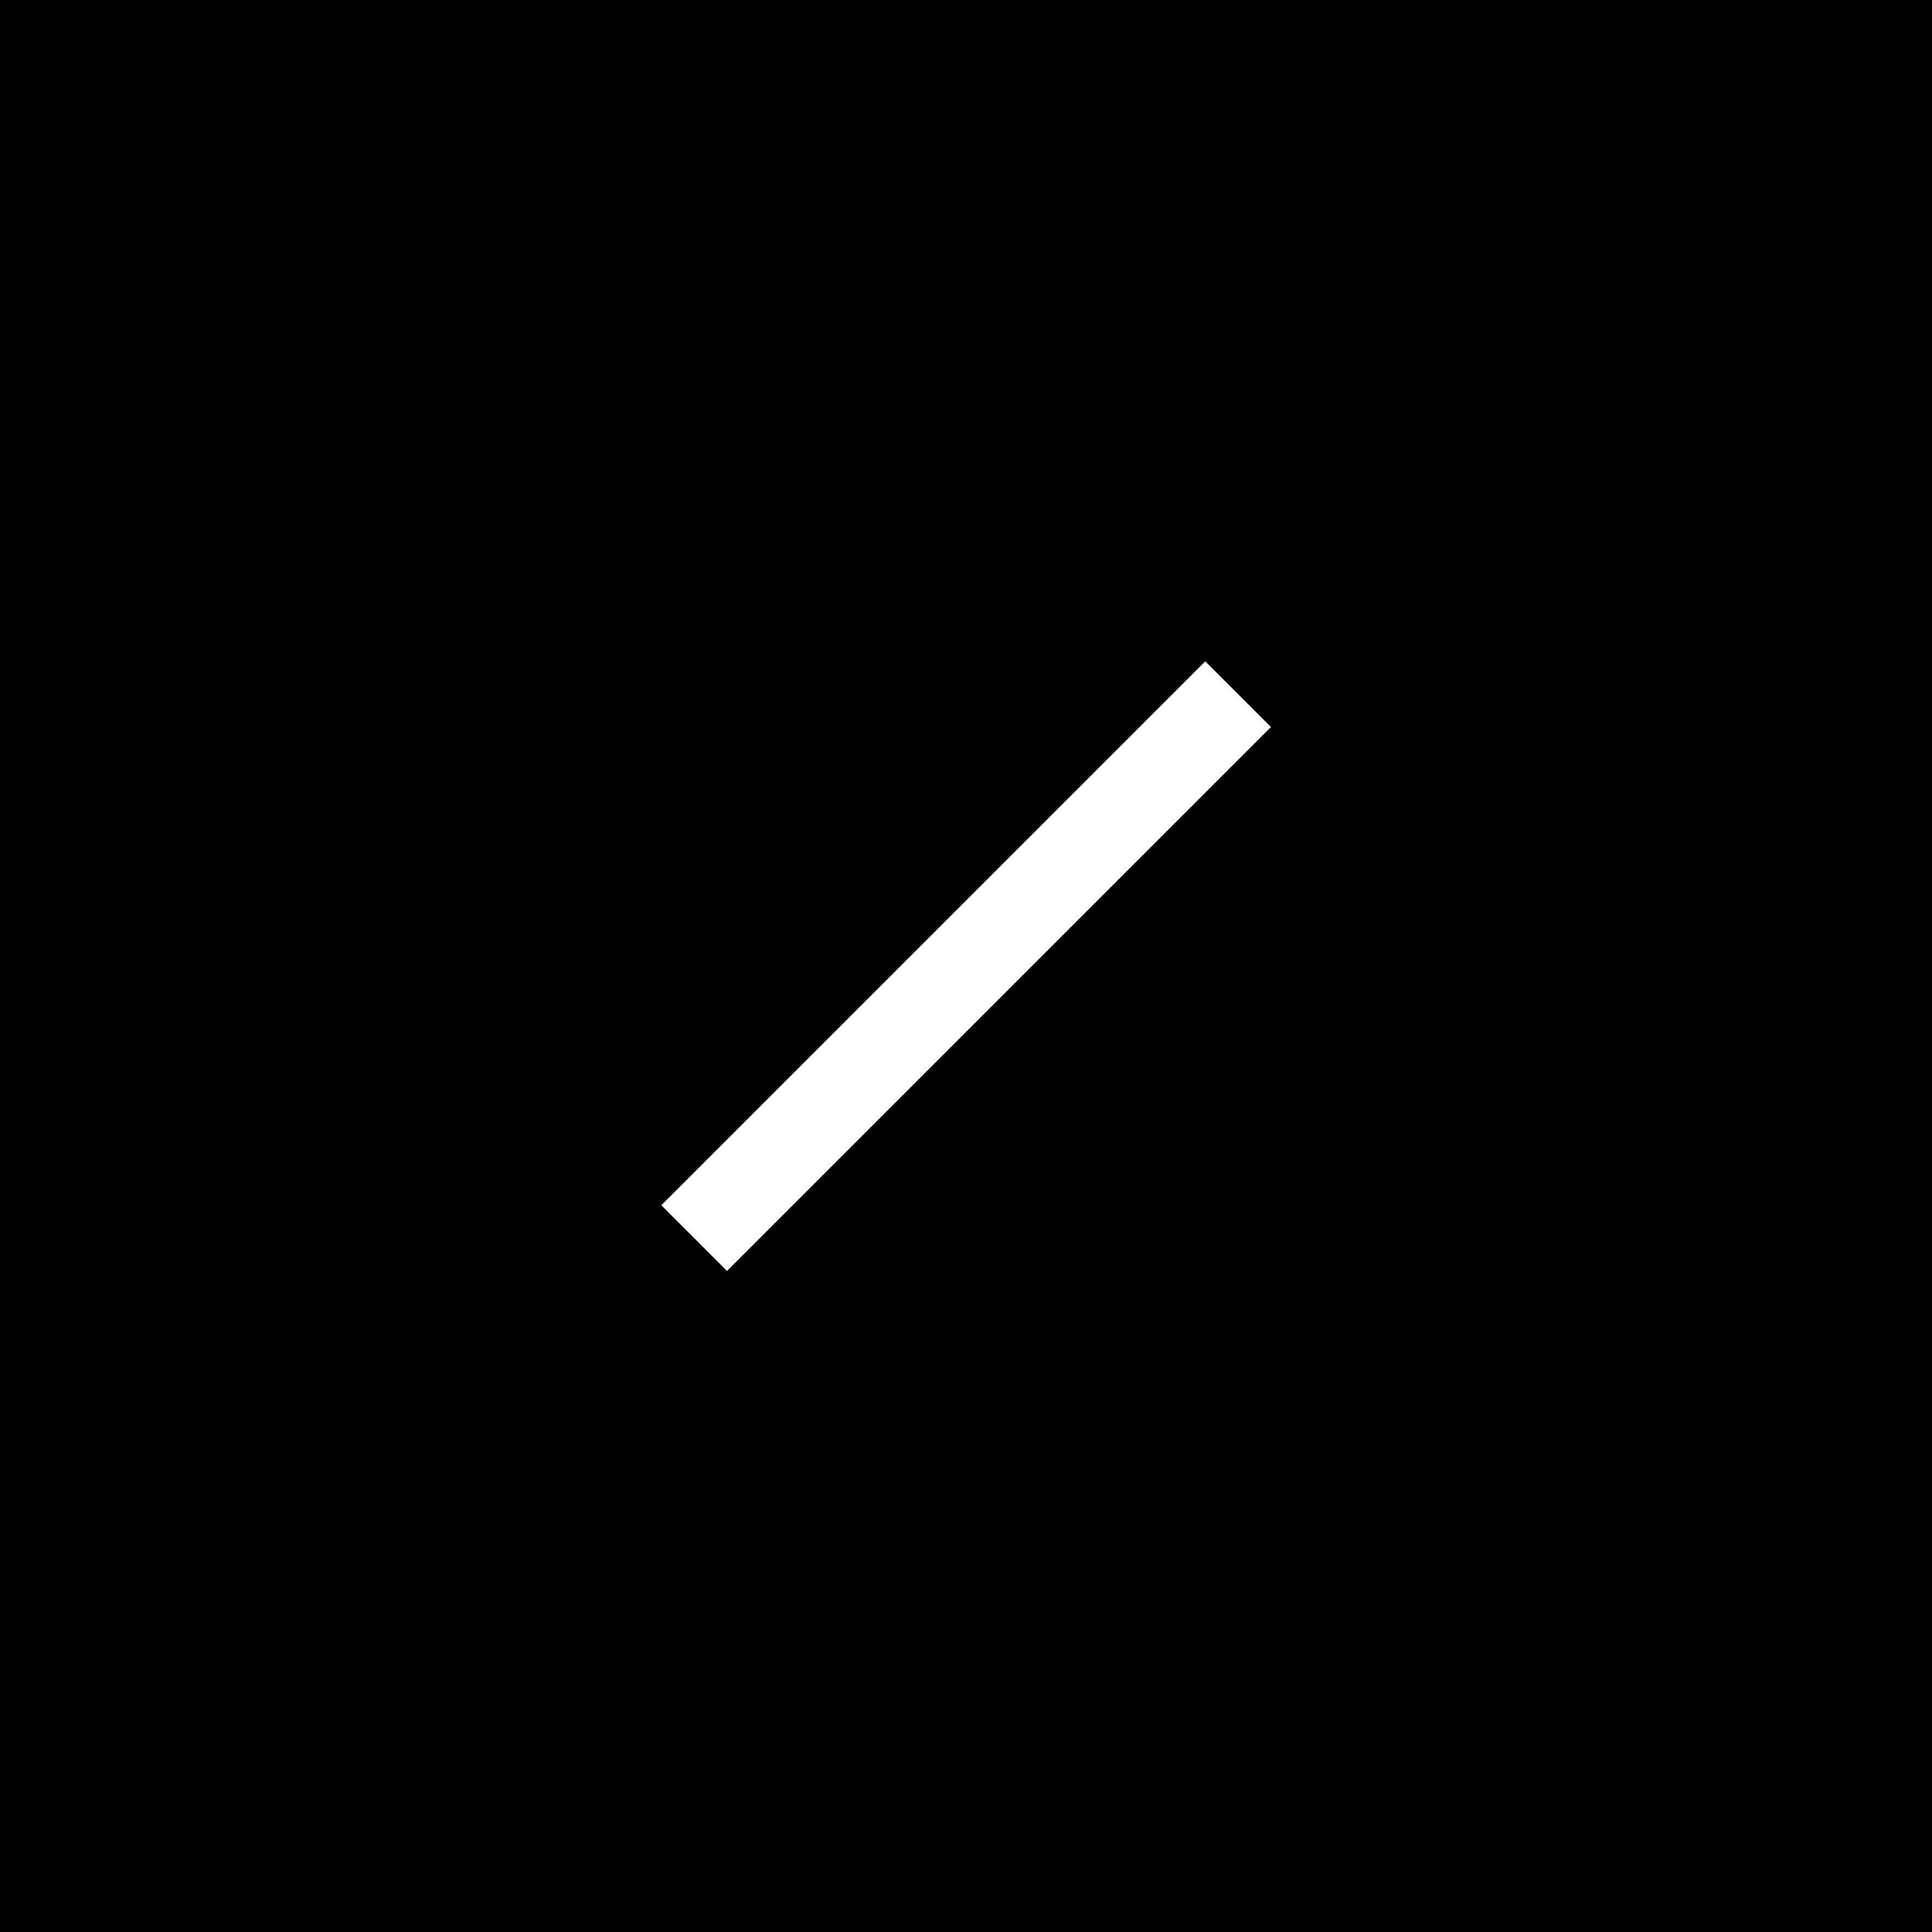

Supplement: Supplementary file 2 [file Hu_Listen_to_the_CVPR_2019_supplemental.pdf › 3386-supp/examples/the modified scheme w.r.t. audio length/fourth lesson/120.jpg]

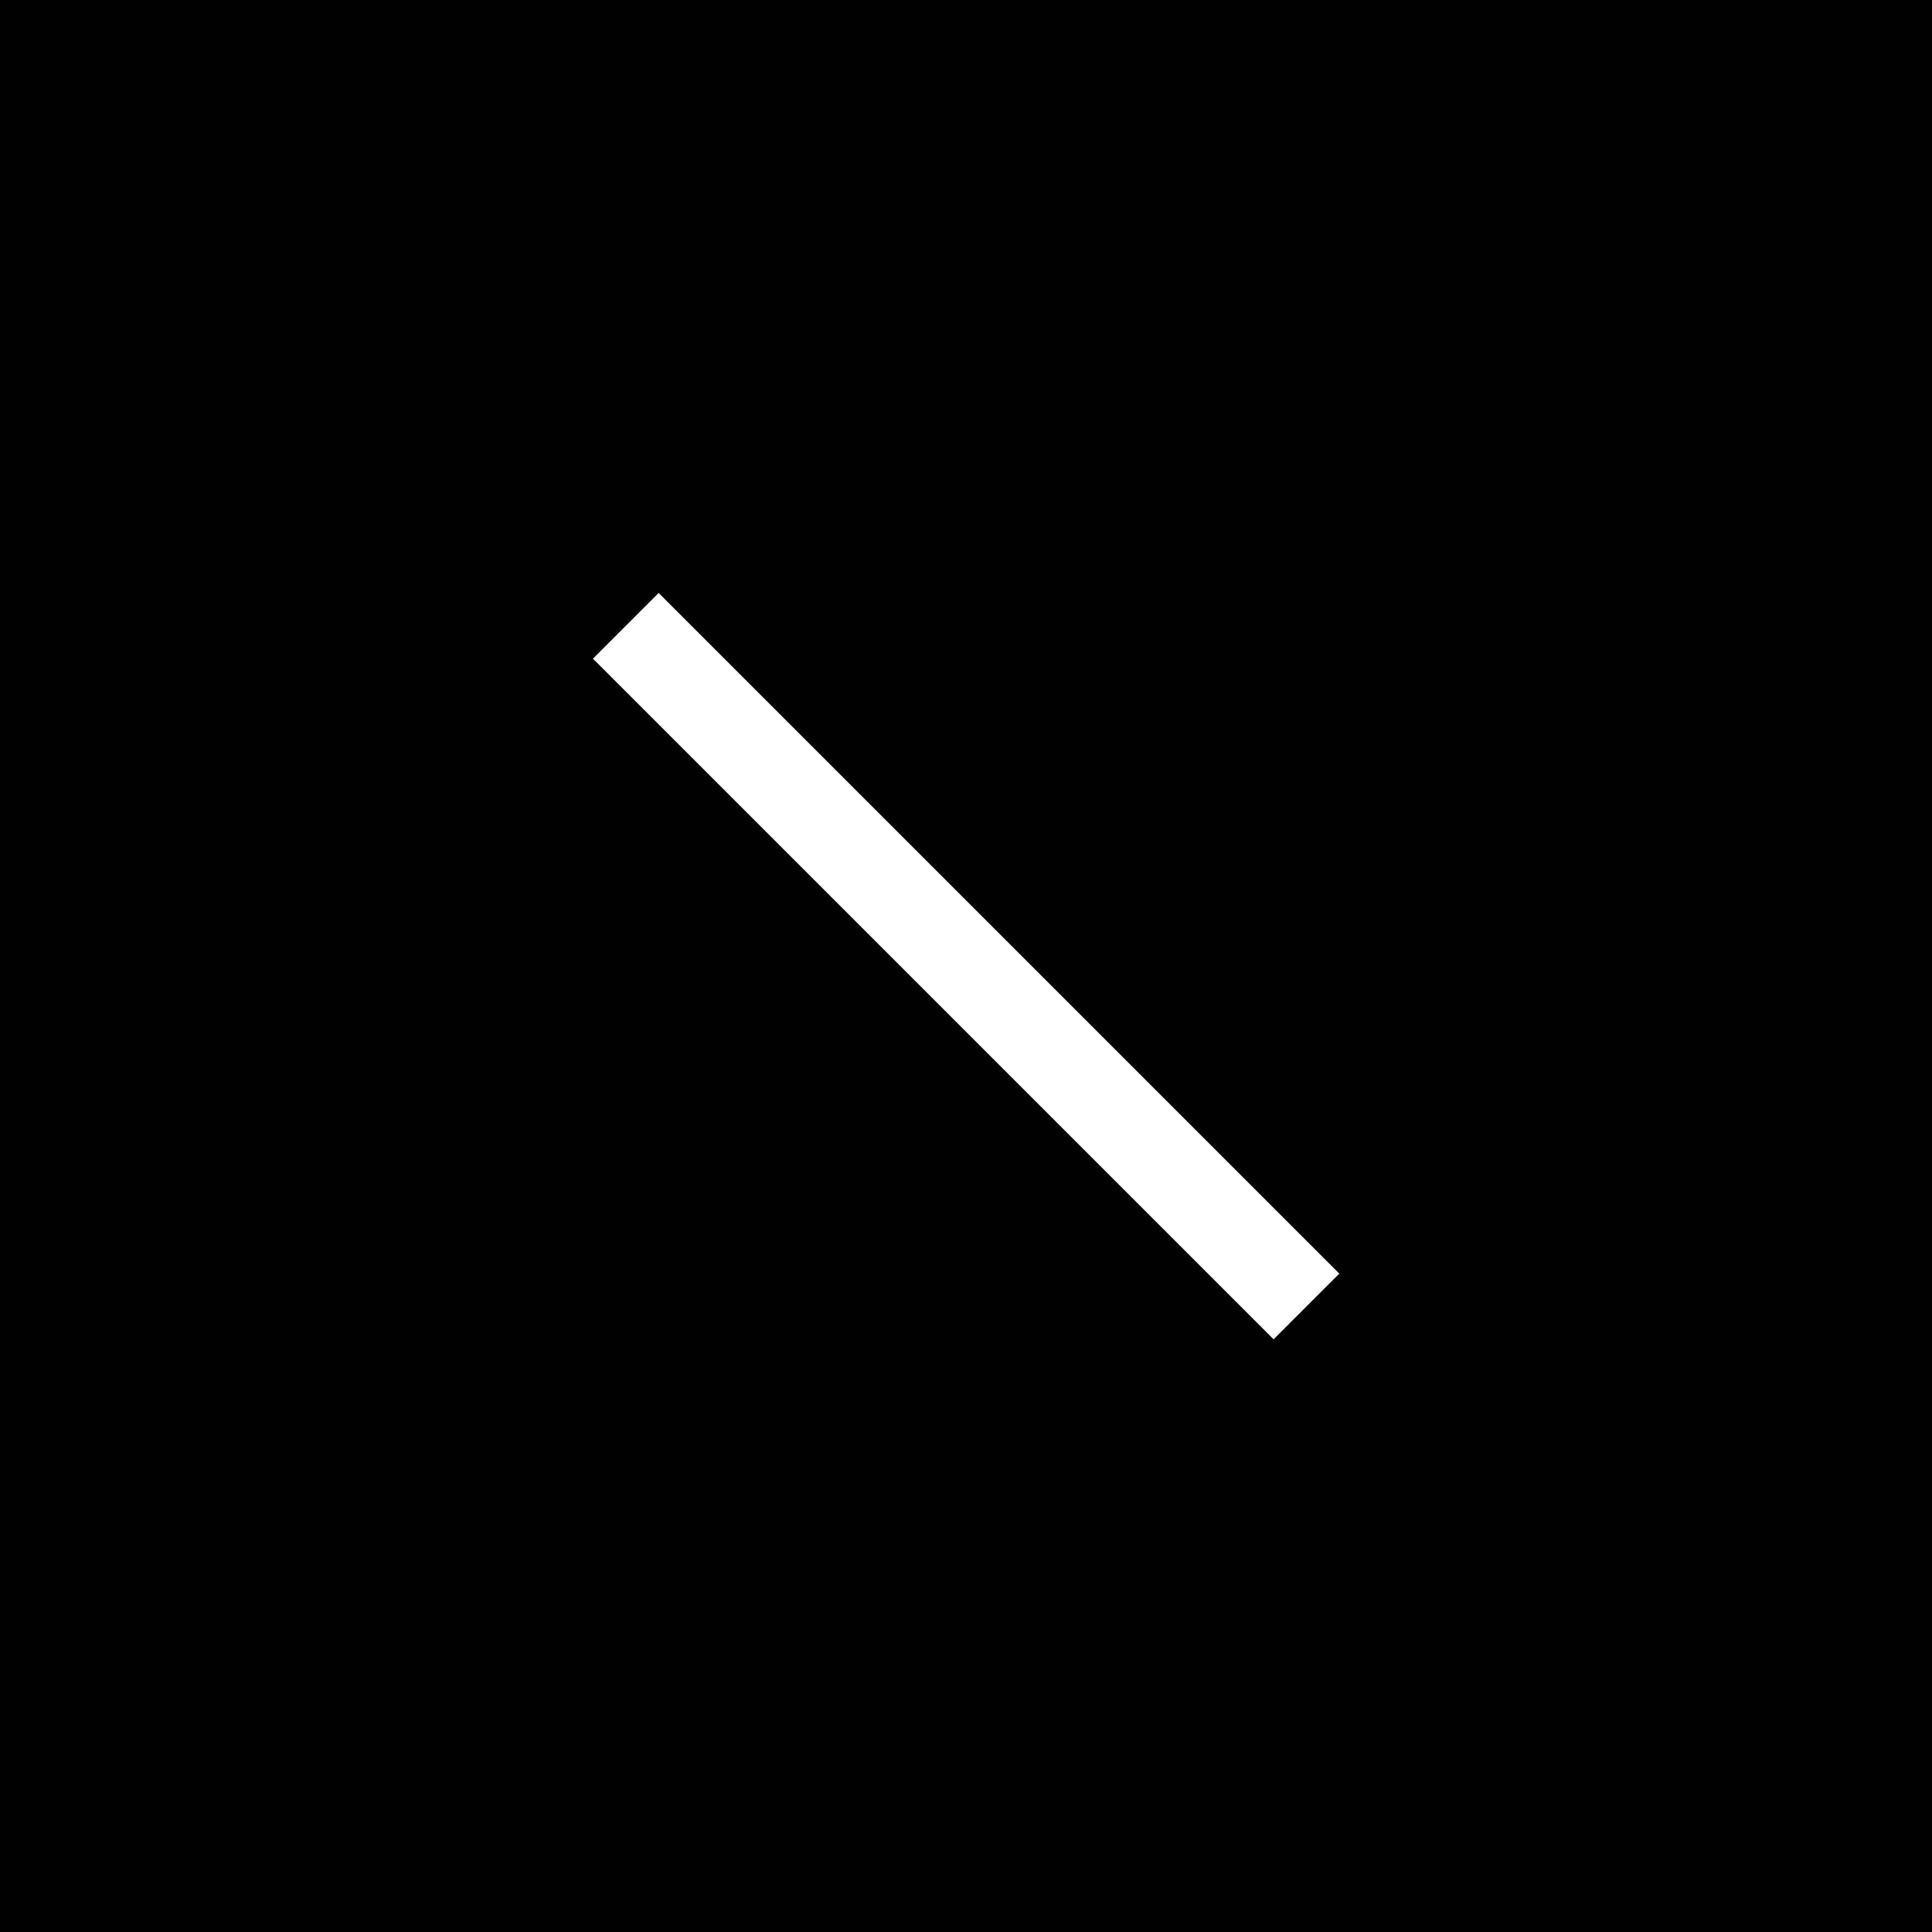

Supplement: Supplementary file 2 [file Hu_Listen_to_the_CVPR_2019_supplemental.pdf › 3386-supp/examples/the modified scheme w.r.t. audio length/fourth lesson/150.jpg]

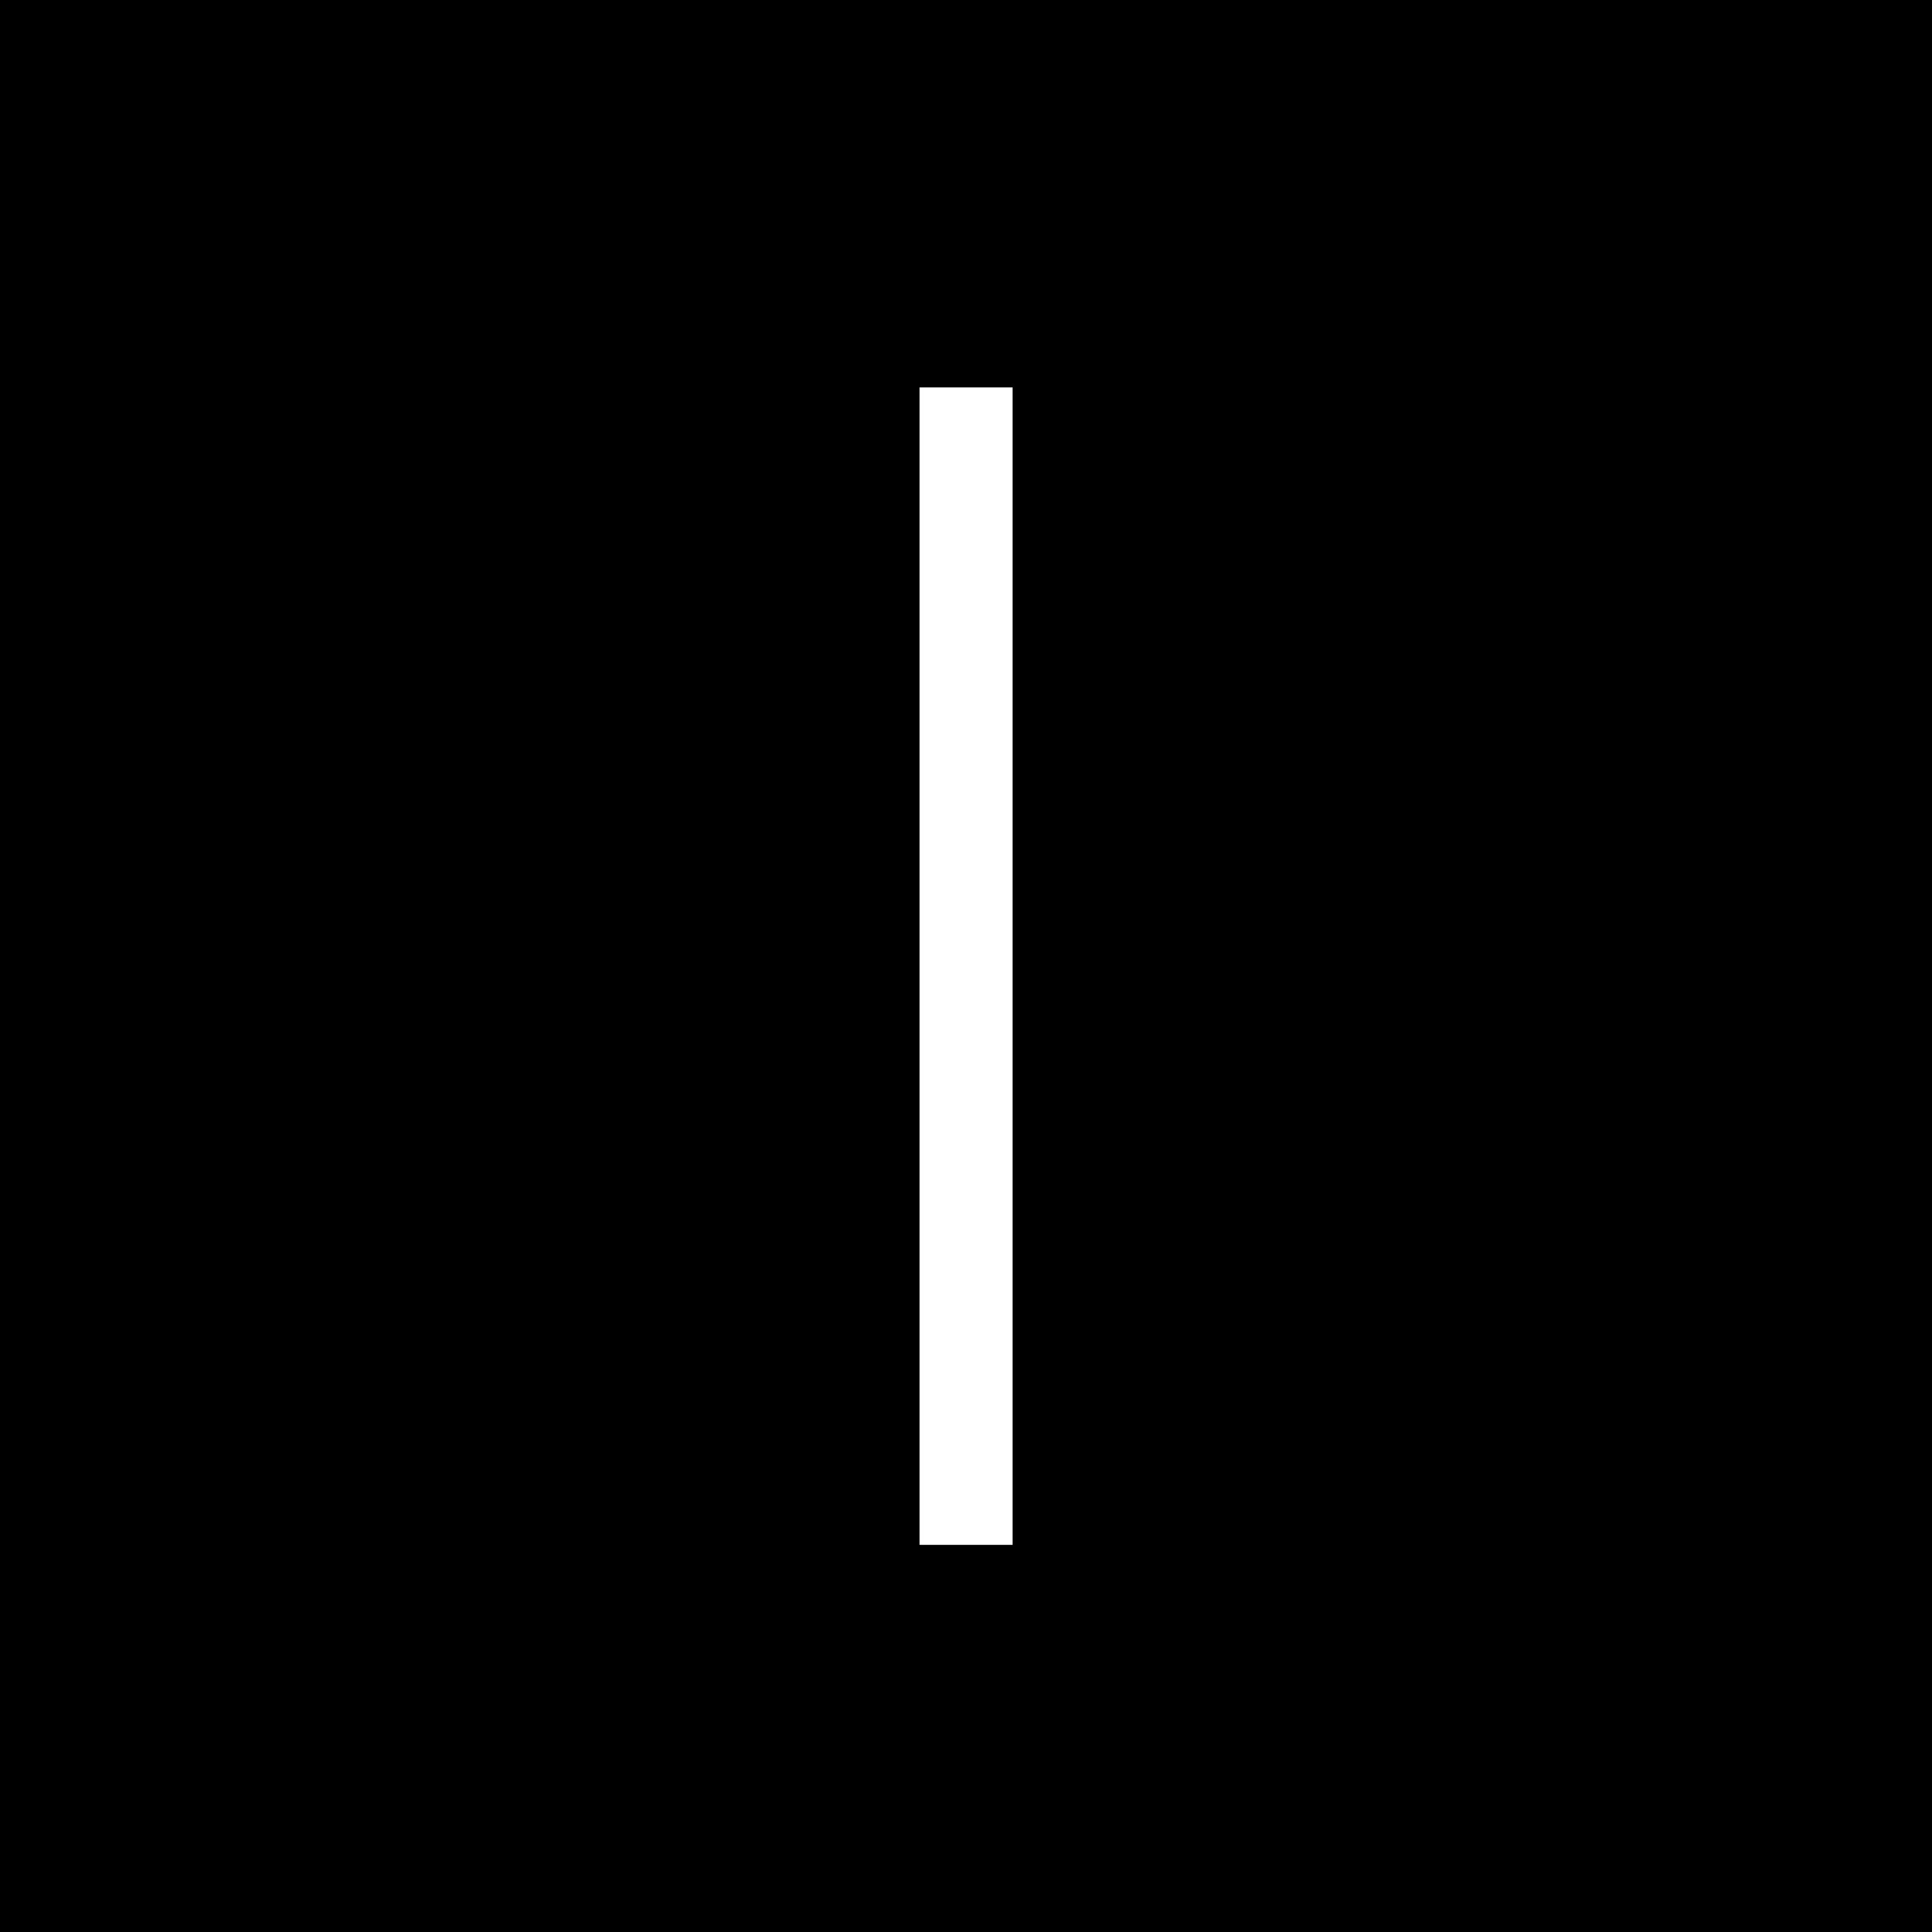

Supplement: Supplementary file 2 [file Hu_Listen_to_the_CVPR_2019_supplemental.pdf › 3386-supp/examples/the modified scheme w.r.t. audio length/fourth lesson/180.jpg]

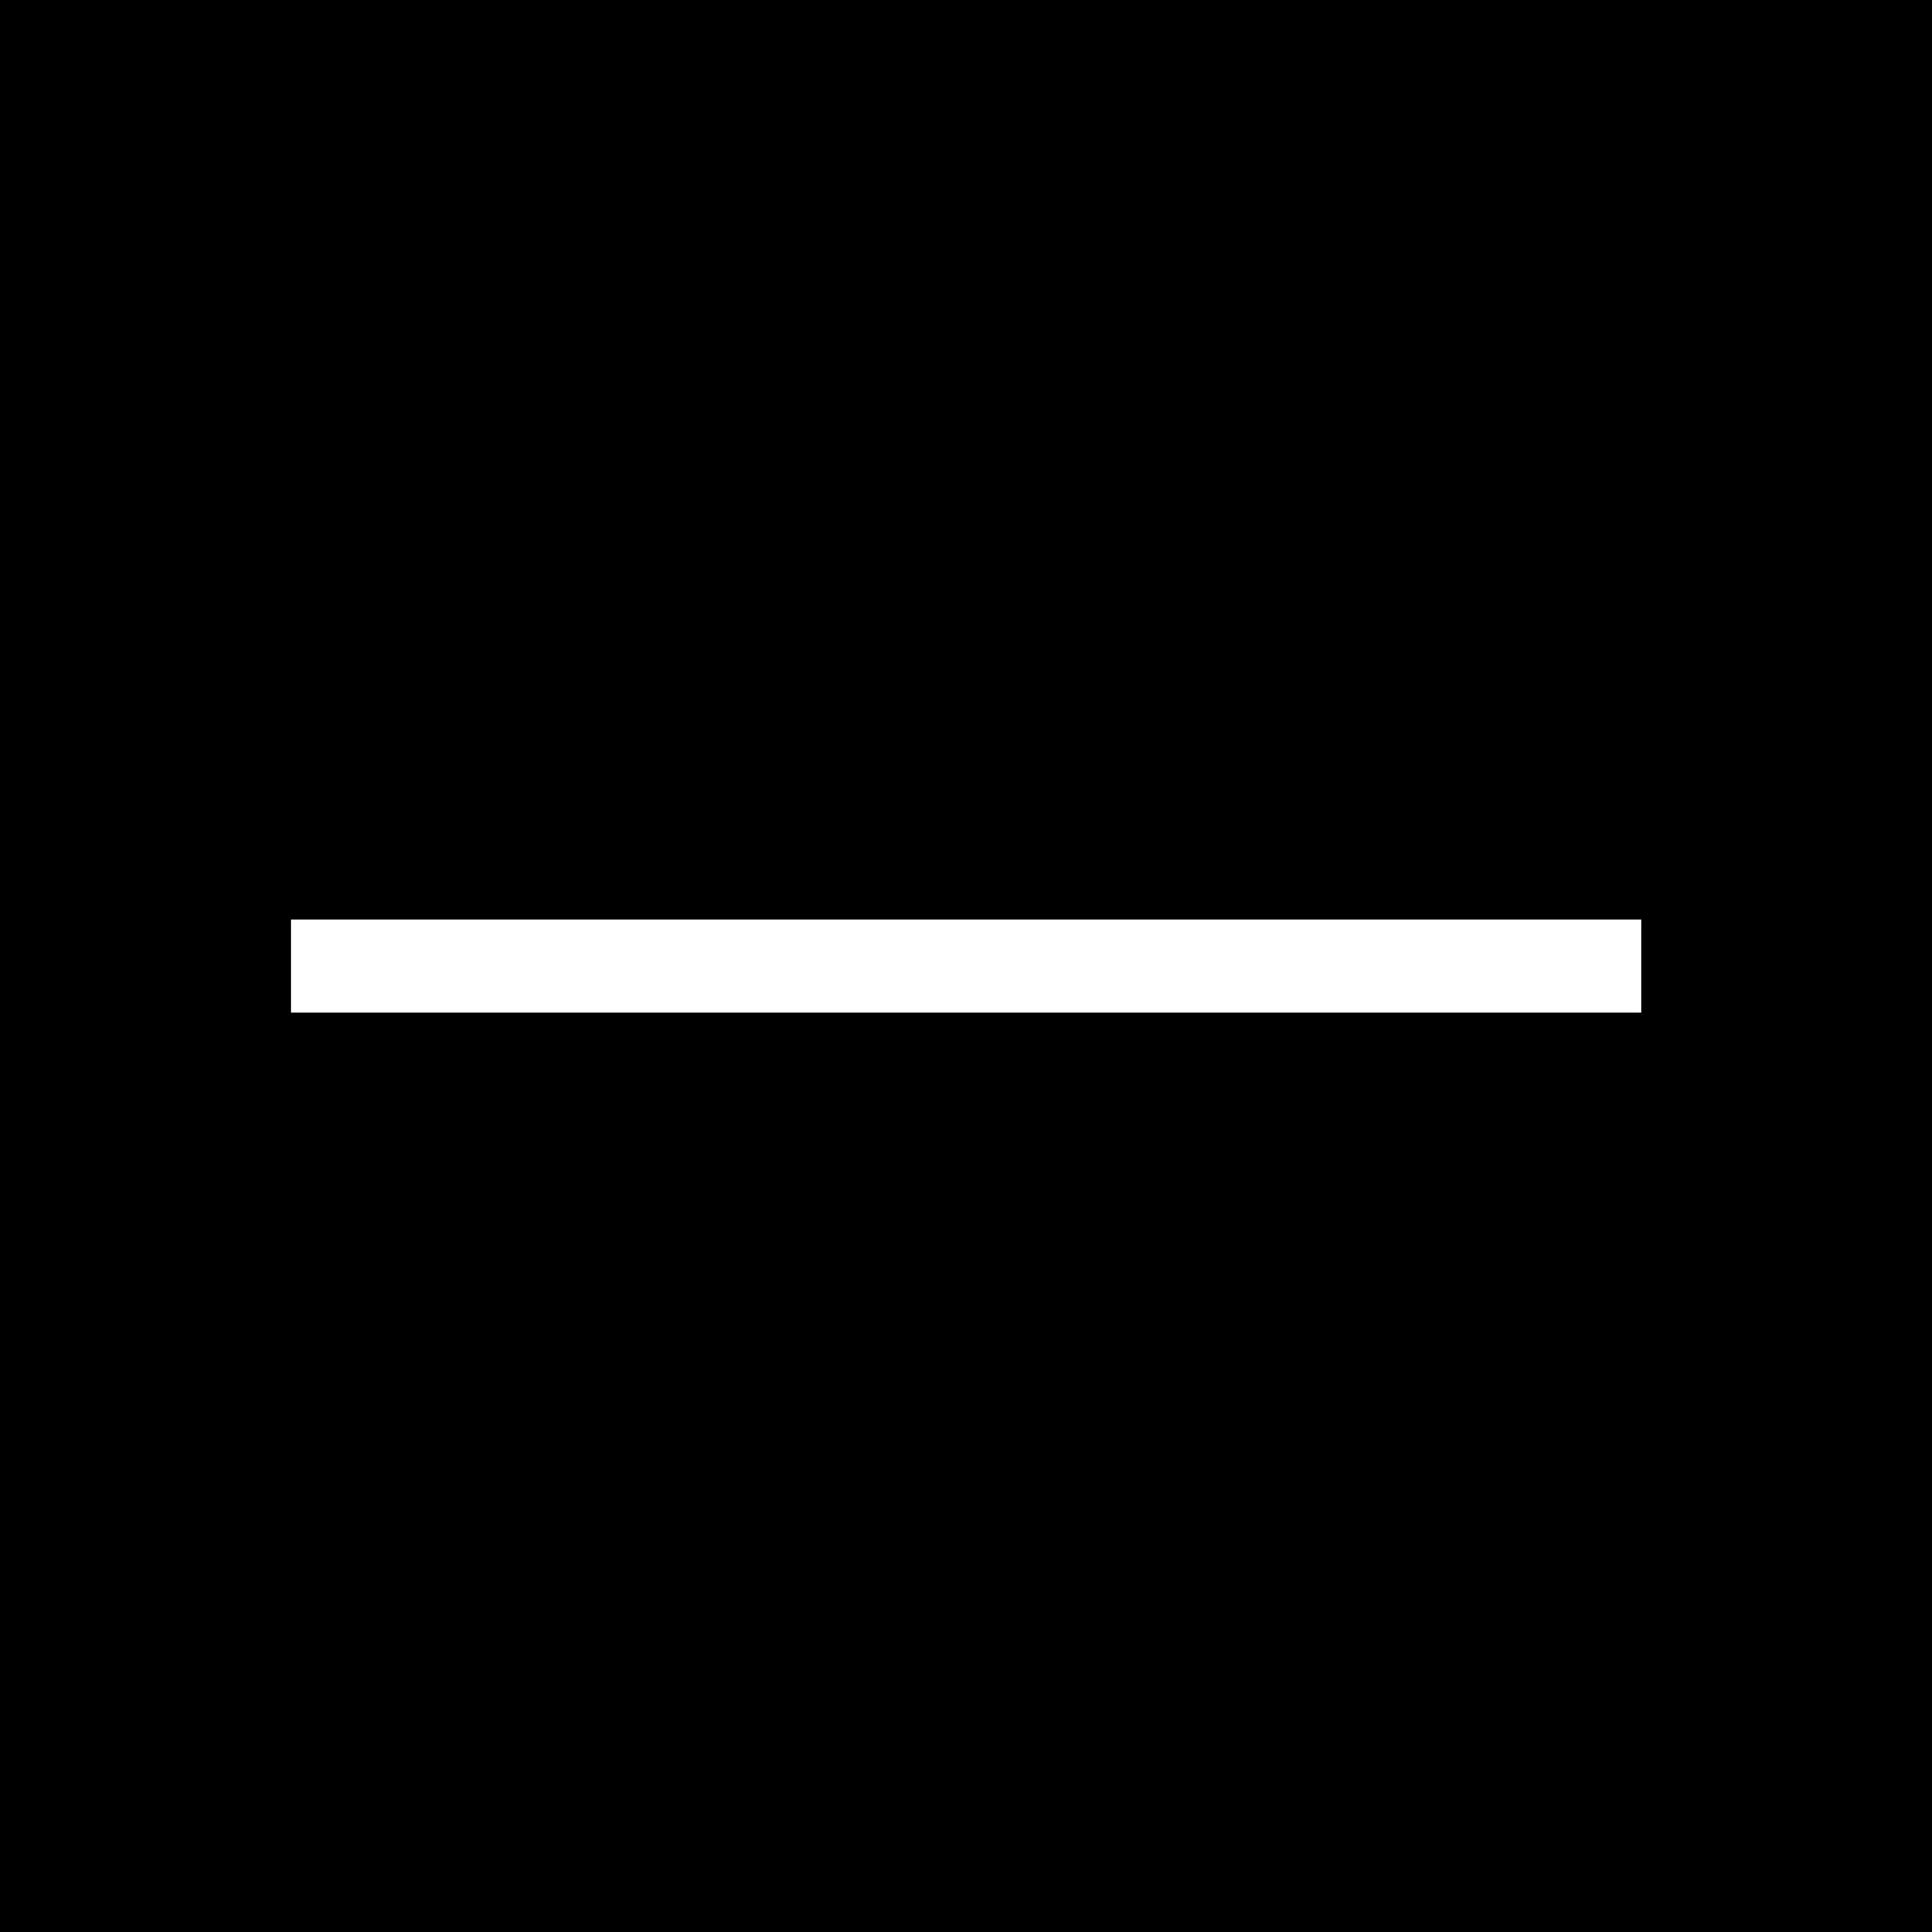

Supplement: Supplementary file 2 [file Hu_Listen_to_the_CVPR_2019_supplemental.pdf › 3386-supp/examples/the modified scheme w.r.t. audio length/fourth lesson/210.jpg]

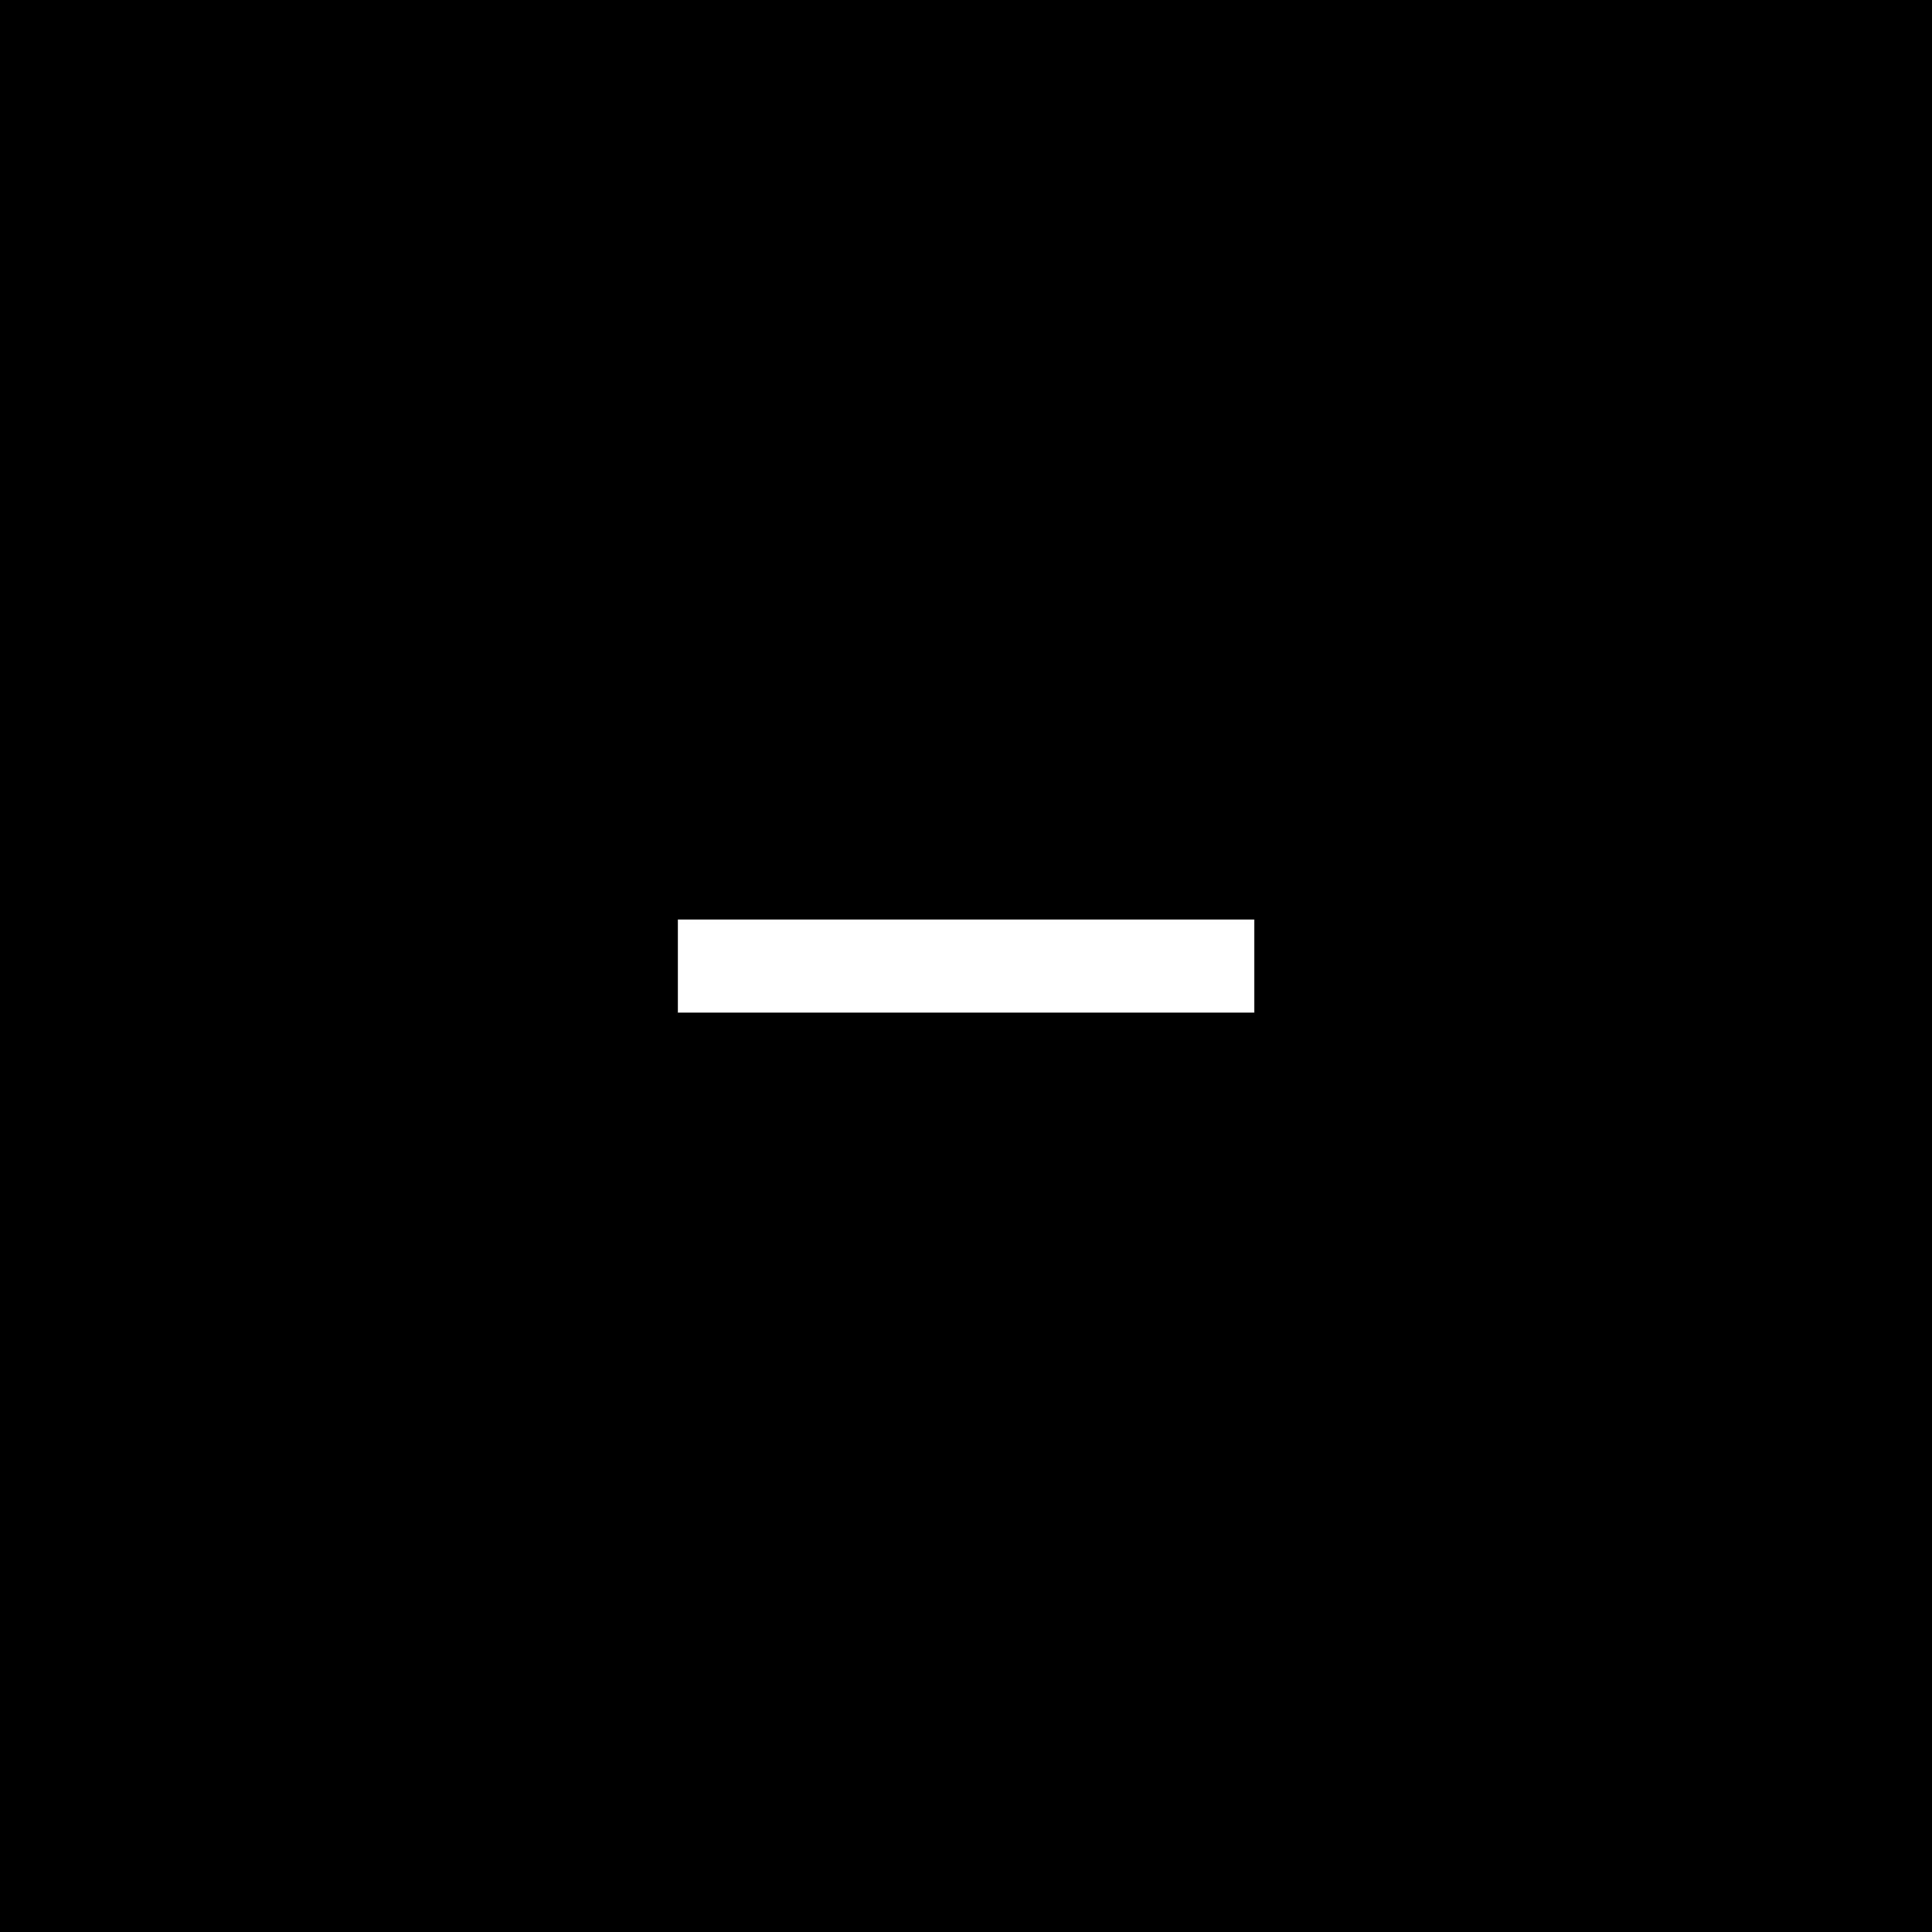

Supplement: Supplementary file 2 [file Hu_Listen_to_the_CVPR_2019_supplemental.pdf › 3386-supp/examples/the modified scheme w.r.t. audio length/fourth lesson/90.jpg]

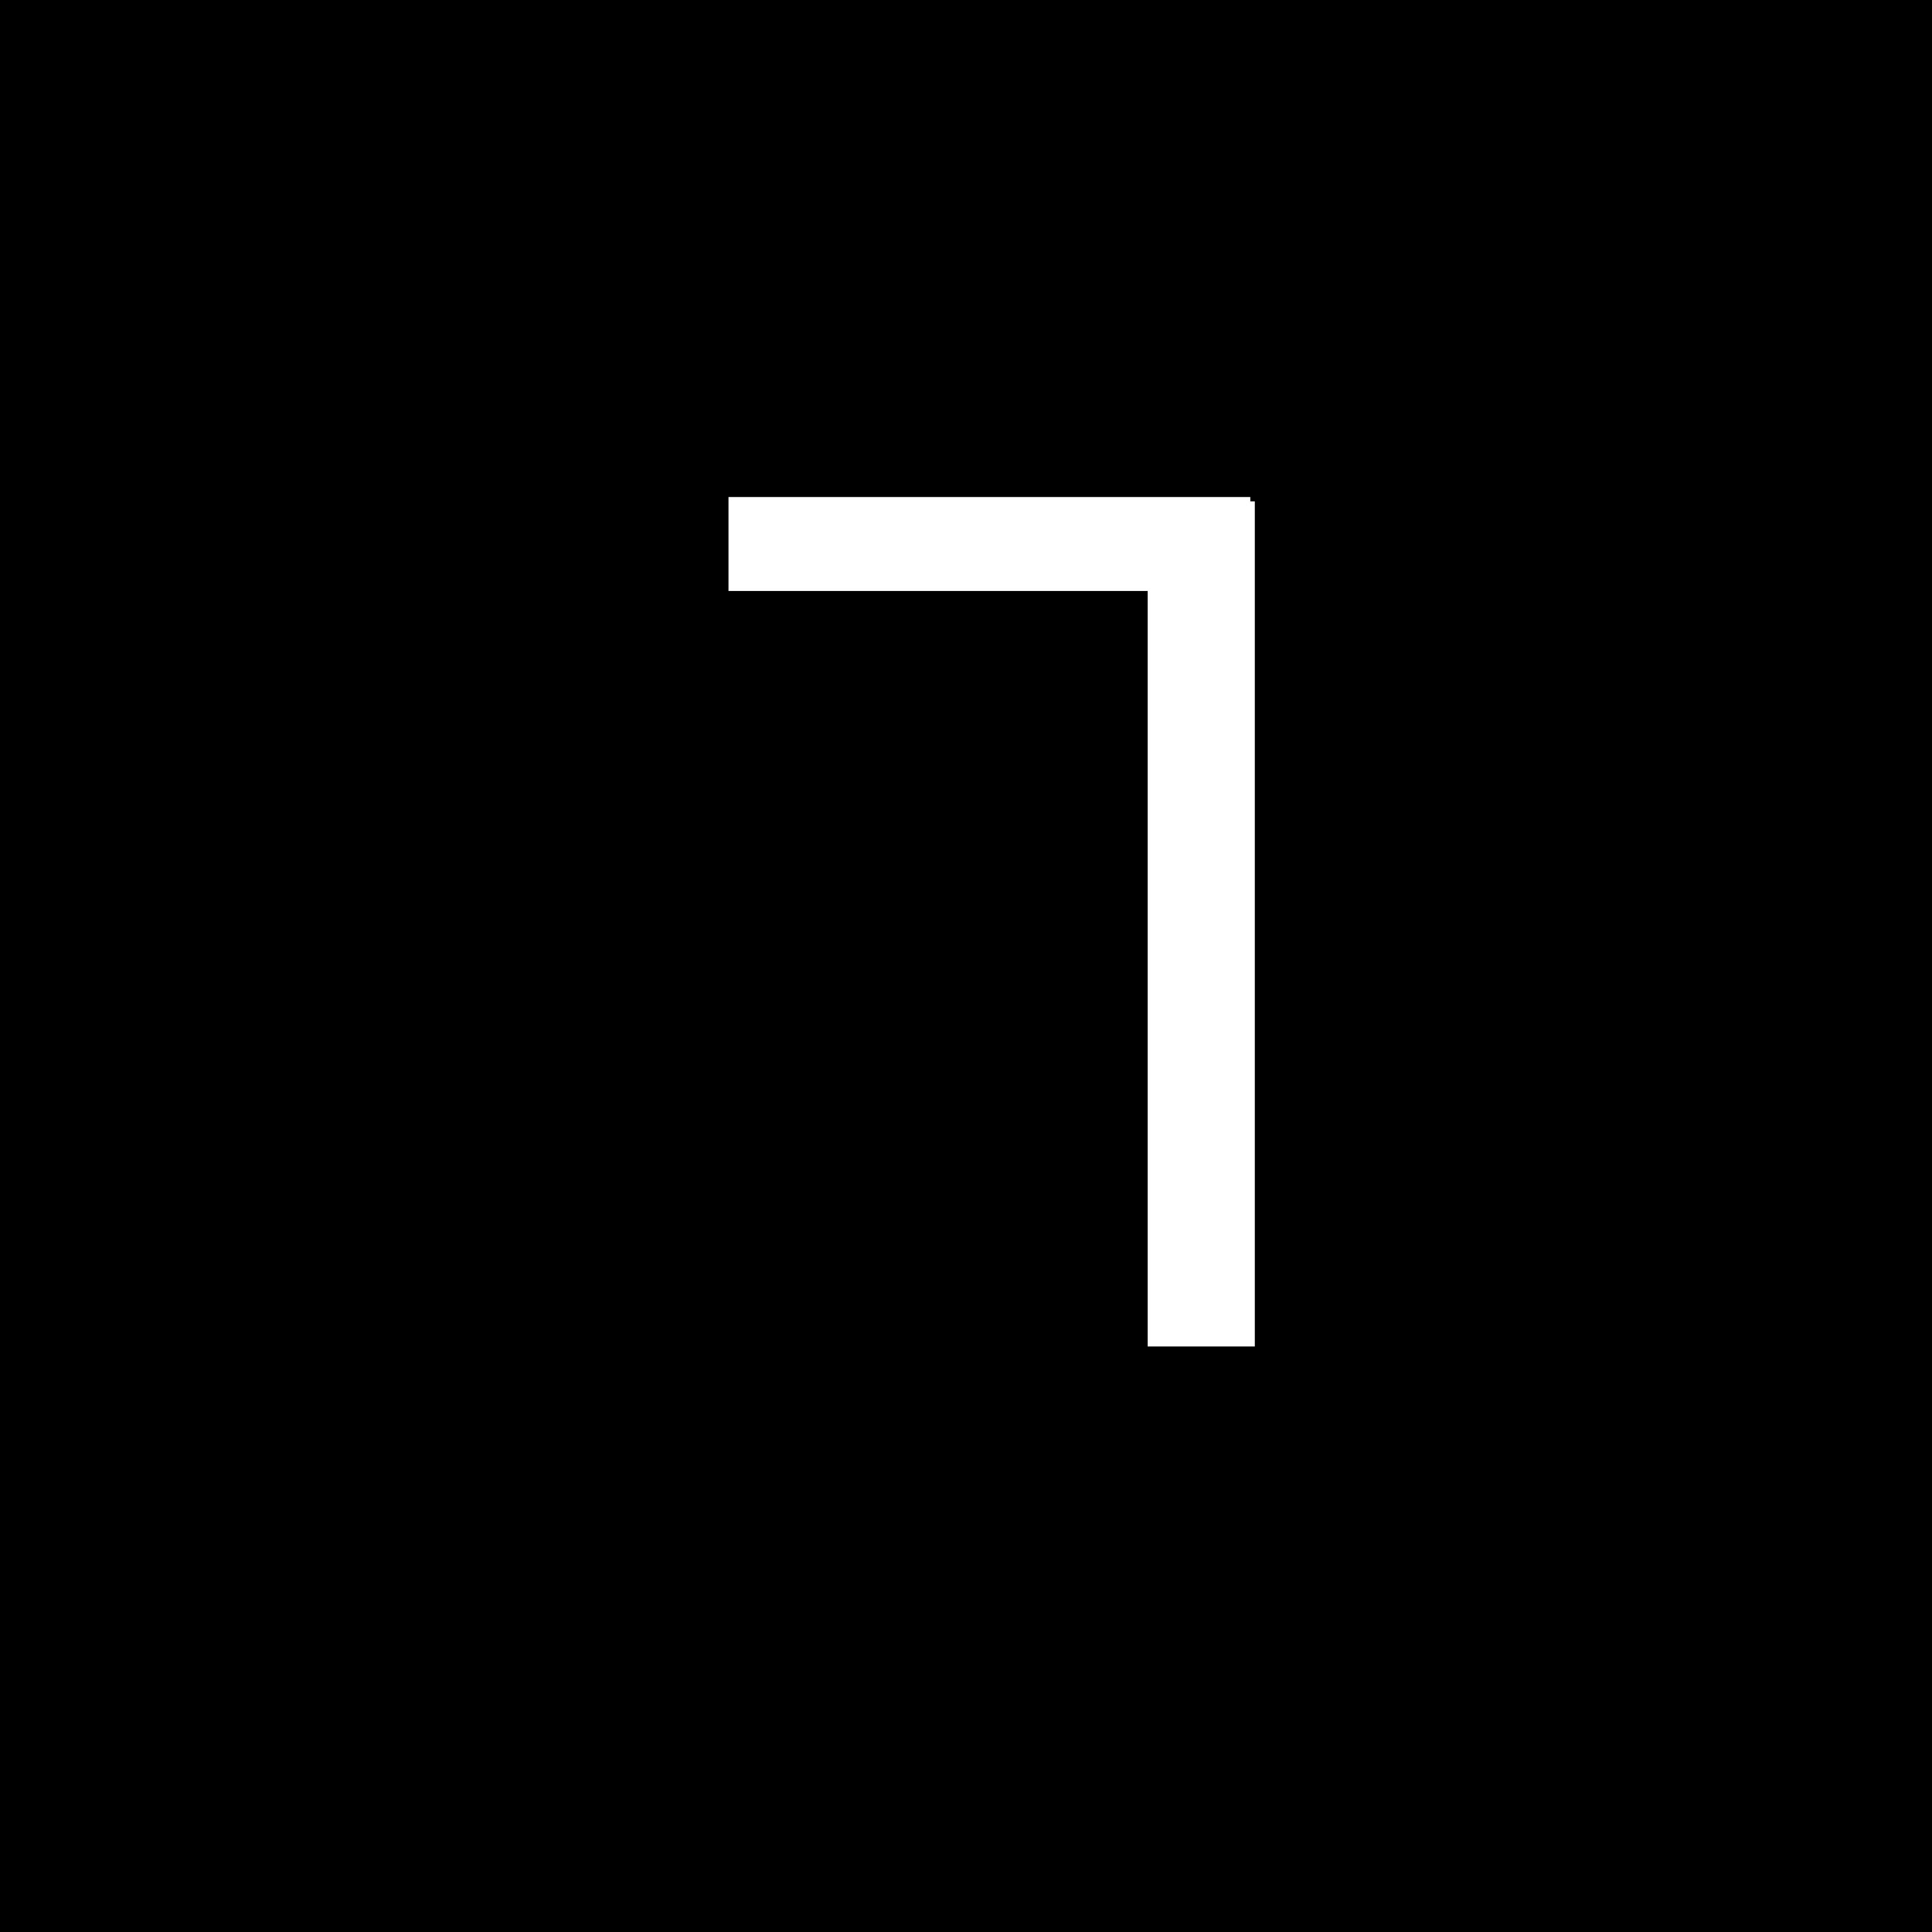

Supplement: Supplementary file 2 [file Hu_Listen_to_the_CVPR_2019_supplemental.pdf › 3386-supp/examples/the modified scheme w.r.t. audio length/second lesson/1.jpg]

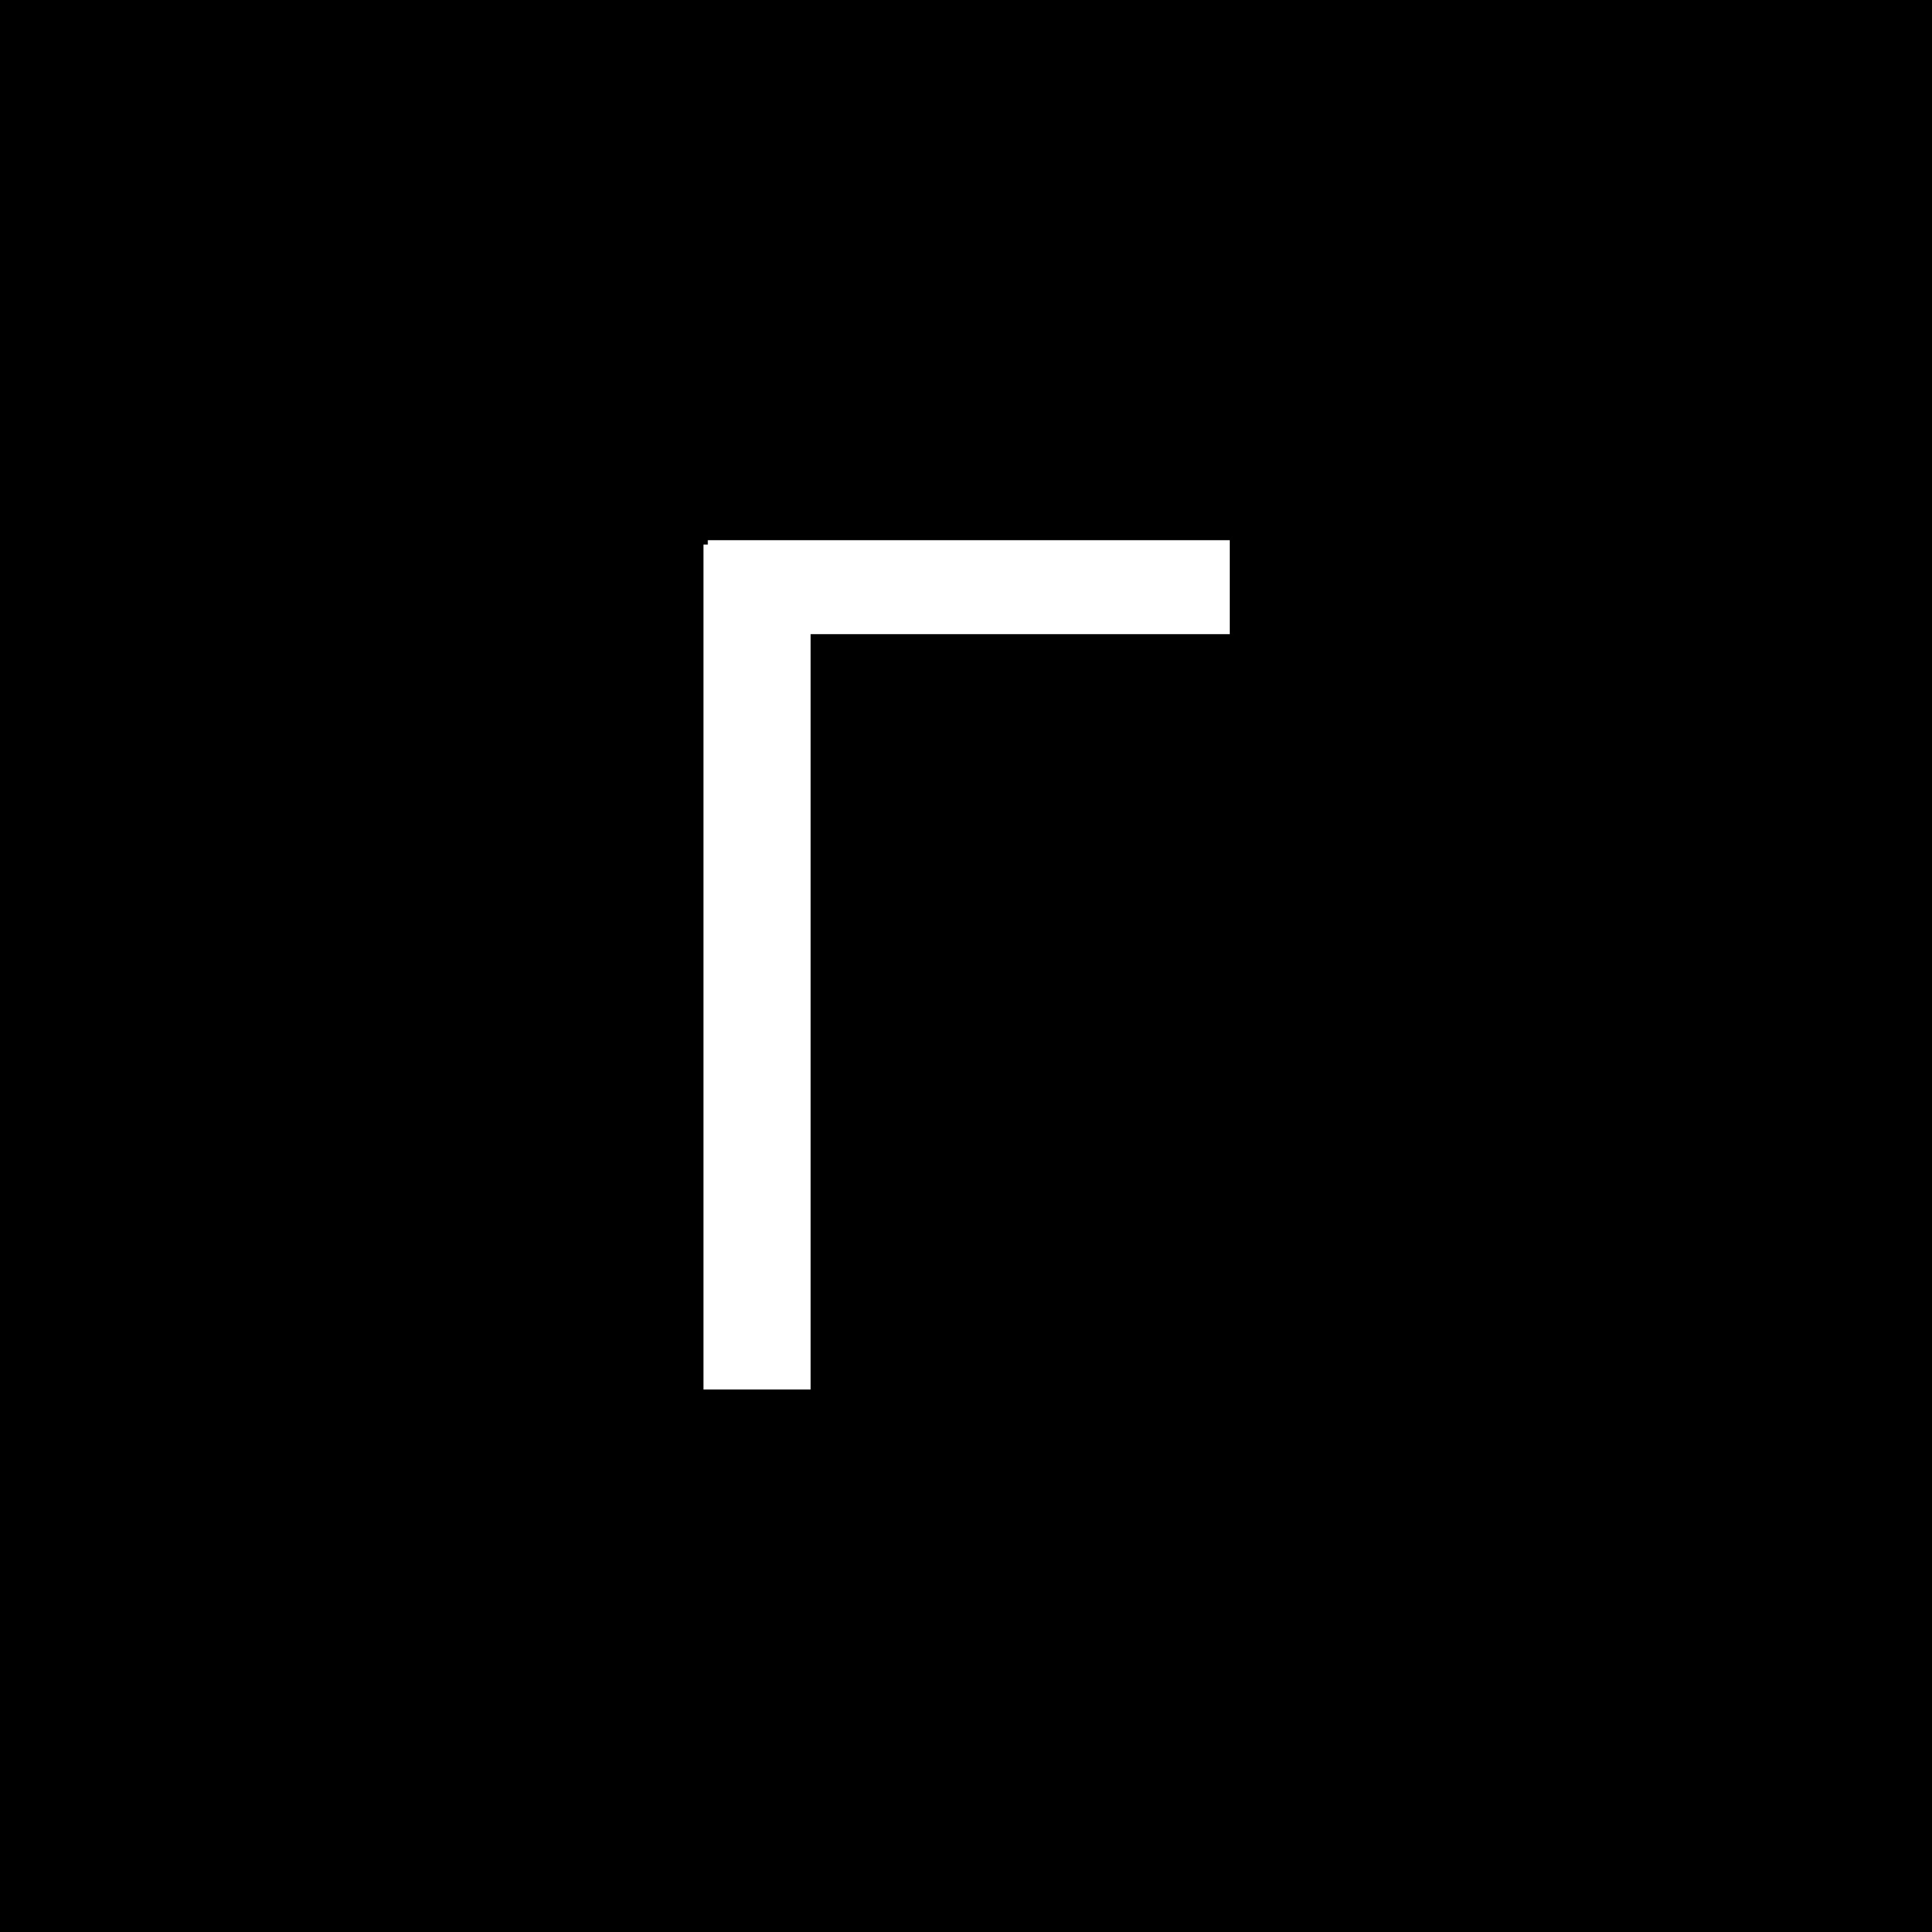

Supplement: Supplementary file 2 [file Hu_Listen_to_the_CVPR_2019_supplemental.pdf › 3386-supp/examples/the modified scheme w.r.t. audio length/second lesson/2.jpg]

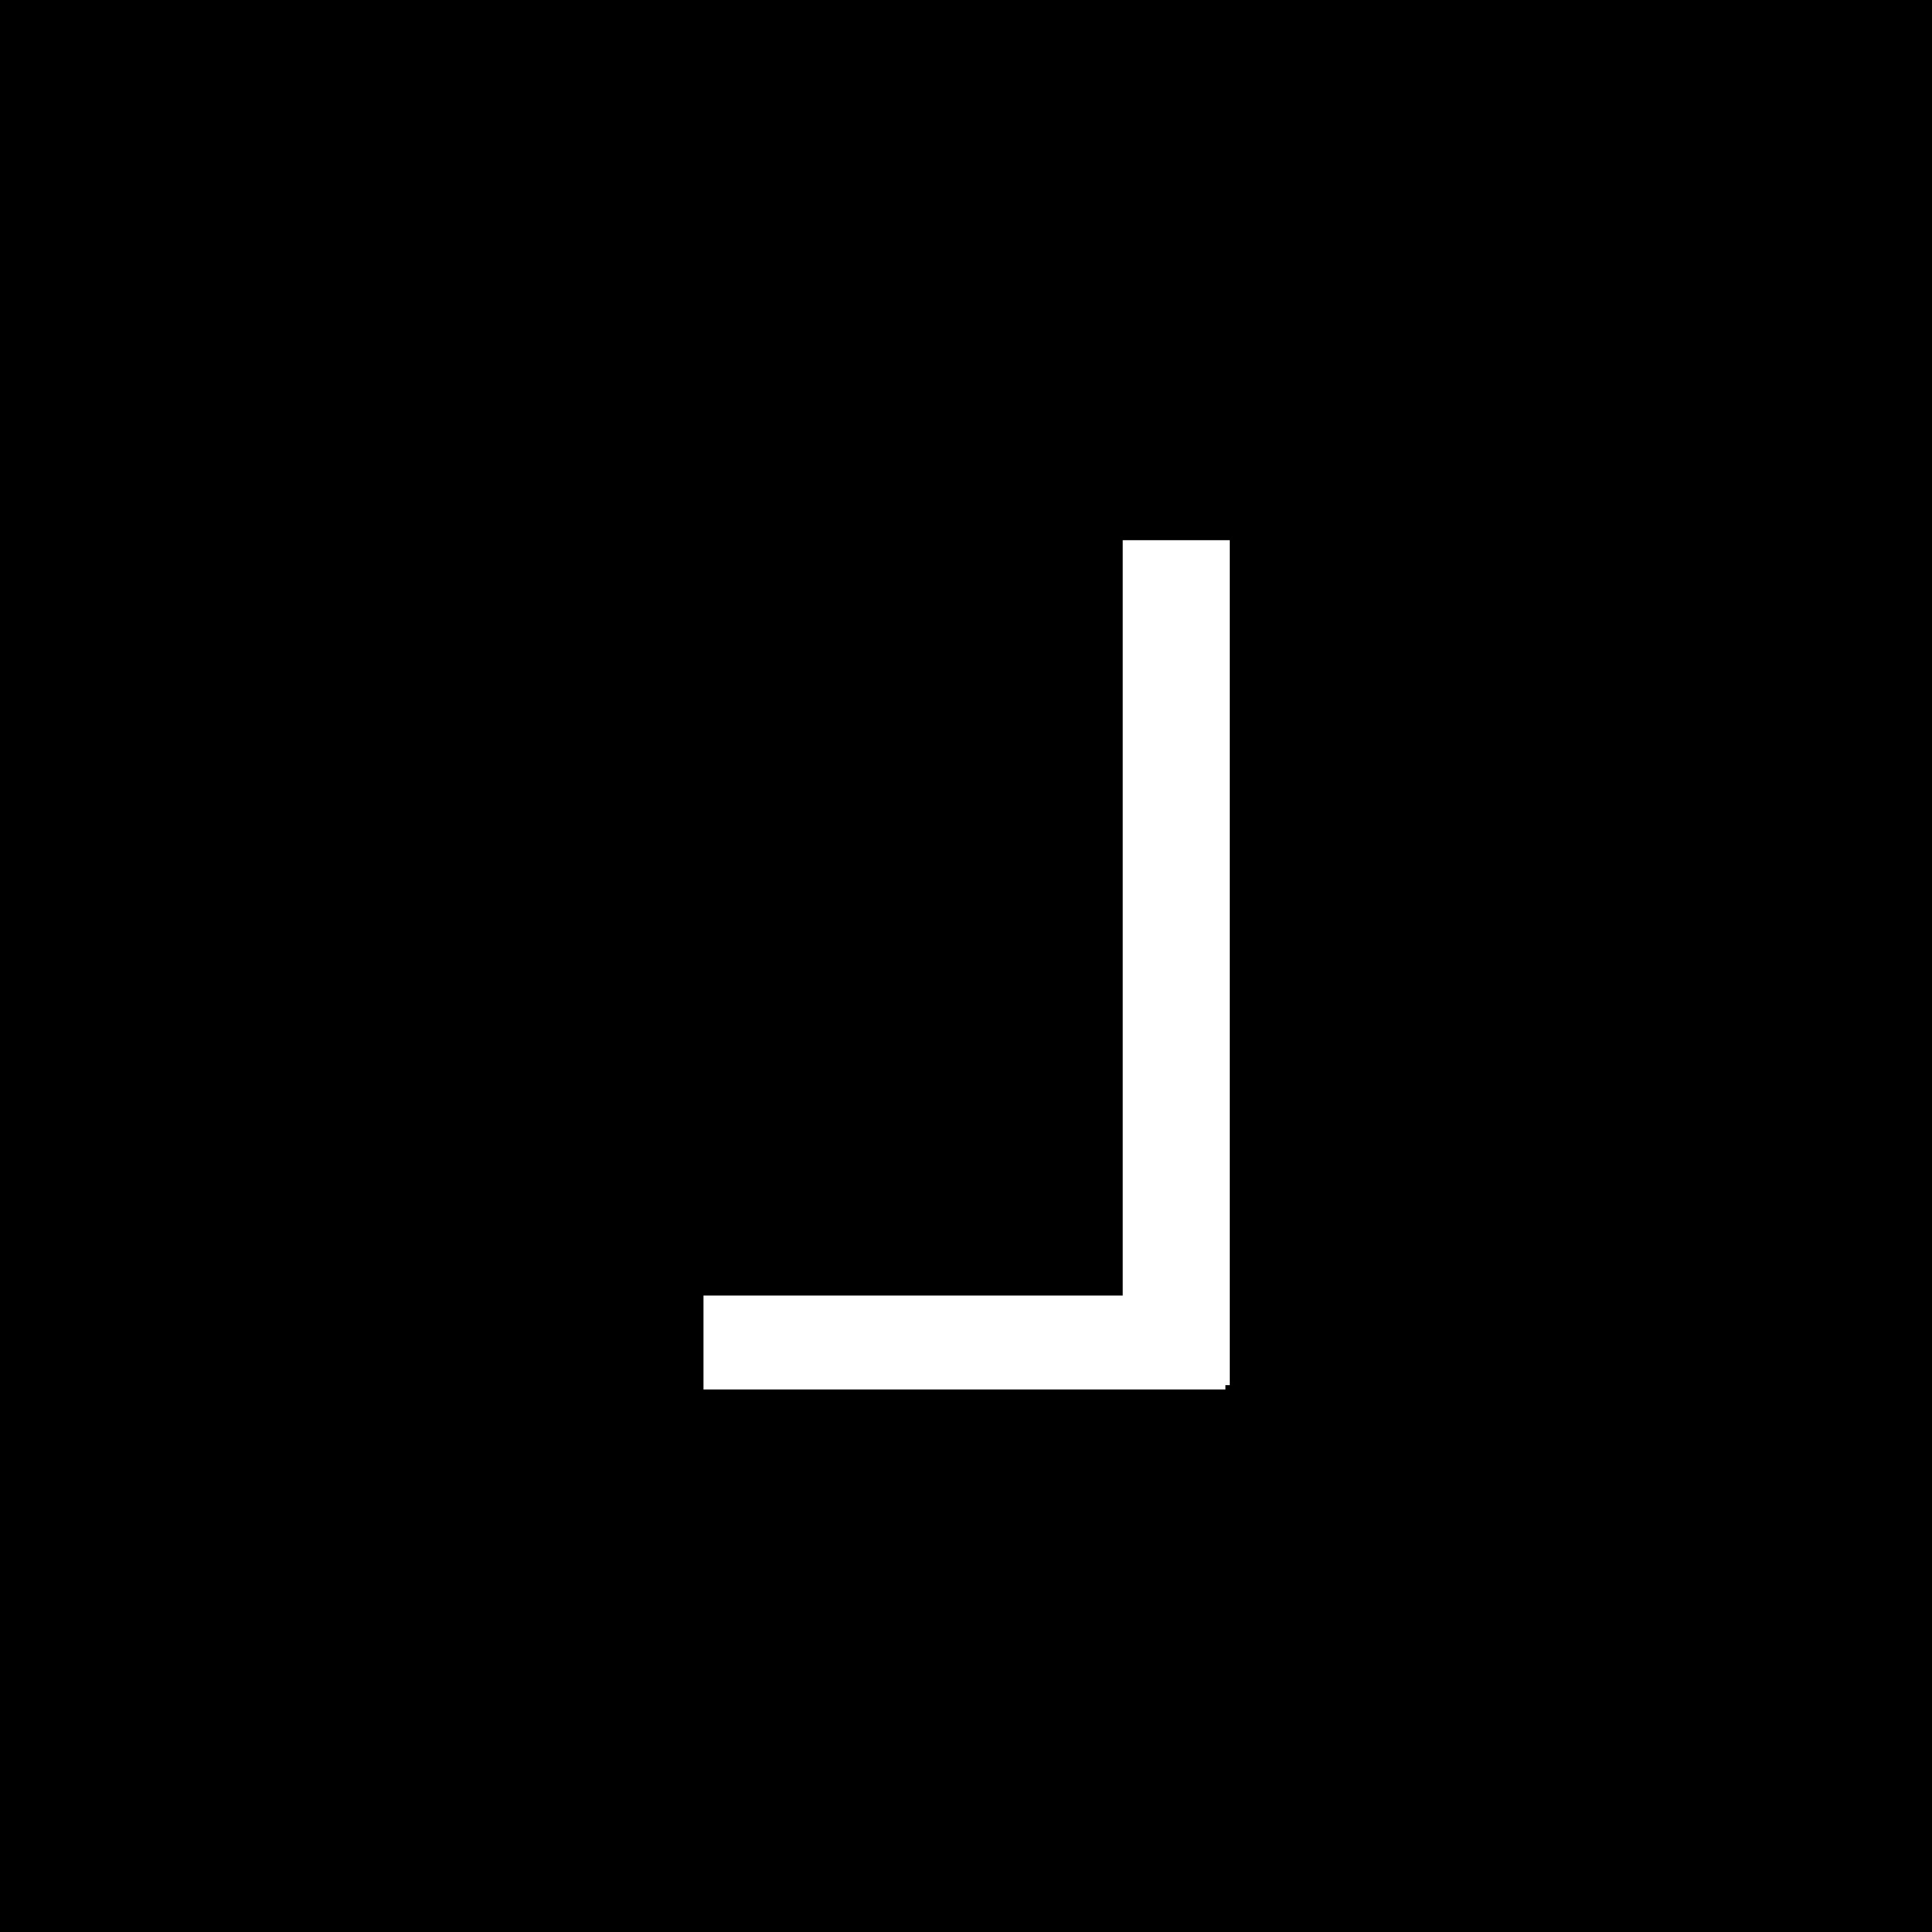

Supplement: Supplementary file 2 [file Hu_Listen_to_the_CVPR_2019_supplemental.pdf › 3386-supp/examples/the modified scheme w.r.t. audio length/second lesson/3.jpg]

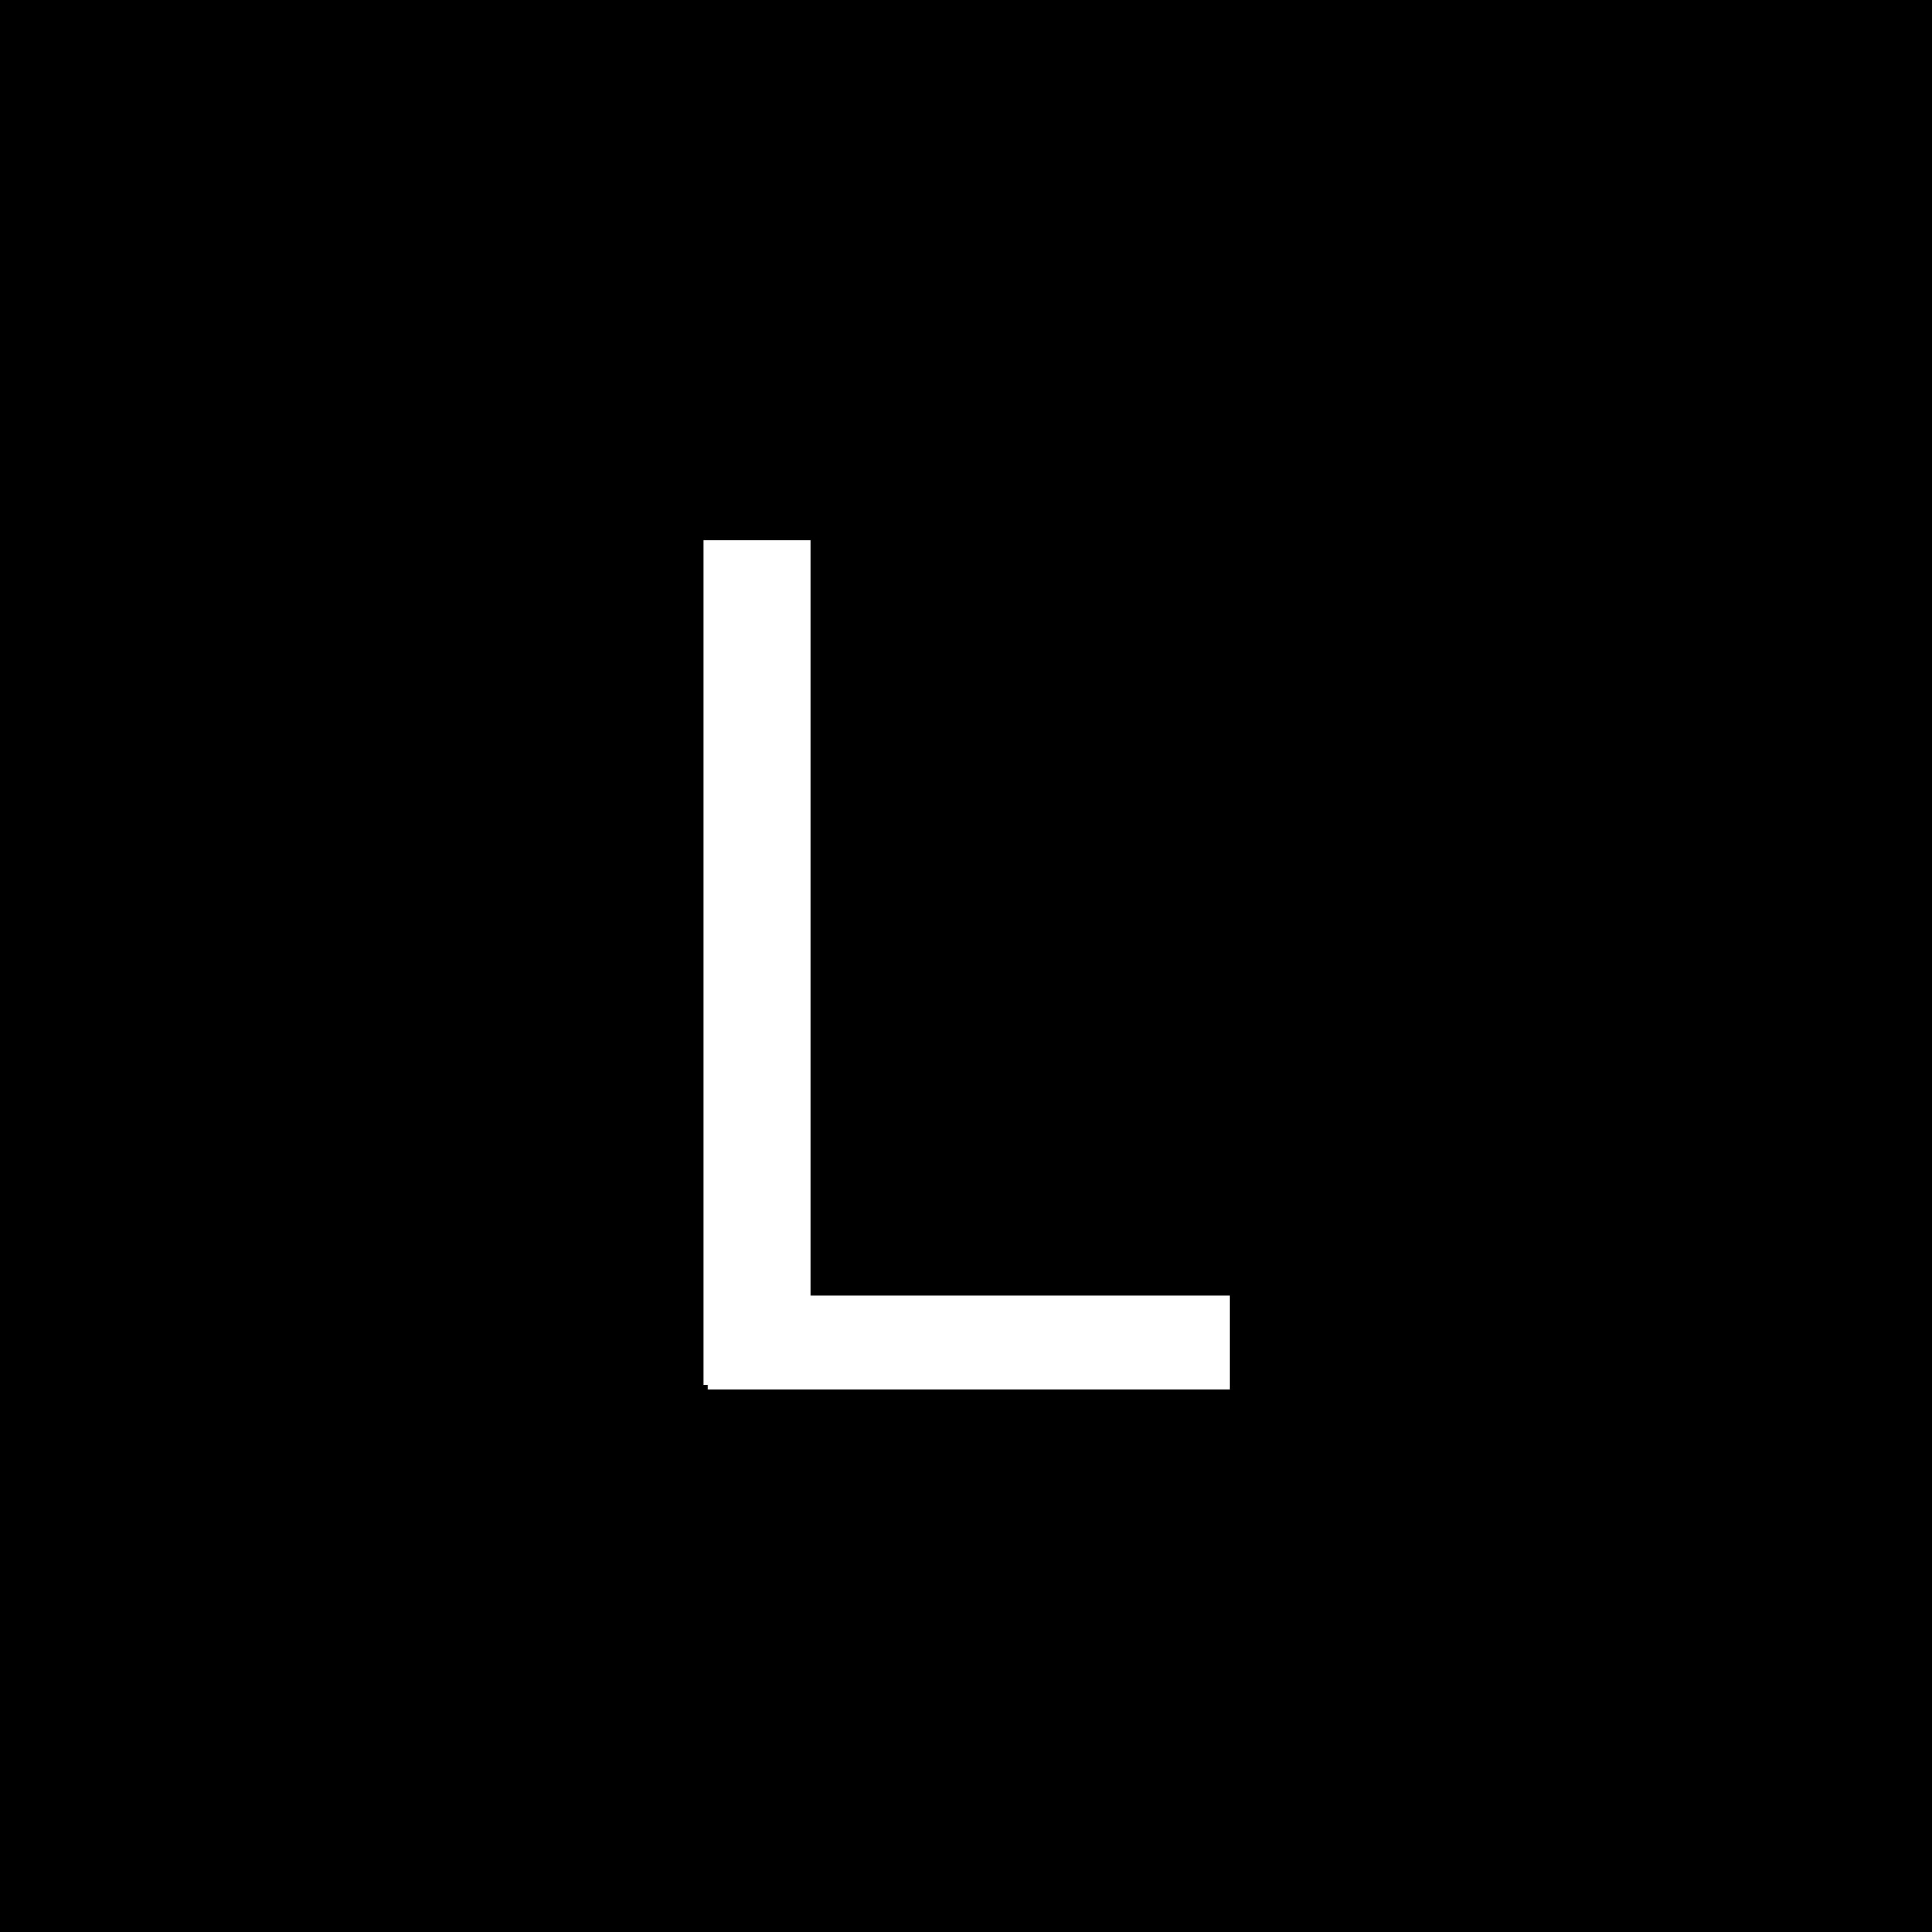

Supplement: Supplementary file 2 [file Hu_Listen_to_the_CVPR_2019_supplemental.pdf › 3386-supp/examples/the modified scheme w.r.t. audio length/second lesson/4.jpg]

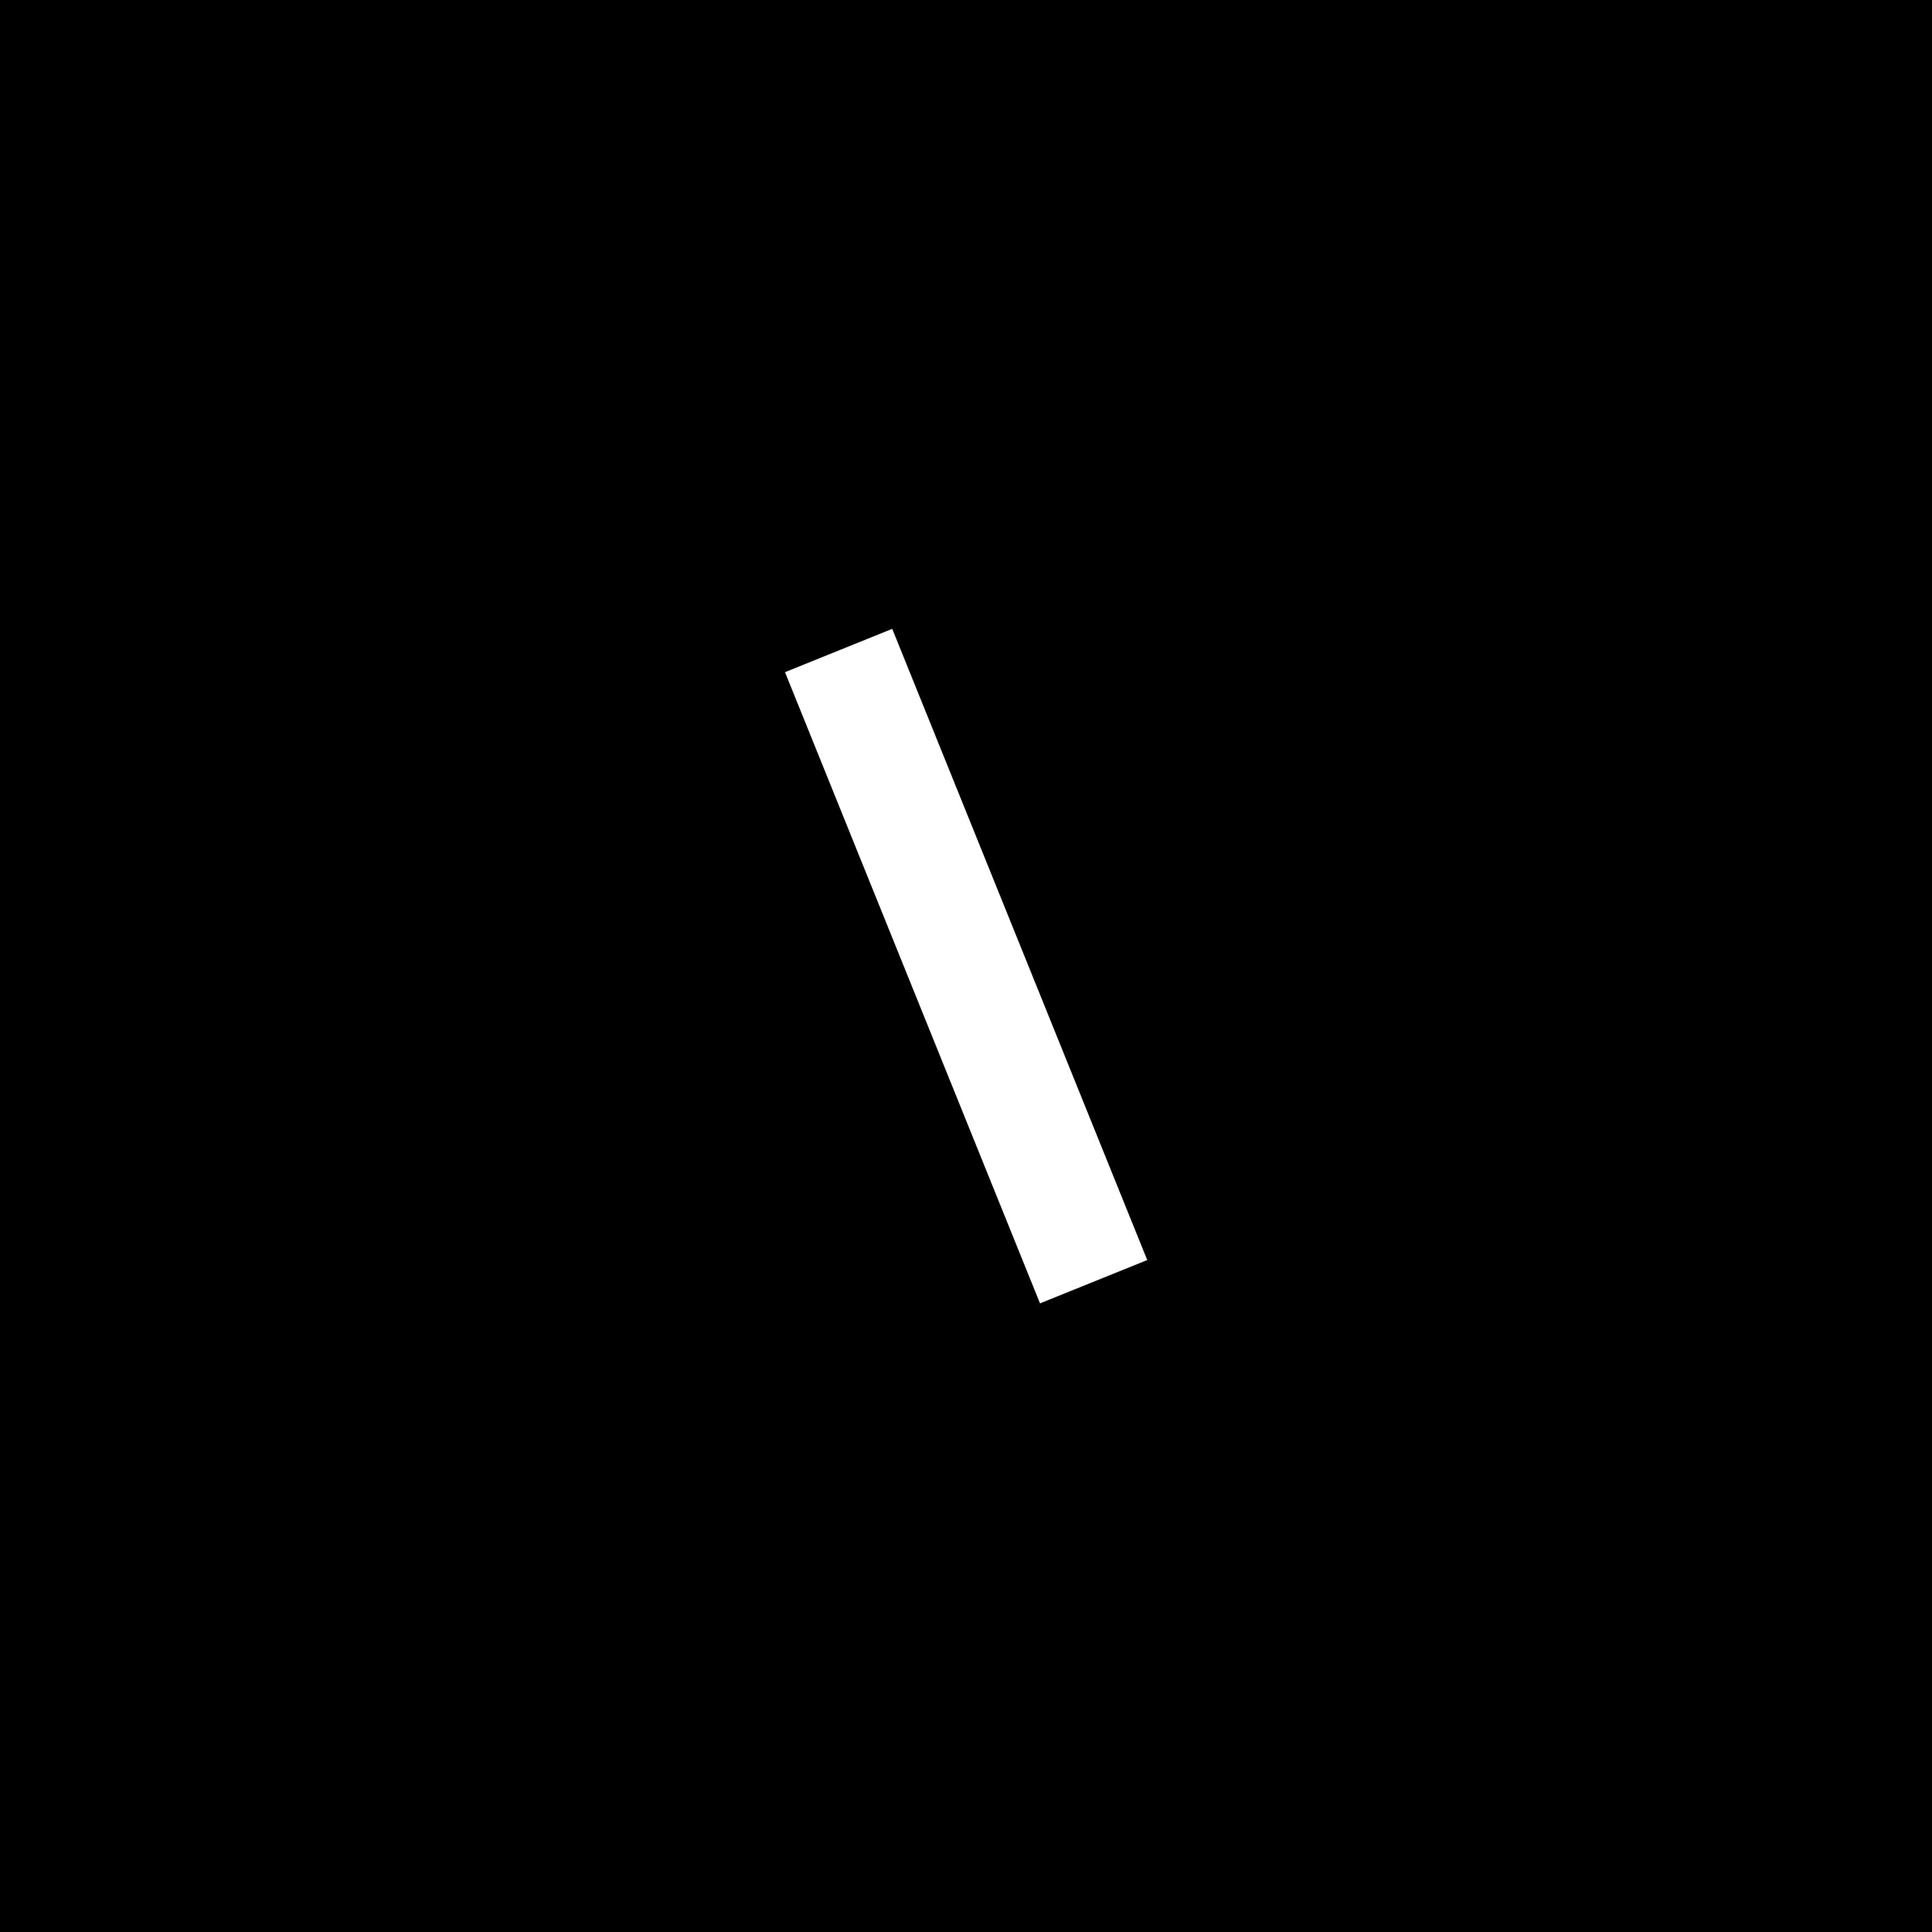

Supplement: Supplementary file 2 [file Hu_Listen_to_the_CVPR_2019_supplemental.pdf › 3386-supp/examples/the modified scheme w.r.t. audio length/third lesson/-22.jpg]

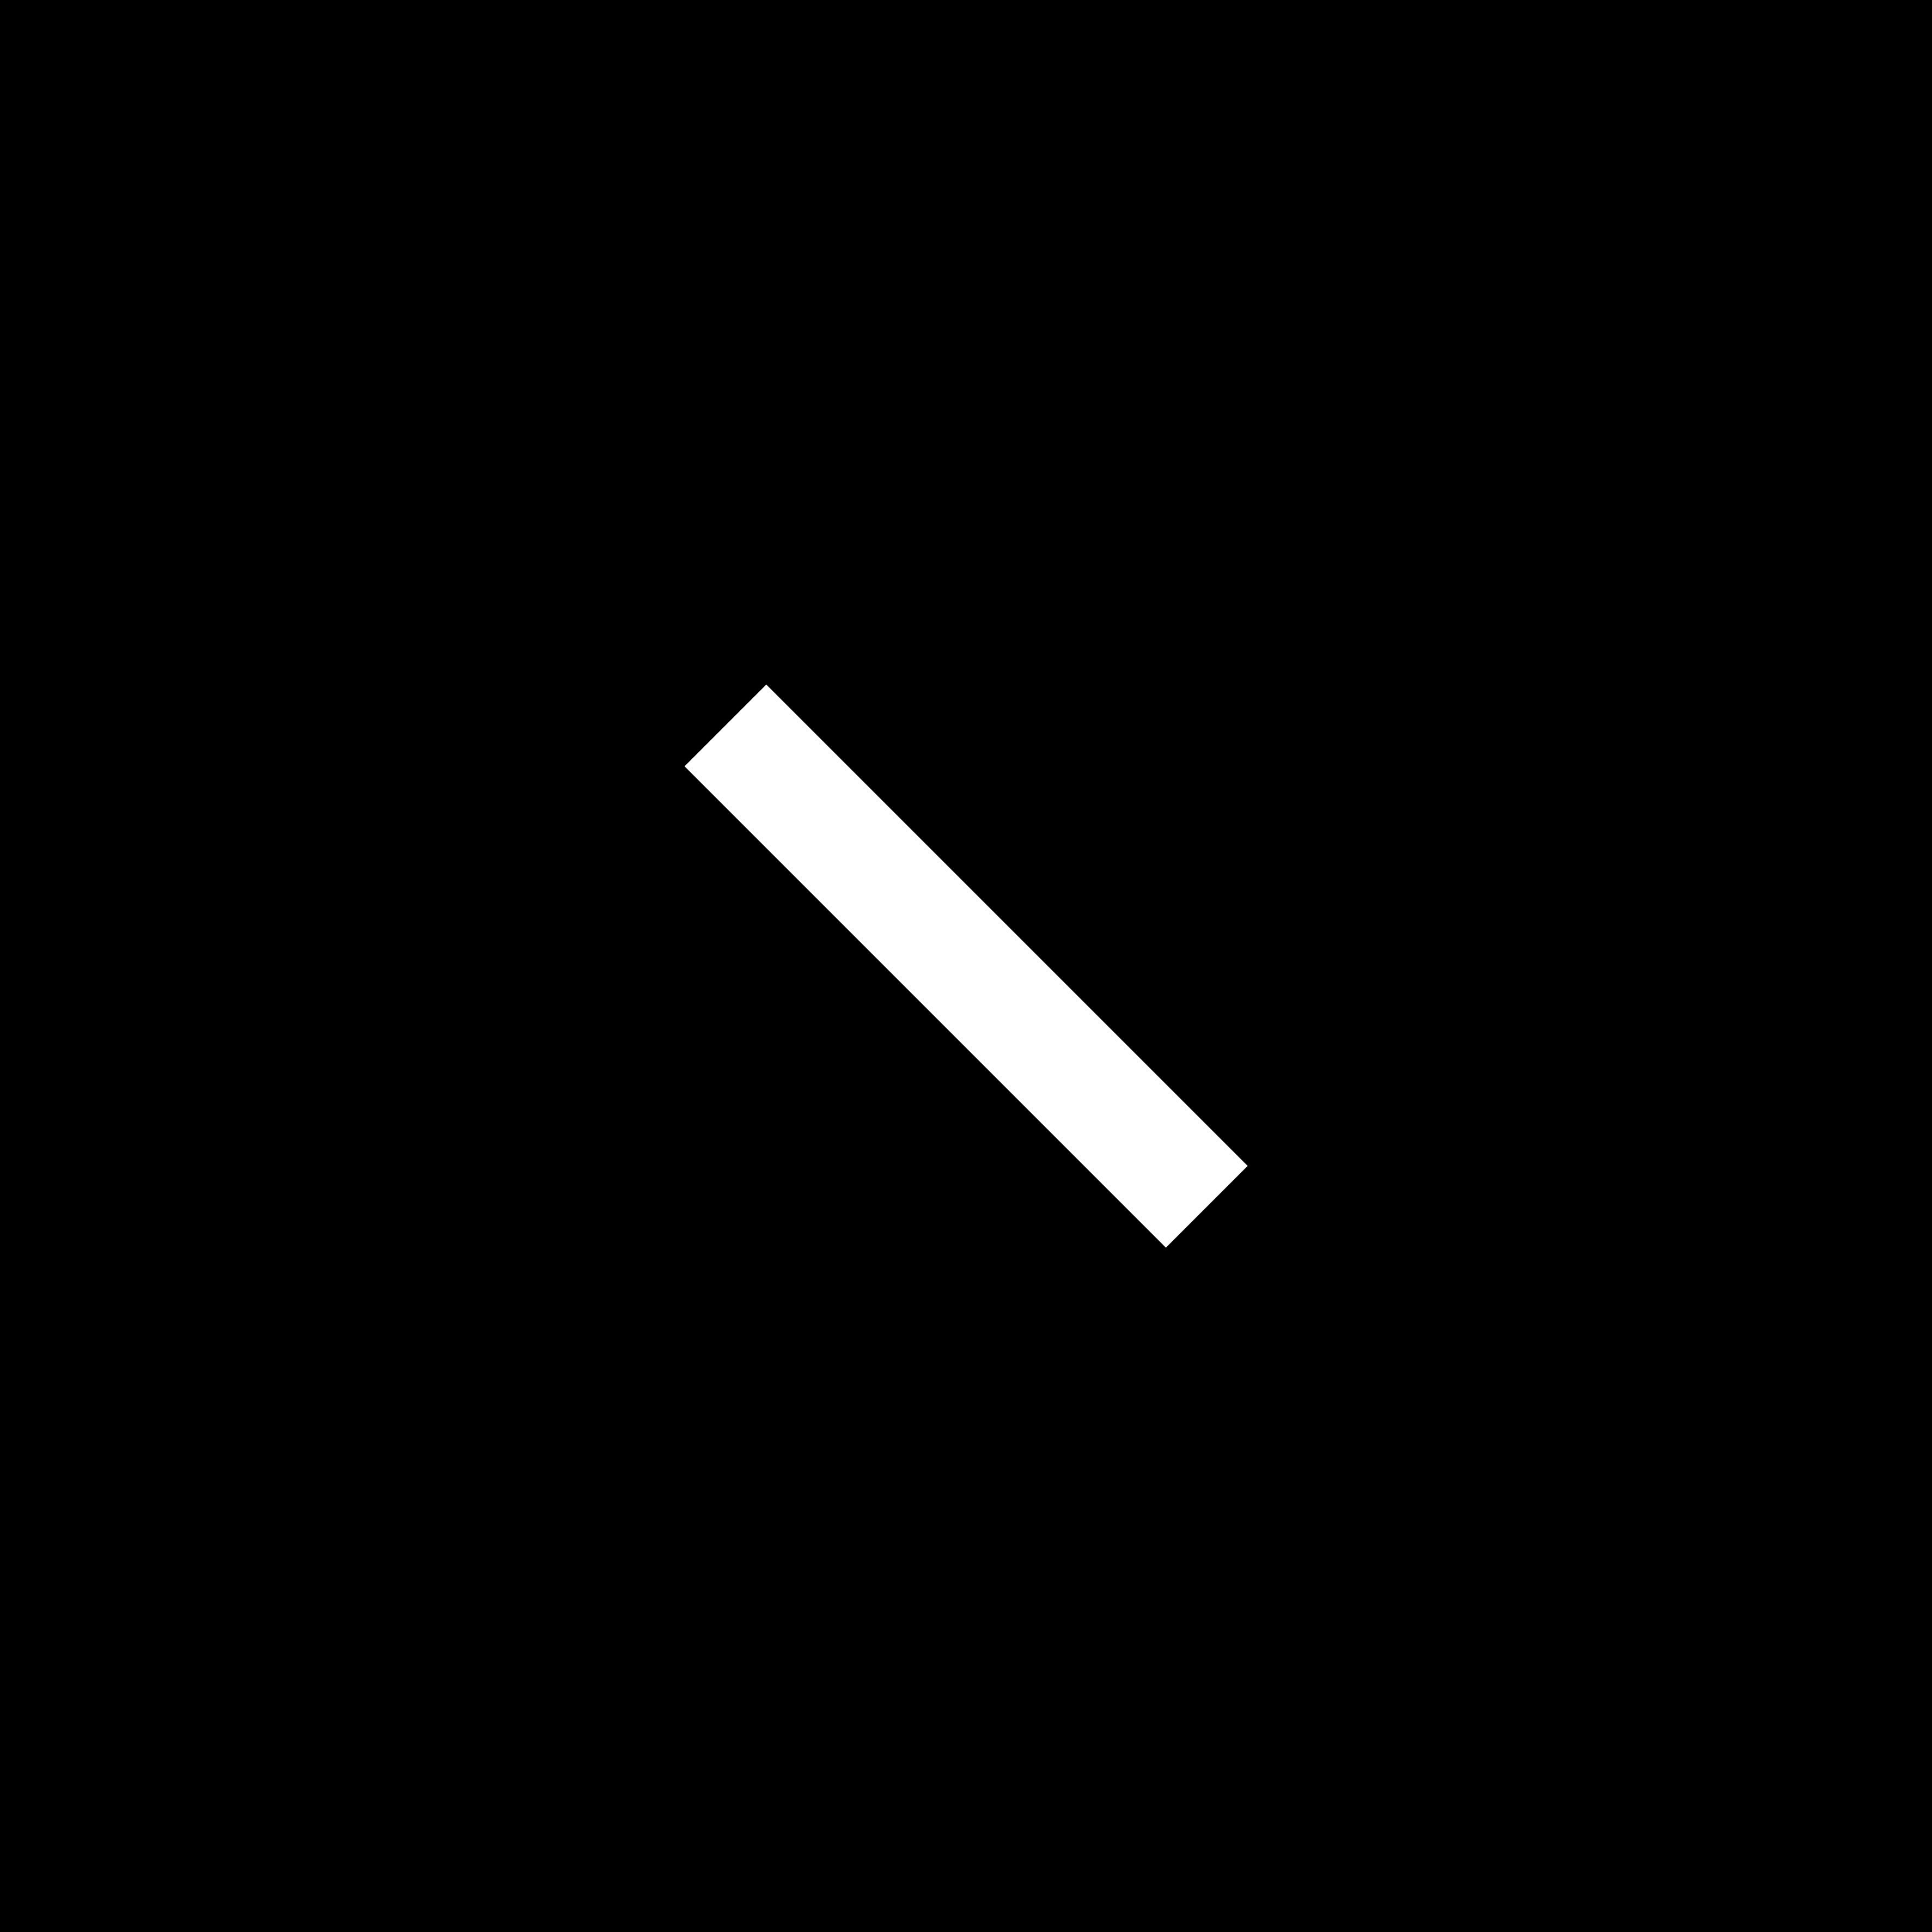

Supplement: Supplementary file 2 [file Hu_Listen_to_the_CVPR_2019_supplemental.pdf › 3386-supp/examples/the modified scheme w.r.t. audio length/third lesson/-45.jpg]

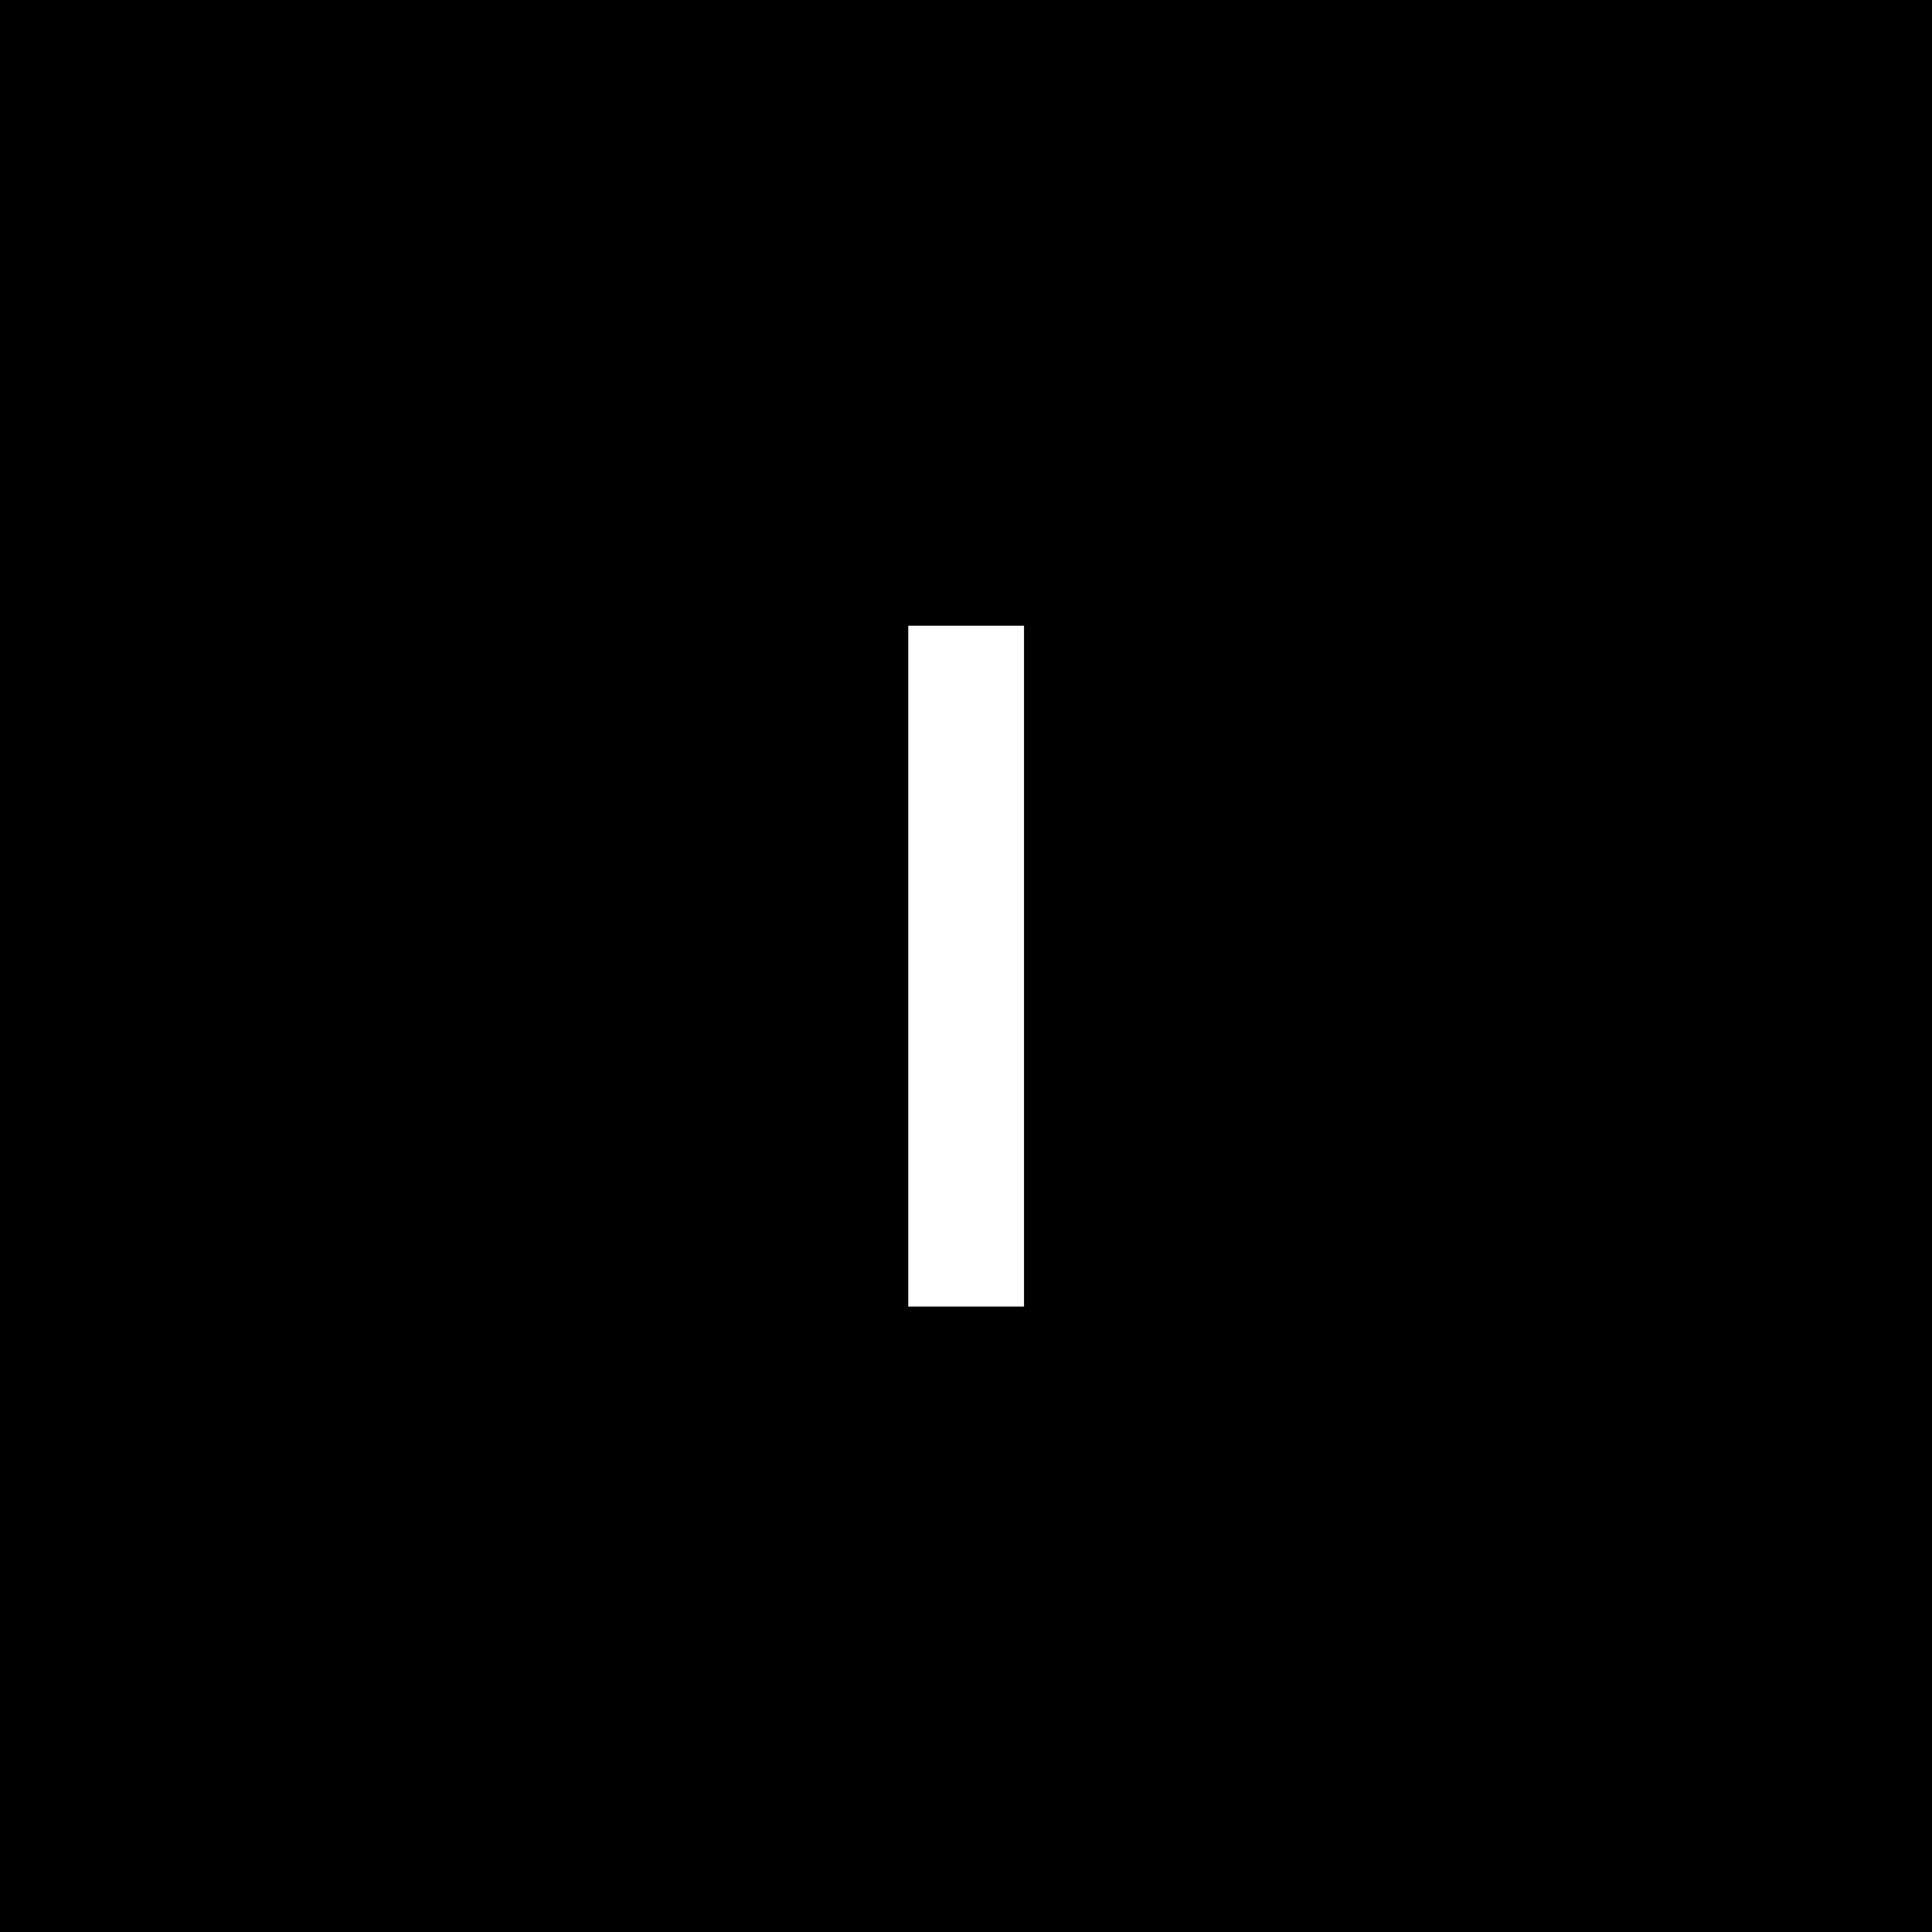

Supplement: Supplementary file 2 [file Hu_Listen_to_the_CVPR_2019_supplemental.pdf › 3386-supp/examples/the modified scheme w.r.t. audio length/third lesson/0.jpg]

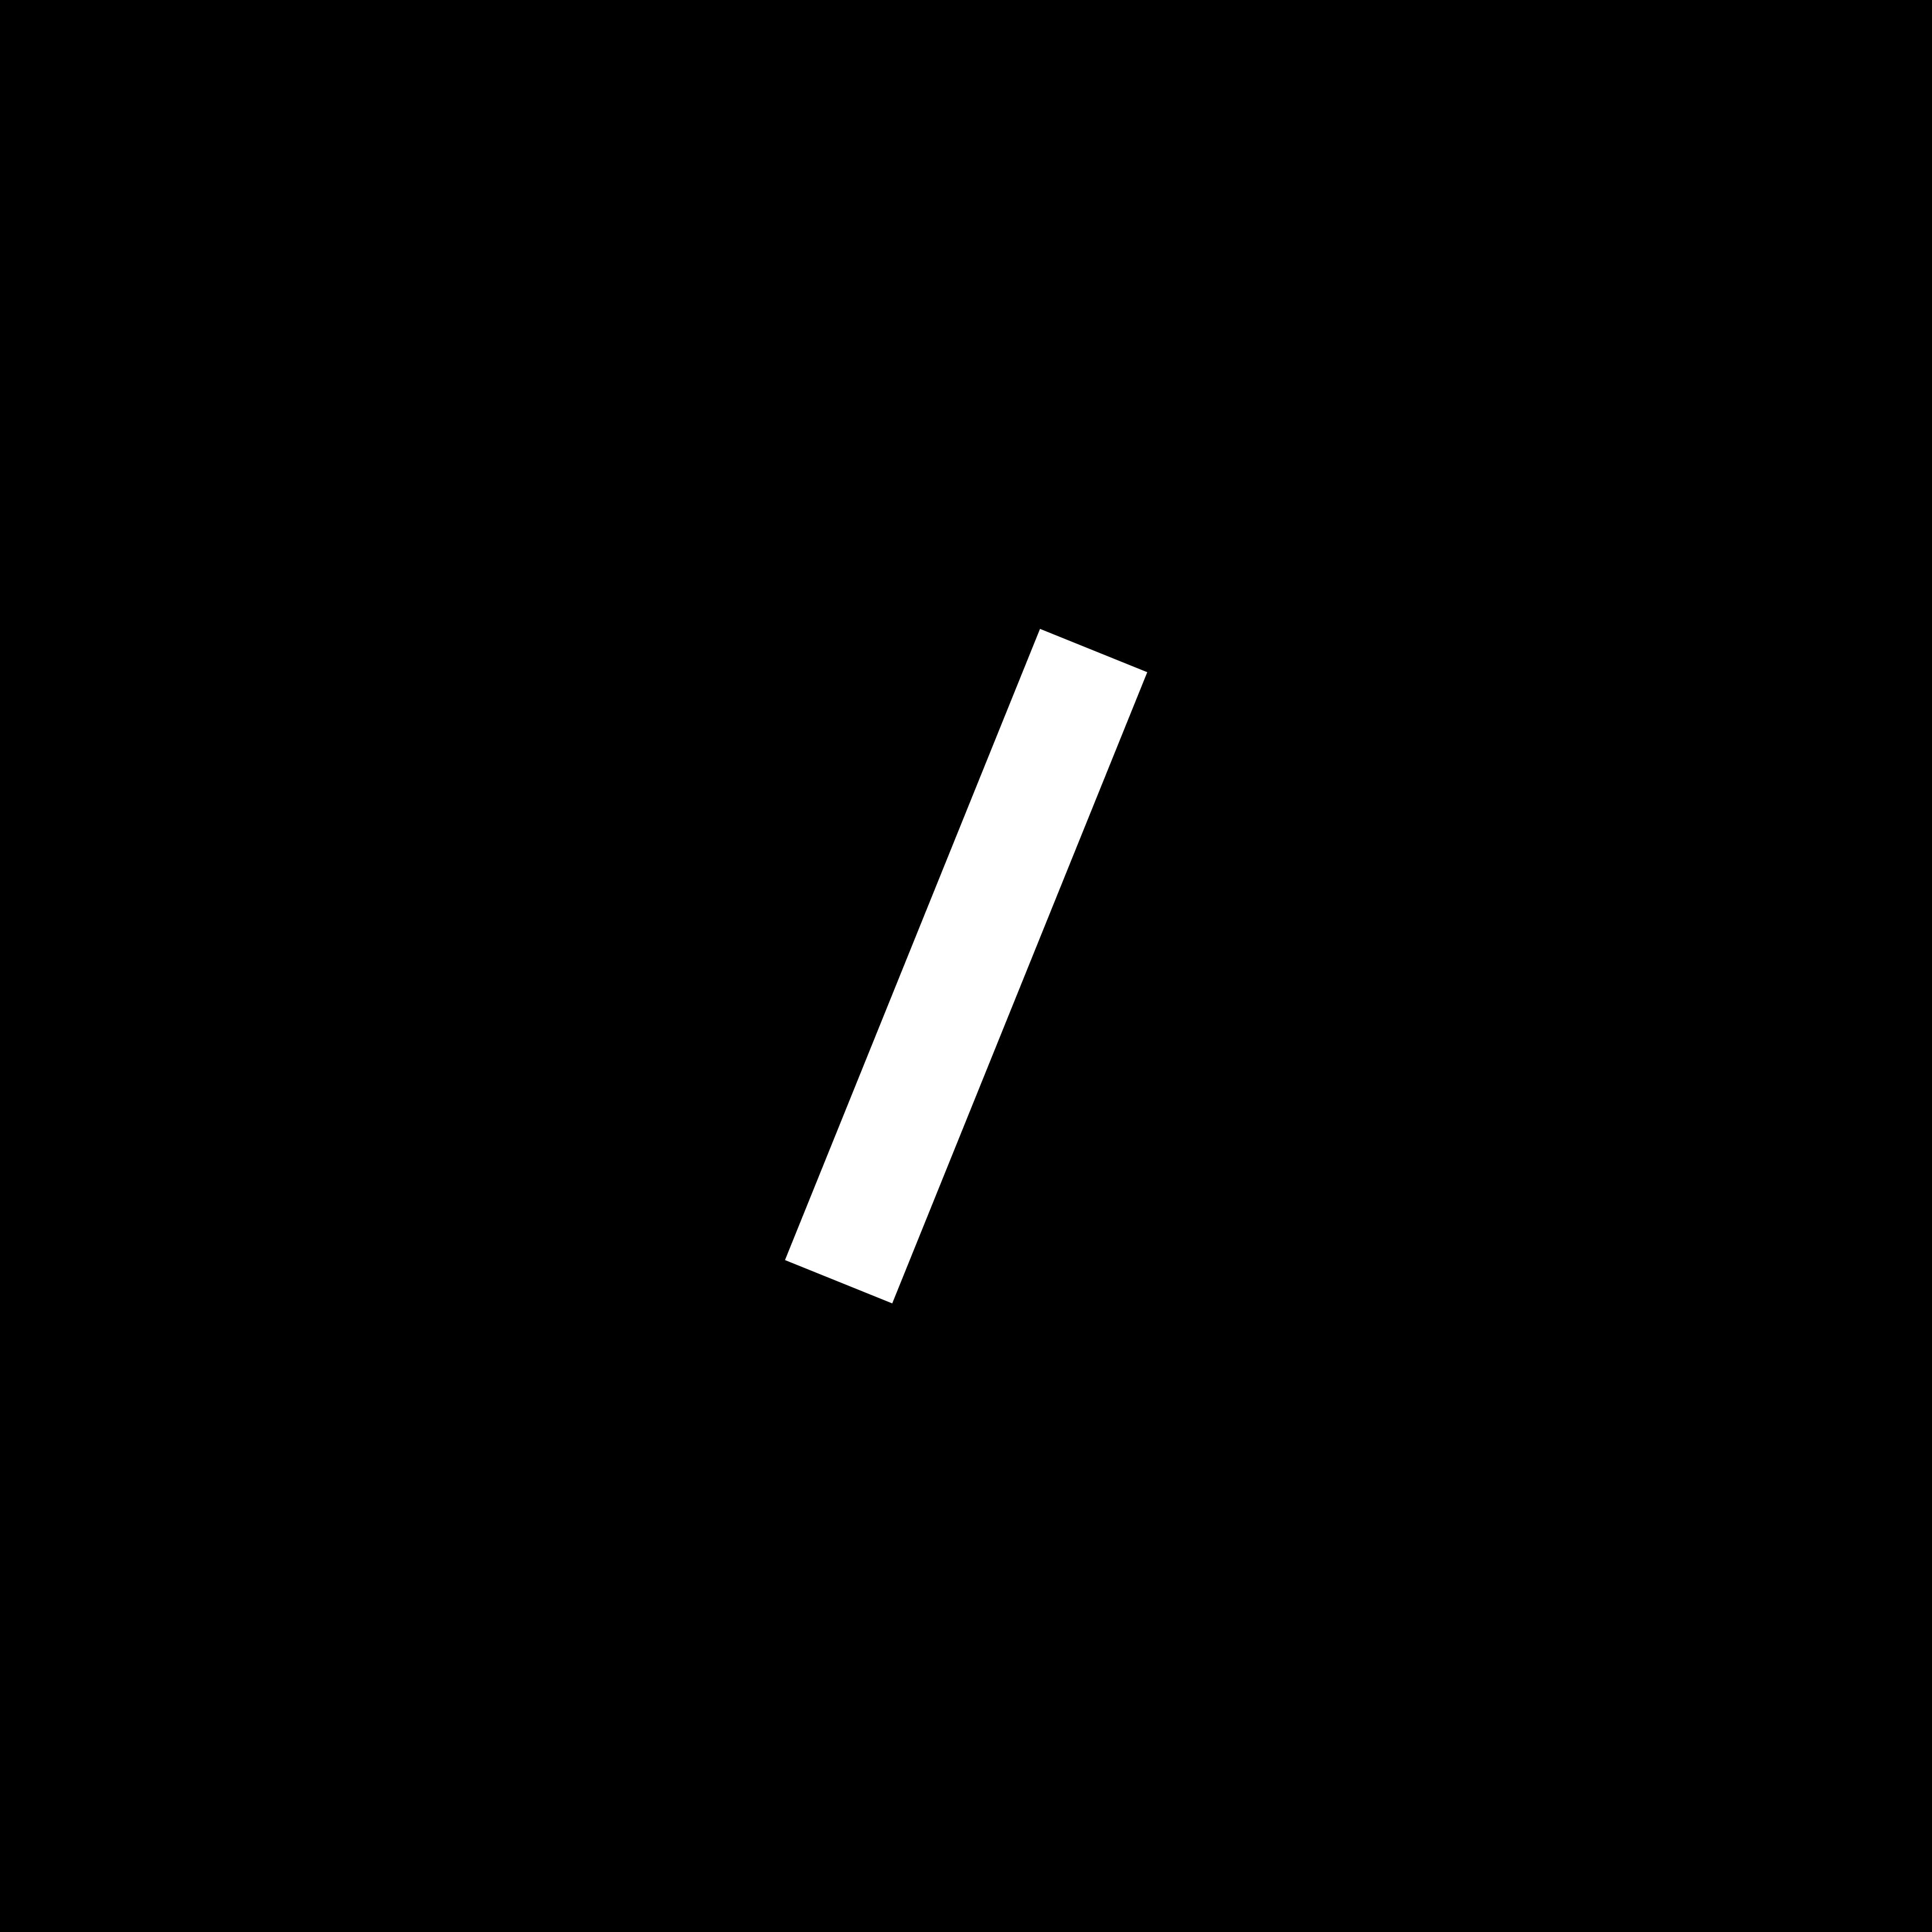

Supplement: Supplementary file 2 [file Hu_Listen_to_the_CVPR_2019_supplemental.pdf › 3386-supp/examples/the modified scheme w.r.t. audio length/third lesson/22.jpg]

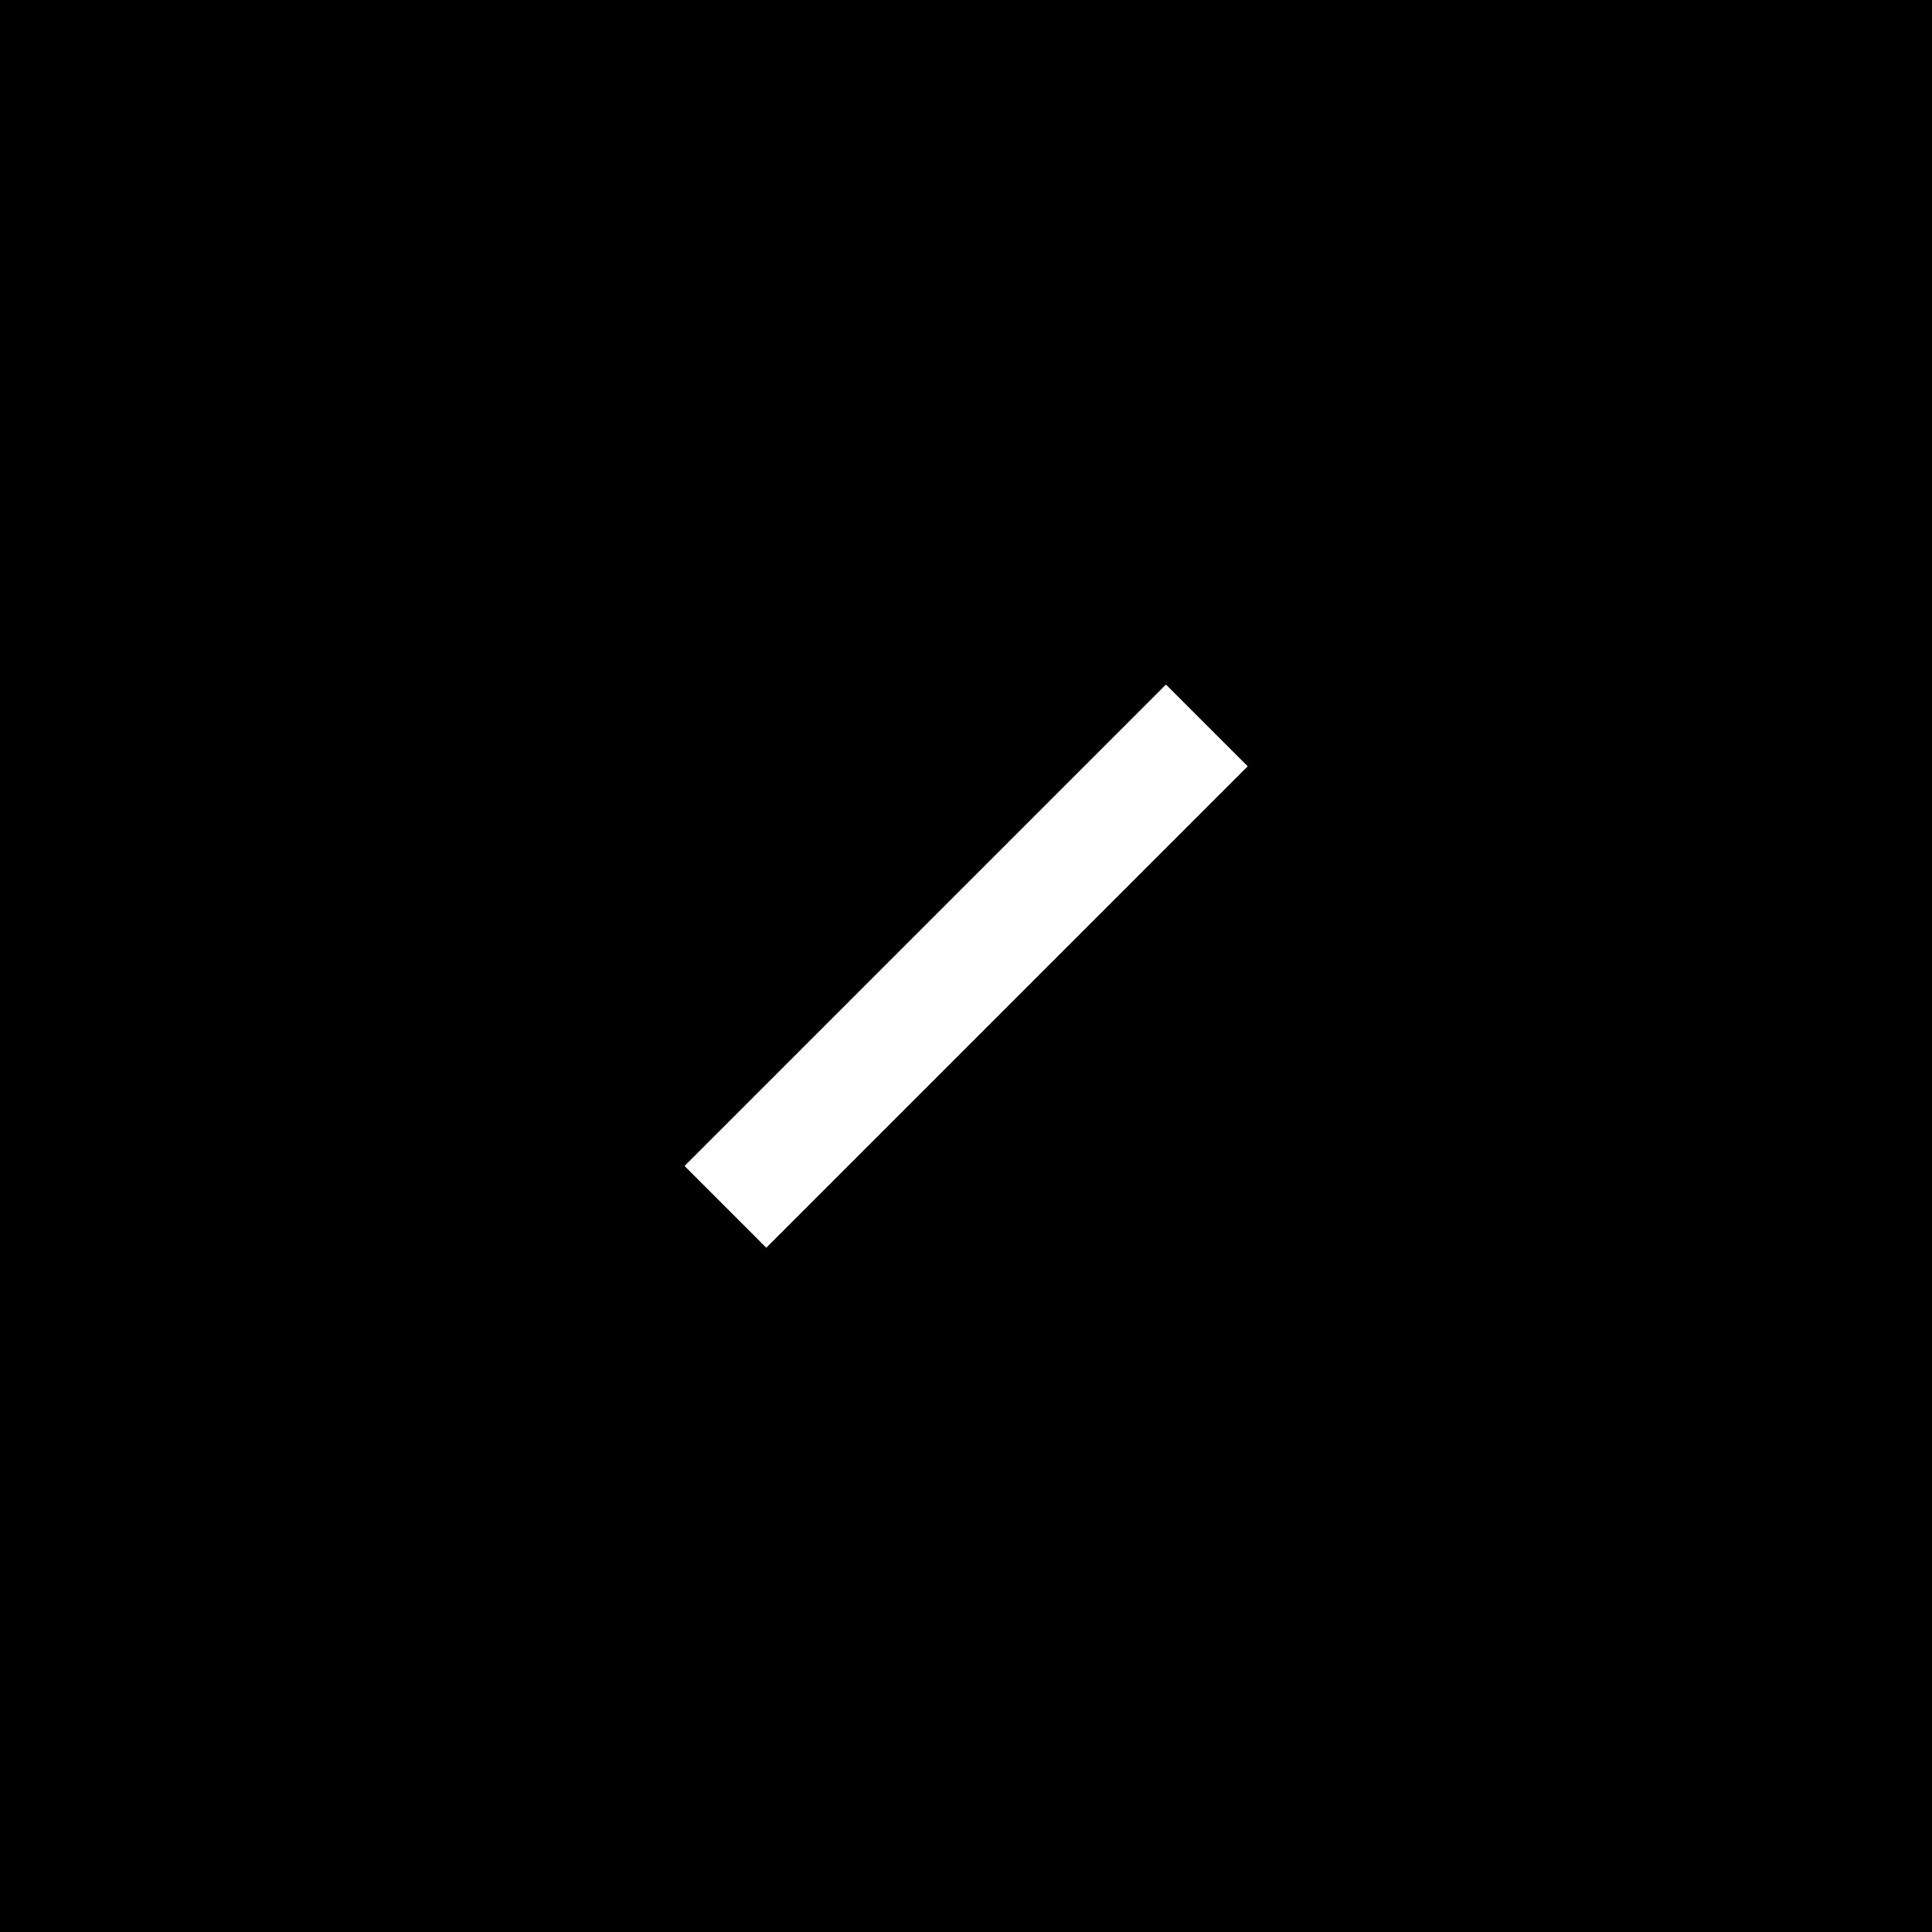

Supplement: Supplementary file 2 [file Hu_Listen_to_the_CVPR_2019_supplemental.pdf › 3386-supp/examples/the modified scheme w.r.t. audio length/third lesson/45.jpg]

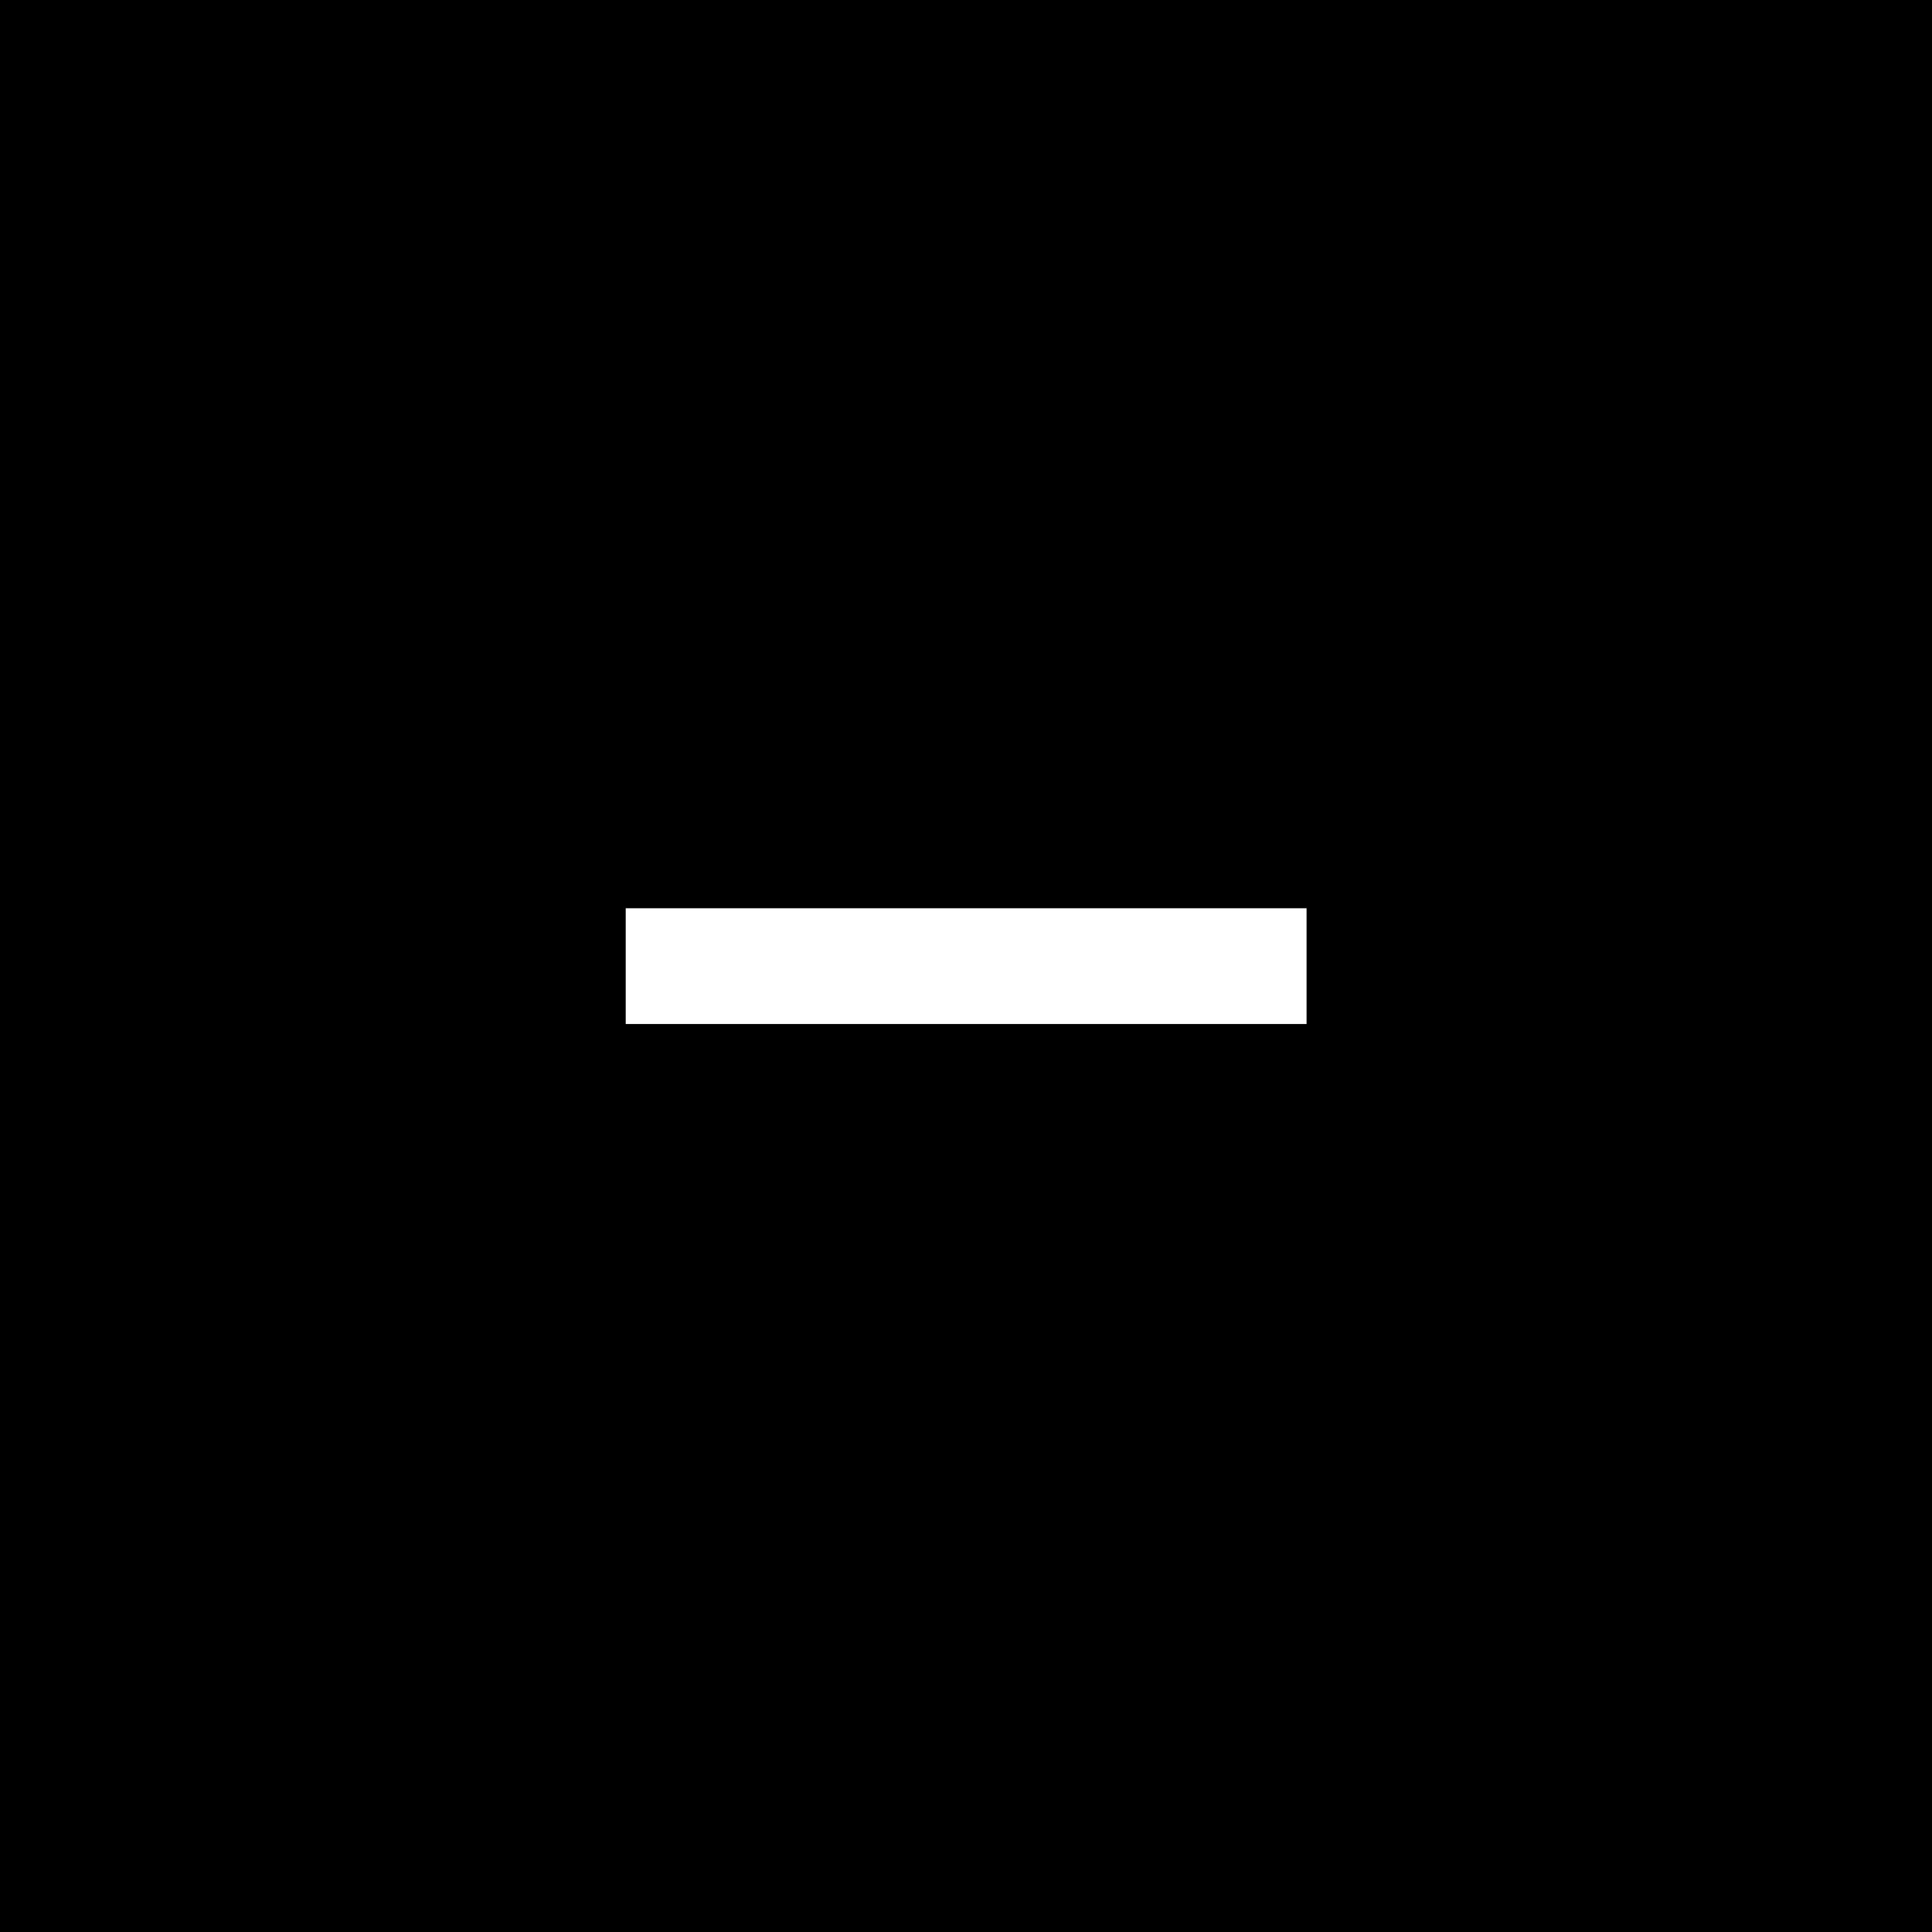

Supplement: Supplementary file 2 [file Hu_Listen_to_the_CVPR_2019_supplemental.pdf › 3386-supp/examples/the modified scheme w.r.t. audio length/third lesson/90.jpg]
